# Supplementary material for: Patient preferences and attitudes towards first choice medical services in Shenzhen, China: a cross-sectional study
Source: PubMed Central journal article supplement — BMJ Open. 2022 May 23;12(5):e057280. doi: 10.1136/bmjopen-2021-057280 (PMC9174822; doi:10.1136/bmjopen-2021-057280), 2022-05-23
Supplement: bmjopen-2021-057280.draft_revisions.pdf [file bmjopen-2021-057280.draft_revisions.pdf]

# BMJ Open

BMJ Open is committed to open peer review. As part of this commitment we make the peer review history of every article we publish publicly available.

When an article is published we post the peer reviewers' comments and the authors' responses online. We also post the versions of the paper that were used during peer review. These are the versions that the peer review comments apply to.

The versions of the paper that follow are the versions that were submitted during the peer review process. They are not the versions of record or the final published versions. They should not be cited or distributed as the published version of this manuscript.

BMJ Open is an open access journal and the full, final, typeset and author-corrected version of record of the manuscript is available on our site with no access controls, subscription charges or pay-per-view fees (<http://bmjopen.bmj.com>).

If you have any questions on BMJ Open's open peer review process please email [info.bmjopen@bmj.com](mailto:info.bmjopen@bmj.com)

# BMJ Open

## Patient preference of first medical service in Shenzhen, China: a cross-sectional study

|                               |                                                                                                                                                                                                                                                                                                                                                                                                                                                                                                                                                                                                                                                                                                                                                                                                                                         |
|-------------------------------|-----------------------------------------------------------------------------------------------------------------------------------------------------------------------------------------------------------------------------------------------------------------------------------------------------------------------------------------------------------------------------------------------------------------------------------------------------------------------------------------------------------------------------------------------------------------------------------------------------------------------------------------------------------------------------------------------------------------------------------------------------------------------------------------------------------------------------------------|
| Journal:                      | <i>BMJ Open</i>                                                                                                                                                                                                                                                                                                                                                                                                                                                                                                                                                                                                                                                                                                                                                                                                                         |
| Manuscript ID                 | bmjopen-2021-057280                                                                                                                                                                                                                                                                                                                                                                                                                                                                                                                                                                                                                                                                                                                                                                                                                     |
| Article Type:                 | Original research                                                                                                                                                                                                                                                                                                                                                                                                                                                                                                                                                                                                                                                                                                                                                                                                                       |
| Date Submitted by the Author: | 10-Sep-2021                                                                                                                                                                                                                                                                                                                                                                                                                                                                                                                                                                                                                                                                                                                                                                                                                             |
| Complete List of Authors:     | <p>Zhao, Xinyu; Guangdong Medical University School of Public Health, Epidemiology and Statistics<br/>         Xiao, Junhui; Guangdong Medical University<br/>         Chen, Huida; Guangdong Medical University, Department of Epidemiology and Statistics<br/>         Lin, Kena; Guangdong Medical University, Department of Epidemiology and Statistics<br/>         Li, Xiaoman; Guangdong Medical University, Department of Epidemiology and Statistics<br/>         Zeng, Zhiwen; Guangdong Medical University, Department of Epidemiology and Statistics<br/>         Huang, Shuyun; Guangdong Medical University, Department of Epidemiology and Statistics<br/>         Xie, Zhikui; Shenzhen Academy of Social Sciences<br/>         Du, Jinlin; Guangdong Medical University, Department of Epidemiology and Statistics</p> |
| Keywords:                     | EPIDEMIOLOGY, Health policy < HEALTH SERVICES ADMINISTRATION & MANAGEMENT, PUBLIC HEALTH                                                                                                                                                                                                                                                                                                                                                                                                                                                                                                                                                                                                                                                                                                                                                |
|                               |                                                                                                                                                                                                                                                                                                                                                                                                                                                                                                                                                                                                                                                                                                                                                                                                                                         |

SCHOLARONE™  
Manuscripts

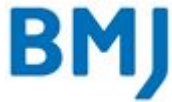

I, the Submitting Author has the right to grant and does grant on behalf of all authors of the Work (as defined in the below author licence), an exclusive licence and/or a non-exclusive licence for contributions from authors who are: i) UK Crown employees; ii) where BMJ has agreed a CC-BY licence shall apply, and/or iii) in accordance with the terms applicable for US Federal Government officers or employees acting as part of their official duties; on a worldwide, perpetual, irrevocable, royalty-free basis to BMJ Publishing Group Ltd ("BMJ") its licensees and where the relevant Journal is co-owned by BMJ to the co-owners of the Journal, to publish the Work in this journal and any other BMJ products and to exploit all rights, as set out in our [licence](#).

The Submitting Author accepts and understands that any supply made under these terms is made by BMJ to the Submitting Author unless you are acting as an employee on behalf of your employer or a postgraduate student of an affiliated institution which is paying any applicable article publishing charge ("APC") for Open Access articles. Where the Submitting Author wishes to make the Work available on an Open Access basis (and intends to pay the relevant APC), the terms of reuse of such Open Access shall be governed by a Creative Commons licence – details of these licences and which [Creative Commons](#) licence will apply to this Work are set out in our licence referred to above.

Other than as permitted in any relevant BMJ Author's Self Archiving Policies, I confirm this Work has not been accepted for publication elsewhere, is not being considered for publication elsewhere and does not duplicate material already published. I confirm all authors consent to publication of this Work and authorise the granting of this licence.

# Patient preference of first medical service in Shenzhen, China: a cross-sectional study

Zhao Xinyu,<sup>1</sup> Xiao Junhui,<sup>2</sup> Chen Huida,<sup>1</sup> Lin Kena,<sup>1</sup> Li Xiaoman,<sup>1</sup> Zeng Zhiwen,<sup>1</sup> Huang, Shuyun,<sup>1</sup> Xie Zhikui,<sup>3\*</sup> Du Jinlin<sup>1\*</sup>

<sup>1</sup> Department of Epidemiology and Statistics, School of Public Health, Guangdong Medical University, Dongguan, Guangdong, 52300, China

<sup>2</sup> Institute of Health Regulations and Policy, School of Humanities and Management, Guangdong Medical University, Dongguan, Guangdong, 52300, China

<sup>3</sup> Shenzhen Academy of Social Sciences, Shenzhen, Guangdong, 518028, China

\*Xie Zhikui and Du Jinlin contribute equally to this work

Correspondence to Dr Du Jinlin; [dujinlin@gdmu.edu.cn](mailto:dujinlin@gdmu.edu.cn)

Department of Epidemiology and Statistics, School of Public Health, Guangdong Medical University, Dongguan, Guangdong, 52300, China

Word Count: 3985

## Abstract

### Objectives

To explore the characteristics of Shenzhen citizens' preference of their first medical institution and their influencing factors at various medical levels and understand their attitudes towards community health services.

### Methods

1612 subjects with the age of 18 and above were stratified randomly sampled among 10 districts in Shenzhen and conducted with a self-designed questionnaire. Multivariate logistic regression analysis was performed to explore the influencing factors on the subjects' actual and expected preferred first medical institution.

## Results

The effective response rate of questionnaires was 93.05%. Over 50% of the subjects preferred municipal and district hospitals as their first choice and 27.5% would choose medical institutions depending on specific circumstances. Univariate analysis indicated that age, education, income, medical insurance, housing conditions and census register were significant in terms of actual and expected preferred first medical institution. Medical technology and convenience were the main factors in choosing a medical institution. Main factors on the subjects' actual and expected preferred medical institution were different. With actual preferred first medical institution as dependent variable, education, household registration and monthly income were the main factors ( $\chi^2=11.95$ ,  $P = 0.001$ ); whereas with expected preferred first medical institution as dependent variable, occupation, types of medical insurance participation and household registration were the main factors ( $\chi^2=15.130$ ,  $P = 0.034$ ).

## Conclusion

Shenzhen citizens with high education, high-income, or census register, preferred high-level medical institutions for the first visit. Medical resources were not successfully optimized, especially to community health service centers.

**Keywords:** healthcare preference, medical service, influential factor

1  
2  
3  
4  
5  
6  
7  
8  
9  
10  
11  
12  
13  
14  
15  
16  
17  
18  
19  
20  
21  
22  
23  
24  
25  
26  
27  
28  
29  
30  
31  
32  
33  
34  
35  
36  
37  
38  
39  
40  
41  
42  
43  
44  
45  
46  
47  
48  
49  
50  
51  
52  
53  
54  
55  
56  
57  
58  
59  
60

For peer review only

**Summary box****What is already known?**

- ▶ Shenzhen had made some progress on the reform of hierarchical diagnosis and treatment system, such as strengthening the construction of community health centers, and establishing a community general practitioner contract system.
- ▶ Problems of difficulty in registering and seeing a doctor in large hospitals and insufficient utilization of resources in primary medical institutions have not yet been fundamentally resolved.

**What are the new findings?**

- ▶ This study described the characteristics of Shenzhen citizens' preference of their first medical institution and their influencing factors at various medical levels and understand their attitudes towards community health services.
- ▶ Shenzhen citizens with high educational level, or high-income levels, or Shenzhen census register, are more inclined to choose high-level medical institutions for the first visit.
- ▶ The medical resources were not successfully optimized, especially to community health service centers.

**What do the new findings imply?**

- ▶ Shenzhen government should increase the investment in medical services as the investment in medical resources doesn't match the growth of its economy, which lagged far behind first-tier cities in China.
- ▶ Shenzhen government should also better allocate the medical resources among medical institutions at different levels and strengthen the ability and publicity of community health service centers.

**Introduction**

Benefited from the reform and opening policy in 1980s, Shenzhen has experienced an impressive gross domestic product growth and rapid economic development, yet accompanied by sharp demographic challenges. According to Shenzhen Bureau of Statistics, the permanent population reached 13.438 million by the end of 2019, which was 40.37 times the population in 1980, with an average annual increase of 9.95%.<sup>1</sup> With continuous population growth, the non-resident population, generally characterized by low education levels, low incomes, low residential stability, and young age,<sup>2</sup> accounted for 63% of the entire population. Because of high property prices, most non-residents had to purchase or rent self-built or village houses instead. Gradually and eventually, a special spatial pattern occurred, which might cause differences in the choice of medical service, compared with the residents.<sup>3</sup>

1  
2  
3 Compared with the rapid population growth, Shenzhen is suffering from a conspicuous  
4 insufficiency of medical resources. Shenzhen's medical expenditure in 2018 was 28.1  
5 billion yuan, only accounting for 1.1% of GDP, far lower than the national average  
6 (6.43%). The number of beds per 1,000 people in Shenzhen at the end of 2019 was 3.83  
7 , also far below the national average of 6.30. In China, healthcare is provided almost  
8 exclusively by state-owned public general hospitals at the primary, secondary, and  
9 tertiary levels. Citizens are free to choose healthcare facilities without being restricted  
10 by a gatekeeping mechanism and may bypass primary care and choose these higher-  
11 level facilities regardless of disease severity.<sup>4-6</sup> The disparity of medical resources in  
12 high-level and primary healthcare is obvious in many places , resulting in the  
13 phenomenon that high-level hospitals are usually overcrowded whereas primary  
14 healthcare is almost empty.<sup>7</sup>

15  
16 Hierarchical diagnosis and treatment is an important part of China's medical system  
17 reform, which aims to direct patient flow by changes in coverage and diversifying  
18 reimbursement rates.<sup>8</sup> Although Shenzhen had made some progress on the reform of  
19 hierarchical diagnosis and treatment system, problems of difficulty in registering and  
20 seeing a doctor in large hospitals and insufficient utilization of resources in primary  
21 medical institutions have not yet been fundamentally resolved. In order to better  
22 promote the reform of the hierarchical diagnosis and treatment system, it is vital  
23 important to first understand the citizens' choices of healthcare provider types and the  
24 associated factors. A previous systematic review analyzed a considerable body of  
25 studies and identified factors on the selection of healthcare, such as individual, facility,  
26 context and composite factors, influencing facility choice in China.<sup>9</sup> However, as  
27 China's youngest city, Shenzhen may be different from traditional cities due to its  
28 characteristics, such as living spaces and population composition. Therefore, to better  
29 promote the reform of the hierarchical diagnosis and treatment system in Shenzhen, the  
30 current study aims to: (1) explore the citizens' preference of first medical service and  
31 their influencing factors at various medical levels; (2) understand citizens' views and  
32 attitudes towards community health services.

## 33 34 35 36 37 38 39 40 41 42 43 44 **Methods**

### 45 46 47 **Participants**

48 Subjects were selected according to the outpatient records of Shenzhen Medical System  
49 in 2017. According to the pilot study, the awareness rate of the hierarchical diagnosis  
50 and treatment system was 40%, with the maximum permissible error of 2.5% and  
51 confidential level of 95%, the sample size was calculated as 1475. Considering possible  
52 invalid questionnaires, 1612 subjects were investigated with appropriate expansion of  
53 sample size. Stratified sampling was performed and the number of the participants  
54 varied according to the number of residents in each district. 50~220 households were  
55 first selected among 10 districts according to the population size. One resident at the  
56 age of 18 and above was then selected from each household. The Inclusion criteria:  
57  
58  
59  
60



1  
2  
3 living in Shenzhen for  $\geq 6$  months, agreeing to sign an informed consent form, good  
4 mental state and clear consciousness. Exclusion criteria: subjects suffering from severe  
5 mental illness or cognitive communication difficulties. All the subjects participated  
6 voluntarily and provided written informed consent.  
7  
8

### 9 **Data collection**

10 Selected subjects were first inquired by telephone to ensure that they understand and  
11 agree to the survey. Questionnaire entitled "Questionnaire on medical preference and  
12 behavior of Shenzhen residents" was conducted by face-to-face. Items were initially  
13 selected through literature and determined after three expert consultations. Final  
14 version of the questionnaire was determined after the modification from a pilot study.  
15 The investigation was conducted by uniformly trained investigators, and the quality is  
16 strictly controlled throughout the whole investigation.  
17  
18  
19  
20

### 21 **Statistical analysis**

22  
23  
24 All data were entered by two researchers simultaneously by Epidata 3.02. SPSS 25.0  
25 was used for data cleaning, sorting and statistical analysis. Descriptive statistics were  
26 used to describe participants' characteristics. The relationships between medical service  
27 seeking preference and various factors were analyzed by  $\chi^2$  tests. Multivariate logistic  
28 regression analysis, with inclusion criteria of 0.05 and exclusion of 0.10, was performed  
29 to explore the factors affecting the preference of medical service. All tests were two-  
30 way and the significance level was set at  $P < 0.05$ .  
31  
32  
33

### 34 **Ethnic statement**

35 The study was approved by the Ethics Committee of the Affiliated Hospital of  
36 Guangdong Medical University (ethical approval number: YJ2017045-1). All  
37 participants were aware of the aims and objectives of the study, informed that  
38 participation was voluntary and their data would remain confidential, and provided  
39 written informed consent.  
40  
41

### 42 **Patient and public involvement**

43  
44 There has been no patient and/or public involvement in the study design, data analysis  
45 and writing of the current study. The brief results were emailed to each participant after  
46 the investigation.  
47  
48

## 49 **Results**

### 50 **Test for the questionnaire**

51  
52 The reliability and validity of the questionnaire were good with an overall internal  
53 consistency, a Cronbach  $\alpha$  coefficient of 0.826, Kaiser-Meyer-Olkin index of 0.791 and  
54 the cumulative contribution rate of 6 factors of 81.959%.  
55  
56  
57  
58  
59  
60

### Subjects' characteristics

The characteristics of the participants are shown in **Table 1**. The average age was  $34.3 \pm 10.0$  years and the age composition were close to that of Shenzhen residents in 2010 population census. The number of subjects from each district were 210(14.0%) in Futian district, 210(14.0%) in Luohu district, 210(14.0%) in Nanshan district, 50 (3.3%) in Yantian district, 260 (17.3%) in Baoan district, 260(17.3%) in Longgang district, 150(10.0%) in Longhua district, 50(3.3%) in Pingshan district, 50(3.3%) in Guangming district and 50(3.3%) in Dapeng new district.

**Table 1 Basic characteristics of participants**

| Category                                        | n (%)     | Category                          | n (%)      |
|-------------------------------------------------|-----------|-----------------------------------|------------|
| <b>Sex</b>                                      |           | <b>Monthly incomes (CNY)</b>      |            |
| Male                                            | 733(48.9) | <3000                             | 158(10.5)  |
| Female                                          | 767(51.1) | 3000~                             | 479(31.9)  |
| <b>Age(years)</b>                               |           | 5000~                             | 626(41.7)  |
| <20                                             | 56(3.7)   | 10000~                            | 158(10.5)  |
| 21-30                                           | 607(40.5) | 15000~                            | 53(3.5)    |
| 31-40                                           | 520(34.7) | $\geq 30000$                      | 26(1.7)    |
| 41-50                                           | 204(13.6) | <b>Housing conditions</b>         |            |
| $\geq 51$                                       | 113(7.5)  | Self-purchased housing            | 351(23.4)  |
| <b>Educational level</b>                        |           | Renting policy housing            | 114(7.6)   |
| Junior high school and below                    | 222(14.8) | Renting housing in Urban Villages | 618(41.2)  |
| High school/technical secondary                 | 581(38.7) | Renting commercial housing        | 170(11.3)  |
| junior college                                  | 431(28.7) | Dormitory                         | 94(6.3)    |
| Undergraduate                                   | 242(16.1) | Others                            | 153(10.2)  |
| Post undergraduate                              | 24(1.6)   | <b>Medical insurance</b>          |            |
| <b>Occupation</b>                               |           | Level 1                           | 663(44.2)  |
| public institutions                             | 153(10.2) | Level 2                           | 336(22.4)  |
| professional and technical                      | 224(14.9) | Level 3                           | 187(12.5)  |
| Enterprise managers                             | 156(10.4) | Uninsured                         | 314(20.9)  |
| Enterprise staff                                | 208(13.9) | <b>Marital status</b>             |            |
| Individual industrial and commercial households | 228(15.2) | Single                            | 435(29.0)  |
|                                                 |           | Married                           | 1065(71.0) |

|            |           |                        |           |
|------------|-----------|------------------------|-----------|
| Worker     | 342(22.8) | <b>Census register</b> |           |
| Unemployed | 53(3.5)   | Registered             | 531(35.4) |
| Others     | 136(9.1)  | Non-registered         | 969(64.6) |

### Actual and expected preferred first medical institution

In terms of actual first medical institution, as the proportion of choosing private medical institution was very small and a clear stated medical preference would help us analyze the needs and influencing factors, we excluded 25 subjects choosing private medical institution, and 412 choosing medical institutions depending on specific circumstances. Further analysis was conducted in remaining 1063 subjects with specific preferences. The percentages of actual and expected preferred first medical institutions between sexes were shown in **Table 2**. Over 50% of the subjects chose municipal or district hospitals as first choice. There is no statistically significant difference in the actual medical institution selection among municipal, district-level, street-level and community health service between two sexes ( $\chi^2=5.034$ ,  $P=0.169$ ).

Similarly, in terms of expected preferred first medical institution, as no subject would choose private medical institution and 396 would choose according to specific circumstances, we excluded these 396 subjects and further analysis was conducted in the remaining 1104 subjects with specific preferences. Over three-quarters of the subjects expected to choose municipal and district-level hospitals for the first visit. There was no statistically difference among 1104 subjects with specific first medical institution choice between two sexes ( $\chi^2=2.843$ ,  $P=0.416$ ).

**Table 2 Selection of actual and expected preferred medical institutions in subjects with different demographic characteristics (n, %)**

| Variables | Actual selection                  |                    |                        |                          |           | Expected selection  |                    |                        |                          |         |             |
|-----------|-----------------------------------|--------------------|------------------------|--------------------------|-----------|---------------------|--------------------|------------------------|--------------------------|---------|-------------|
|           | Municipal hospitals               | District hospitals | Street-level hospitals | Community Health Service | Total     | Municipal hospitals | District hospitals | Street-level hospitals | Community Health Service | Total   |             |
| Sex       | Male                              | 154(29.8)          | 143(27.7)              | 73(14.1)                 | 146(28.3) | 516(100.0)          | 318(59.6)          | 147(27.5)              | 38(7.1)                  | 31(5.8) | 534(100.0)  |
|           | Female                            | 162(29.6)          | 161(29.4)              | 54(9.9)                  | 170(31.1) | 547(100.0)          | 328(57.5)          | 165(28.9)              | 52(9.1)                  | 25(4.4) | 570(100.0)  |
|           | Total                             | 316(29.7)          | 304(28.6)              | 127(11.9)                | 316(29.7) | 1063(100.0)         | 646(58.5)          | 312(28.3)              | 90(8.2)                  | 56(5.1) | 1104(100.0) |
| Age       | <21                               | 6(18.8)            | 2(6.3)                 | 2(6.3)                   | 22(68.8)  | 32(100.0)           | 17(45.9)           | 10(27.0)               | 8(21.6)                  | 2(5.4)  | 37(100.0)   |
|           | 21~                               | 131(32.1)          | 112(27.5)              | 53(13.0)                 | 112(27.5) | 408(100.0)          | 262(59.3)          | 120(27.1)              | 39(8.8)                  | 21(4.8) | 442(100.0)  |
|           | 31~                               | 98(26.2)           | 121(32.4)              | 46(12.3)                 | 109(29.1) | 374(100.0)          | 211(55.5)          | 124(32.6)              | 28(7.4)                  | 17(4.5) | 380(100.0)  |
|           | 41~                               | 56(35.4)           | 44(27.8)               | 16(10.1)                 | 42(26.8)  | 158(100.0)          | 96(62.7)           | 42(27.5)               | 7(4.6)                   | 8(5.2)  | 153(100.0)  |
|           | ≥51                               | 25(27.5)           | 25(27.5)               | 10(11.0)                 | 31(34.1)  | 91(100.0)           | 60(65.2)           | 16(17.4)               | 8(8.7)                   | 8(8.7)  | 92(100.0)   |
|           | Total                             | 316(29.7)          | 304(28.6)              | 127(11.9)                | 316(29.7) | 1063(100.0)         | 646(58.5)          | 312(28.3)              | 90(8.2)                  | 56(5.1) | 1104(100.0) |
| Education | Junior high school and below      | 28(20.0)           | 29(20.7)               | 15(10.7)                 | 68(48.6)  | 140(100.0)          | 81(52.9)           | 41 (26.8)              | 19(12.4)                 | 12(7.8) | 153(100.0)  |
|           | High school / technical secondary | 102(25.1)          | 123(30.3)              | 46(11.3)                 | 135(33.3) | 406(100.0)          | 232(55.0)          | 134 (31.8)             | 35(8.3)                  | 21(5.0) | 422(100.0)  |
|           | junior college                    | 95(29.3)           | 99(30.6)               | 47(14.5)                 | 83(25.6)  | 324(100.0)          | 196(59.9)          | 97 (29.7)              | 20(6.1)                  | 14(4.3) | 327(100.0)  |
|           | undergraduate and above           | 91(47.2)           | 53(27.5)               | 19(9.8)                  | 30(15.5)  | 193(100.0)          | 137(67.8)          | 40 (19.8)              | 16(7.9)                  | 9(4.5)  | 202(100.0)  |
|           | Total                             | 316(29.7)          | 304(28.6)              | 127(11.9)                | 316(29.7) | 1063(100.0)         | 646(58.5)          | 312(28.3)              | 90(8.2)                  | 56(5.1) | 1104(100.0) |

| Variables          | Actual selection                  |                    |                        |                          |           | Expected selection  |                    |                        |                          |         |             |
|--------------------|-----------------------------------|--------------------|------------------------|--------------------------|-----------|---------------------|--------------------|------------------------|--------------------------|---------|-------------|
|                    | Municipal hospitals               | District hospitals | Street-level hospitals | Community Health Service | Total     | Municipal hospitals | District hospitals | Street-level hospitals | Community Health Service | Total   |             |
| Monthly income     | <3000                             | 37(32.7)           | 28(24.8)               | 9(8.0)                   | 39(34.5)  | 113(100.0)          | 74(60.2)           | 29 (23.6)              | 13(10.6)                 | 7(5.7)  | 123(100.0)  |
|                    | 3000~                             | 65(19.0)           | 74(21.6)               | 48(14.0)                 | 155(45.3) | 342(100.0)          | 194(52.3)          | 107(28.8)              | 50(13.5)                 | 20(5.4) | 371(100.0)  |
|                    | 5000~                             | 123(28.4)          | 158(36.5)              | 54(12.5)                 | 98(22.6)  | 433(100.0)          | 246(57.3)          | 149(34.7)              | 19(4.4)                  | 15(3.5) | 429(100.0)  |
|                    | 10000~                            | 54(44.3)           | 37(30.3)               | 12(9.8)                  | 19(15.6)  | 122(100.0)          | 88(72.7)           | 17(14.0)               | 7(5.8)                   | 9(7.4)  | 121(100.0)  |
|                    | ≥15000                            | 37(69.8)           | 7(13.2)                | 4(7.5)                   | 5(9.4)    | 53(100.0)           | 44(73.3)           | 10(16.7)               | 1(1.7)                   | 5(8.3)  | 60(100.0)   |
|                    | Total                             | 316(29.7)          | 304(28.6)              | 127(11.9)                | 316(29.7) | 1063(100.0)         | 646(58.5)          | 312(28.3)              | 90(8.2)                  | 56(5.1) | 1104(100.0) |
| Medical insurance  | Level 1                           | 179(36.2)          | 149(30.1)              | 51(10.3)                 | 116(23.4) | 495(100.0)          | 316(65.2)          | 129(26.6)              | 27(5.6)                  | 13(2.7) | 485(100.0)  |
|                    | Level 2                           | 55(21.1)           | 92(35.2)               | 40(15.3)                 | 74(28.4)  | 261(100.0)          | 136(50.9)          | 89(33.9)               | 24(9.0)                  | 18(8.3) | 267(100.0)  |
|                    | Level 3                           | 23(16.7)           | 44(31.9)               | 17(12.3)                 | 54(39.1)  | 138(100.0)          | 71(45.2)           | 51(32.5)               | 22(14.0)                 | 13(8.3) | 157(100.0)  |
|                    | uninsured                         | 59(34.9)           | 19(11.2)               | 19(11.2)                 | 72(42.6)  | 169(100.0)          | 123(63.1)          | 43(22.1)               | 17(8.7)                  | 12(6.2) | 195(100.0)  |
|                    | Total                             | 316(29.7)          | 304(28.6)              | 127(11.9)                | 316(29.7) | 1063(100.0)         | 646(58.5)          | 312(28.3)              | 90(8.2)                  | 56(5.1) | 1104(100.0) |
| Housing conditions | Self-purchased housing            | 110(39.6)          | 92(33.1)               | 25(9.0)                  | 51(18.3)  | 278(100.0)          | 168(62.7)          | 71(26.5)               | 15(5.6)                  | 14(5.2) | 268(100.0)  |
|                    | Renting policy housing            | 15(20.2)           | 36(48.0)               | 11(14.7)                 | 13(17.3)  | 75(100.0)           | 41(53.9)           | 22(28.9)               | 6(7.9)                   | 7(9.2)  | 76(100.0)   |
|                    | Renting housing in Urban Villages | 93(21.9)           | 114(26.8)              | 65(15.3)                 | 153(36.0) | 425(100.0)          | 222(49.8)          | 154(34.5)              | 50(11.2)                 | 20(4.5) | 446(100.0)  |
|                    | Renting commercial housing        | 56(39.2)           | 29(20.3)               | 8(5.6)                   | 50(35.0)  | 143(100.0)          | 103(70.5)          | 30(20.5)               | 8(5.5)                   | 5(3.4)  | 146(100.0)  |

| Variables       | Actual selection    |                    |                        |                          |             | Expected selection  |                    |                        |                          |             |             |
|-----------------|---------------------|--------------------|------------------------|--------------------------|-------------|---------------------|--------------------|------------------------|--------------------------|-------------|-------------|
|                 | Municipal hospitals | District hospitals | Street-level hospitals | Community Health Service | Total       | Municipal hospitals | District hospitals | Street-level hospitals | Community Health Service | Total       |             |
| Dormitory       | 13(23.2)            | 14(25.0)           | 4(7.1)                 | 25(44.6)                 | 56(100.0)   | 51(65.4)            | 17(21.8)           | 6(7.7)                 | 4(5.1)                   | 78(100.0)   |             |
| Others          | 29(33.7)            | 19(22.1)           | 14(16.3)               | 24(27.9)                 | 86(100.0)   | 61(67.8)            | 18(20.0)           | 5(5.6)                 | 6(6.7)                   | 90(100.0)   |             |
| Total           | 316(29.7)           | 304(28.6)          | 127(11.9)              | 316(29.7)                | 1063(100.0) | 646(58.5)           | 312(28.3)          | 90(8.2)                | 56(5.1)                  | 1104(100.0) |             |
| Marital status  | Single              | 86(33.5)           | 58(22.6)               | 35(13.6)                 | 78(30.4)    | 257(100.0)          | 192(64.6)          | 59(19.9)               | 31(10.4)                 | 15(5.1)     | 297(100.0)  |
|                 | Married             | 230(28.5)          | 246(30.5)              | 92(11.4)                 | 238(29.5)   | 806(100.0)          | 454(56.3)          | 253(31.4)              | 59(7.3)                  | 41(5.1)     | 807(100.0)  |
|                 | Total               | 316(29.7)          | 304(28.6)              | 127(11.9)                | 316(29.7)   | 1063(100.0)         | 646(58.5)          | 312(28.3)              | 90(8.2)                  | 56(5.1)     | 1104(100.0) |
| census register | Registered          | 138(34.7)          | 140(35.2)              | 34(8.5)                  | 86(21.6)    | 398(100.0)          | 254(65.3)          | 100(25.7)              | 21(5.4)                  | 14(3.6)     | 398(100.0)  |
|                 | Non-registered      | 178(26.8)          | 164(24.7)              | 93(14.0)                 | 230(34.6)   | 665(100.0)          | 392(54.8)          | 212(29.7)              | 69(9.7)                  | 42(5.9)     | 665(100.0)  |
|                 | Total               | 316(29.7)          | 304(28.6)              | 127(11.9)                | 316(29.7)   | 1063(100.0)         | 646(58.5)          | 312(28.3)              | 90(8.2)                  | 56(5.1)     | 1104(100.0) |

## Demographic characteristics and preferred first medical institution

The demographic characteristics, including age, education, income, medical insurance, housing condition, marital status and census register, grouped by the selection of actual and expected preferred medical institutions were presented in **Table 2**.

### Age

Significant differences were both observed in the level of actual ( $\chi^2=33.257, P=0.001$ ) and expected medical institutions ( $\chi^2=23.415, P=0.024$ ) among different age groups. In terms of actual first medical institution, the largest proportion of choosing municipal medical institutions as their first choice were observed in the age group of 21~30 and 41~50 years. The largest proportion of choosing community health service center were observed in the age group of  $\leq 20$  years, with the proportion of 68.8%. In terms of expected first medical institution, with age increase, subjects expect to choose higher level of medical institution. The proportion of choosing municipal hospital was the largest in each age group, ranging from 45.9% to 65.2%.

### Education

Subjects with different educational backgrounds had different preferences for actual ( $\chi^2=67.169, P<0.001$ ) and expected medical institutions ( $\chi^2=20.079, P=0.017$ ). Those with high educational level are more inclined to choose high-level medical institutions for the first visit. Linear trends were observed between education levels and actual ( $\chi^2=54.189, P<0.0001$ ). or expected medical institutions ( $\chi^2=20.079, P=0.017$ ).

### Income

Significant differences were both observed in the level of actual ( $\chi^2=127.362, P<0.001$ ) and expected medical institutions ( $\chi^2=57.767, P<0.001$ ) among subjects with different income level. Linear trends were observed between monthly income levels and actual ( $\chi^2=62.024, P<0.0001$ ). or expected medical institutions ( $\chi^2=5.569, P=0.018$ ). Those with high monthly income levels are more inclined to choose high levels for the first visit medical institutions. In terms of expected medical institution, over 50% of the subjects in all monthly income groups would choose municipal hospital as their first medical institution, of which, the largest proportion were observed in the group of 10000-14999 yuan and over 15000 yuan, with the corresponding proportion of 72.7% and 73.3%.

### Medical insurance

Significant differences were both observed in the level of actual ( $\chi^2=69.656, P<0.001$ )

1  
2  
3 and expected medical institutions ( $\chi^2=39.734$ ,  $P<0.001$ ) among subjects with different  
4 medical insurance levels. Linear trends were observed between medical insurance  
5 levels and actual ( $\chi^2=26.885$ ,  $P<0.0001$ ) or expected medical institutions ( $\chi^2=10.450$ ,  
6  $P=0.001$ ). Subjects with lower level of medical insurance are more inclined to choose  
7 community health service center. In terms of expected medical institution, the  
8 proportion of choosing municipal hospital was the highest, ranging from 45.2% to 65.2%  
9  
10  
11

### 12 Housing conditions

13  
14  
15 Subjects with different housing conditions had different preferences for actual  
16 ( $\chi^2=84.040$ ,  $P<0.001$ ) and expected medical institutions ( $\chi^2=38.790$ ,  $P=0.001$ ). In  
17 terms of actual medical institution, the proportions of subjects with self-purchased  
18 houses and rented commercial houses choosing municipal hospitals as their first  
19 medical institution, were the highest, with the corresponding proportions of 39.6% and  
20 39.2%, respectively. The proportion of the subjects with renting policy housing who  
21 choose district-level hospitals was highest, reaching 48.0%. The proportion of the  
22 subjects living in dormitory who choose community health service center was highest,  
23 reaching 44.6%. In terms of expected medical institution, the proportion of choosing  
24 municipal hospital was the highest, in all groups with different housing conditions.  
25 Comparatively, the overall proportion of choosing community health service center was  
26 only 5.1%, ranging from 3.4% to 9.2% in all groups.  
27  
28  
29  
30  
31  
32

### 33 Marital status

34  
35  
36 There is no statistically significant difference in the actual medical institution selection  
37 and marital status ( $\chi^2=6.738$ ,  $P=0.081$ ). The proportions of choosing municipal hospital  
38 and community health service center in single subjects were the highest, with the  
39 corresponding percentage of 33.5 and 30.4. However, significant difference was  
40 observed between marital status and expected medical institutions ( $\chi^2=15.348$ ,  
41  $P=0.002$ ). The proportion of expecting municipal hospital was highest in both single  
42 and married subjects, with the corresponding percentage of 64.6 and 56.3, respectively.  
43 Only 5.1% of the subjects would choose community health service center.  
44  
45  
46  
47

### 48 Census register

49  
50  
51 Significant differences were both observed in the level of actual ( $\chi^2=35.141$ ,  $P<0.001$ )  
52 and expected medical institutions ( $\chi^2=14.263$ ,  $P=0.003$ ) among subjects with different  
53 census register. In terms of actual medical institution, subjects with Shenzhen census  
54 register were more inclined to choose municipal and district-level hospitals, with the  
55 corresponding percentage of 34.7 and 35.2, respectively. Subjects without Shenzhen  
56 census register were inclined to choose community health service center, with the  
57 percentage of 34.6. Comparatively, subjects with and without Shenzhen census register  
58  
59  
60



both expect municipal hospital, and district-level hospital as the second choice.

### Medical technology and convenience are the main factors in choosing a medical institution

Major factors on the selection of medical institution were shown in **Table 3**. Over 70% of the subjects considered medical technology and convenience as the main factors in choosing a medical institution. 14.04% and 12.68% of the subjects considered service attitude and medical price, respectively, in choosing a medical institution. Only 2.80% considered according to specific circumstances.

**Table 3 Major factors on the actual and expected selection of first medical institution (n, %)**

| Major factors                           | Municipal hospital | District-level | Street-level hospital | Community health service | Total       |
|-----------------------------------------|--------------------|----------------|-----------------------|--------------------------|-------------|
| Medical technology                      | 350 (73.5)         | 96 (20.2)      | 15 (3.2)              | 15 (3.2)                 | 476(100.0)  |
| Convenience                             | 127 (42.1)         | 126 (41.7)     | 30 (9.9)              | 19 (6.3)                 | 302(100.0)  |
| Attitude of service and medical ethnics | 93 (60.0)          | 29 (18.7)      | 24 (15.5)             | 9 (5.8)                  | 155(100.0)  |
| Price                                   | 57 (40.7)          | 55 (39.3)      | 20 (11.8)             | 8 (5.7)                  | 140(100.0)  |
| Others                                  | 19 (61.3)          | 6 (19.4)       | 1 (3.2)               | 5 (16.1)                 | 31(100.0)   |
| Total                                   | 646(58.5)          | 312(28.3)      | 90(8.2)               | 56(5.1)                  | 1104(100.0) |

### Understanding of the community first diagnosis system

Subjects didn't have a high level of understanding of the community first diagnosis system, as shown in **Table 4**. Only 3.67% of the subjects were very familiar with the community first diagnosis system whereas 59.53% were less familiar or unfamiliar. In subjects who were unfamiliar with the community first diagnosis system, only 18.7% agree with this system while 71.70% hold an indifferent attitude. Subjects with better understanding of the community first diagnosis system were more in favor of the community first diagnosis system ( $\chi^2=177.805$ ,  $P<0.0001$ ). There is a linear trend between the understanding and agreement on the community first diagnosis. ( $\chi^2=145.327$ ,  $P<0.0001$ ).

**Table 4 Analysis of the understanding and agreement on the community first diagnosis system(n, %)**

| Whether understanding community first | agree     | disagree  | Doesn't matter | Total       |
|---------------------------------------|-----------|-----------|----------------|-------------|
| Very familiar                         | 32 (58.2) | 10 (18.2) | 13 (23.6)      | 55 (3.67)   |
| Quite familiar                        | 99 (61.9) | 16 (10.0) | 45 (28.1)      | 160 (10.67) |

|                     |            |           |            |             |
|---------------------|------------|-----------|------------|-------------|
| Moderately familiar | 221 (56.4) | 32 (8.2)  | 139 (35.5) | 392 (26.13) |
| Less familiar       | 210 (42.3) | 64 (12.9) | 223 (44.9) | 497 (33.13) |
| Unfamiliar          | 74 (18.7)  | 38 (9.6)  | 284 (71.7) | 396 (26.40) |

### Main factors affecting participants' preference of medical institution

We established two logistic regression models to explore the factors on the selection of medical institution. The independent variables and their definitions are the same, while the dependent variables are different, which were the actual and expected first medical institution in model 1 and 2, respectively.

Dependent variable is further classified in two categories, with street-level hospital, community health service center and private hospital as "0", municipal and district-level hospitals as "1". Independent variables, including age, education, occupation, census register, marital status, monthly income, housing conditions and medical insurance, were selected from statistically significant single factor analysis on the preferred first medical institution. Occupation and housing conditions were dummified, with other occupation, other housing condition as a reference. Other independent variables including  $\leq 20$  years, junior high school and below, Shenzhen household registration, unmarried, monthly income  $\leq 3000$  and uninsured as the reference.

In model 1, education, household registration and monthly income affected subjects' actual medical institution. There was a statistically significant difference of the regression equation ( $\chi^2=11.95$ ,  $P = 0.001$ ), with  $-2\text{Log}=1357.646$  and correction coefficient of determination  $r^2=0.505$ . Education, household registration and monthly income can explain 65.5% of the reasons on the subjects' choice actual first medical institution. Subjects with higher the education level, higher the monthly income level, were more inclined to choose municipal or district-level hospitals. Compared with Shenzhen household registration, non-Shenzhen household registration was more inclined to choose street-level hospitals and community health service centers, as shown in **Table 5**.

In model 2, occupation, medical insurance levels and household registration affected subjects' expected medical institution. There was a statistically difference of the logistic regression, with  $-2\text{Log}=830.499$  ( $\chi^2=15.130$ ,  $P = 0.034$ ). The prediction accuracy rate is 86.8%. Subjects with higher medical insurance levels were more inclined to choose city-level or district-level hospitals. Compared with Shenzhen household registration, non-Shenzhen household registration was more inclined to choose street hospitals and community health service centers, as shown in **Table 5**.

**Table 5 Logistics regression analysis of the factors affecting subjects' actual and expected first medical institution.**

|                    | Variable          | <i>b</i> | <i>S<sub>b</sub></i> | Wald $\chi^2$ | <i>P</i> | <i>OR</i> | <i>OR 95% CI</i> |
|--------------------|-------------------|----------|----------------------|---------------|----------|-----------|------------------|
|                    | Constant          | -0.176   | 0.346                | 0.260         | 0.610    | 0.838     | -                |
| Actual selection   | Education         | 0.258    | 0.075                | 11.838        | 0.001    | 1.295     | 1.118, 1.500     |
|                    | Census status     | -0.632   | 0.138                | 20.883        | 0.000    | 0.532     | 0.405, 0.697     |
|                    | Monthly income    | 0.343    | 0.073                | 21.747        | 0.000    | 1.409     | 1.220, 1.627     |
|                    | Constant          | 2.462    | 0.438                | 31.552        | 0.000    | 11.732    | -                |
|                    | Occupation        | -        | -                    | 14.843        | 0.038    | -         | -                |
|                    | Occupation (1)    | 1.151    | 0.453                | 6.441         | 0.011    | 3.160     | 1.299, 7.684     |
|                    | Occupation (2)    | 0.222    | 0.335                | 0.442         | 0.506    | 1.249     | 0.648, 2.406     |
|                    | Occupation (3)    | 0.793    | 0.402                | 3.899         | 0.048    | 2.211     | 1.006, 4.859     |
| Expected selection | Occupation (4)    | 0.710    | 0.365                | 3.792         | 0.052    | 2.035     | 0.995, 4.159     |
|                    | Occupation (5)    | 0.995    | 0.384                | 6.721         | 0.010    | 2.705     | 1.275, 5.742     |
|                    | Occupation (6)    | 0.484    | 0.322                | 2.264         | 0.132    | 1.623     | 0.864, 3.050     |
|                    | Occupation (7)    | 0.007    | 0.465                | 0.000         | 0.988    | 1.007     | 0.405, 2.505     |
|                    | Census register   | -0.457   | 0.221                | 4.270         | .039     | 0.633     | 0.410, 0.977     |
|                    | Medical insurance | -0.161   | 0.082                | 3.846         | .050     | 0.851     | 0.725, 1.000     |

## Discussion

This study demonstrated the preference and associated factors of choosing a medical institution for the first visit in Shenzhen citizens. Generally, over 50% of the subjects were willing to select municipal and district-level medical institutions for the first visit. Those with high educational level, or high-income levels, or Shenzhen census register, were more inclined to choose high-level medical institutions. Over 70% of the subjects considered medical technology and convenience as the main factors in choosing a medical institution. If feeling unwell, main factors on the subjects' preferred medical institution and their actual first visit were different. When conditions permit, occupation, types of medical insurance participation, and household registration are the main factors that affected subjects' expected medical service selection. In addition, education, household registration and monthly income affected subjects' actual first medical service selection.

### Medical technology and convenience

The finding that medical technology and convenience are the main factors in choosing

1  
2  
3 a medical institution, is consistent with previous studies in which participants indicated  
4 to prioritise organizational factors.<sup>10</sup> A previous study also indicated that compared  
5 with the situation in the other regions in China, residents in Shenzhen can access general  
6 hospitals timelier, but inaccessibility to medical resources among communities existed  
7 in this first-tier Chinese city.<sup>3</sup> The number of beds per 1,000 people in Shenzhen at the  
8 end of 2019 was 3.83, far below the national average of 6.30 and Shanghai of 10.42.<sup>11</sup>  
9 In addition, Shenzhen also lagged behind Shanghai in terms of the overall spatial  
10 accessibility, where the score of physicians was above 2 in half of the districts and even  
11 more than 9 in some districts.<sup>3, 12</sup> Moreover, more than 97% of the residents in Shanghai  
12 had access to a medical facility including community healthcare centers within a 15-  
13 min walking distance.<sup>13</sup>  
14  
15  
16  
17  
18

### 19 **Dilemma of first diagnosis at the community health service center**

20  
21 Some of our findings may reflect initial effects of reform implementation. Under the  
22 current hierarchical diagnosis and treatment system, subjects in the current study were  
23 not very familiar with the first diagnosis system of community health service centers,  
24 most of whom even didn't know whether the community health service center has the  
25 ability of the first diagnosis and question about the service capacity. These phenomena  
26 will undoubtedly hinder the implementation of the hierarchical diagnosis and treatment  
27 system and it is also not conducive for residents to effectively cooperate with the  
28 implementation of the hierarchical diagnosis and treatment system.  
29  
30  
31  
32

33 It should be noted that subjects' willingness on community health service centers was  
34 not strong. Only 21.1% of the subjects would choose community health center as their  
35 initial visit, inconsistent with a previous study conducted in Shenzhen in which the  
36 willingness on community health centers was high among patients with health  
37 insurance, who were female, and who were familiar with gatekeeper policy.<sup>14</sup> The main  
38 reason was the distrust of the community health centers. In response to subjects'  
39 questioning the level of medical technology in primary medical institutions, it is  
40 strongly recommended to establish a standardized general practitioner training system  
41 in a planned and step-by-step manner to train high-quality general practitioners through  
42 multiple channels. At the same time, in order to fully utilized the role of general  
43 practitioners as the "gatekeeper", the basic medical and public health service capabilities  
44 should also be improved. On the one hand, it is highly recommended to increase the  
45 publicity of the hierarchical diagnosis and treatment system via various approaches. On  
46 the other hand, the capacity of community health services should be improved to meet  
47 the medical needs of the public as well as the allocation of medical resources should be  
48 optimized, especially to distribute sufficient resources to community health service  
49 centers, including the types and quantities of medicines.  
50  
51  
52  
53  
54  
55

### 56 **Disease severity may affect patients' preference**

57  
58 Although we reported that, if feeling unwell, main factors on the subjects' expected  
59  
60

1  
2  
3 and actual first visit were different, we failed to further explore the influences of the  
4 diseases severity. A previous study indicated that the distance is of less importance as  
5 illness is more severe.<sup>15</sup> Self-assessment of disease severity may also play a special and  
6 important role in the selection of first medical service. In case of perceived minor or  
7 sever illness, factors influencing choice of medical service on urban and rural  
8 respondents were different.<sup>16</sup> In the case of perceived minor illness, no matter rural or  
9 urban residents, stated many factors which caused them not to access the system at the  
10 lower, primary level, among whom, indicated to choose it nevertheless because of the  
11 higher quality of care outweighing the higher cost of transportation, service and  
12 medication, as well as inconvenience of the complex physical environment.

### 17 **Income and medical investment affect participants' selection**

20 Subjects with high educational level, high monthly income level, or favorable housing  
21 conditions, such as self-purchased or rented commercial houses, are more inclined to  
22 choose high-level medical institutions for the first visit. These findings are consistent  
23 with a previous systematic review which also revealed that higher income, higher  
24 education, and urbanization are associated with access at high levels.<sup>9</sup> However, take  
25 the government capital investment in health services into account, it is vital important  
26 to further increase investment in medical and health services as well as pay more  
27 attention to population's health. Shenzhen's medical and health resources don't match  
28 the status and role of its first-tier cities, especially its economy volume. The investment  
29 in medical and health services in Shenzhen is far from enough. In the whole year of  
30 2019, the investment of medical and health services in Shenzhen is 33.548 billion yuan,  
31 accounting for 7.37% of local fiscal expenditures. Although the investment in health is  
32 increasing year by year, the total health expenditure as a percentage of GDP in  
33 Shenzhen only accounted for 1.25, far below that of 5.20 in Guangdong and 6.43 in the  
34 whole nation. In addition, the per capita health service expenditure is 2496.35 yuan,<sup>1</sup>  
35 far below the national average of 4702.8 and Guangdong average of 4581.96.<sup>11</sup> By the  
36 end of 2019, the number of certified (assistant) doctors per 1000 population in  
37 Shenzhen is 3.01,<sup>1</sup> far below the national and Guangdong Provincial city average of  
38 both 4.10.<sup>11</sup>

### 46 **Limitations**

48 Several limitations of this study need to be addressed. **First**, although the study sample  
49 was representative as a result of randomly sampling according to the proportion of  
50 population from all districts of Shenzhen, owing to the large floating population in  
51 Shenzhen, the interpretation and extrapolation of the characteristics of preference for  
52 the first medical service to the entire city population should be with great caution.  
53 **Second**, we did not further explore the diseases severity on the patients' preference of  
54 their initial visit. Self-assessment of disease severity may play a special and important  
55 role in the selection of first medical service. Convenience, such as the distance, is of  
56 less importance as illness is more severe.<sup>15</sup> Third, as the study focused on the  
57  
58  
59  
60

1  
2  
3 participants of 18 and above, we could not collect information on the preference of the  
4 first medical service from children or their parents. Shenzhen is a city with young  
5 population age structure and due to the two-child policy recently imposed by the  
6 Chinese government, pediatrician shortage has become an increasingly important issues,  
7 parents' choice to a high-level medical institution may be affected due to the shortage  
8 of specialists.<sup>17</sup> **Last but not least**, although the subjects were randomly selected from  
9 10 districts, we did not consider the effects of geographical characteristics on the  
11 residents' preference of first medical service. Shenzhen is a long and narrow city from  
12 east to west and a shorter city from north to south, the allocation and accessibility of  
13 medical resources may, to a certain extent, affect people's willingness and preference  
14 to medical service.  
15  
16  
17

## 18 19 **Conclusion**

20  
21  
22 In general, over 50% of the subjects are willing to select municipal and district-level  
23 medicals institutions for the first visit. Those with high educational level, or high-  
24 income levels, or Shenzhen census register, are more inclined to choose high-level  
25 medical institutions for first visit. Medical technology and convenience were  
26 considered as the main factors in choosing a medical institution.  
27  
28

## 29 30 **Acknowledgements**

31  
32  
33 We acknowledge the participance of each subject. We also would like to thank  
34 Professor Yang Zheng and Professor Huang Zhigang for their help and support in the  
35 study design and data collection.  
36  
37

## 38 39 **Contributors**

40  
41  
42 DJ and XZ conceived and designed the study. XJ, LK, LX and HS conducted the field  
43 work. DJ and ZX conducted the field work and did the initial analyses of the data and  
44 wrote the manuscript. CH commented on the interpretation of the data. DJ, XJ and XJ  
45 revised and reviewed the manuscript. All authors have seen and approved the final  
46 version the abstract for publication.  
47  
48

## 49 50 **Funding**

51  
52  
53 This study was partly supported by PhD Start-up Fund of Guangdong Medical  
54 University (No: B2019007), Guangdong Province Educational Science "Thirteenth  
55 Five-Year Plan" Project(No: 2019GXJK226 ) , Humanities and Social Sciences  
56 Planning Project of the Ministry of Education ( No: 17YJAZH094 ) and Special  
57 project of Guangdong Provincial Department of Education(No: 2020KZDZX1106) .  
58  
59  
60

## References

1. Shenzhen Statistics Bureau, Survey Office of the National Bureau of Statistics in Shenzhen. Shenzhen Statistical Year Book 2020. Beijing: China Statistics Press; 2020.
2. Qiao L, Li Y, Liu Y, et al. The spatio-temporal change of China's net floating population at county scale from 2000 to 2010. *Asia Pacific Viewpoint*. 2016;57(3):365-78.
3. Zhu L, Zhong S, Tu W, et al. Assessing Spatial Accessibility to Medical Resources at the Community Level in Shenzhen, China. *International journal of environmental research and public health*. 2019;16(2):242.
4. Yip W, Hsiao W. Harnessing the privatisation of China's fragmented health-care delivery. *Lancet*. 2014;384(9945):805-18.
5. Wu D, Lam TP. Underuse of Primary Care in China: The Scale, Causes, and Solutions. *J Am Board Fam Med*. 2016;29(2):240-7.
6. Li X, Lu J, Hu S, et al. The primary health-care system in China. *Lancet*. 2017;390(10112):2584-94.
7. Wang Y, Fang M, Wang Y. How to decrease violence against doctors in China? *Int J Cardiol*. 2016;211:66.
8. Liu GG, Vortherms SA, Hong X. China's Health Reform Update. *Annu Rev Public Health*. 2017;38:431-48.
9. Liu Y, Kong Q, Yuan S, et al. Factors influencing choice of health system access level in China: A systematic review. *PLoS One*. 2018;13(8):e0201887.
10. Wu D, Lam TP, Lam KF, et al. Health reforms in china: the public's choices for first-contact care in urban areas. *Fam Pract*. 2017;34(2):194-200.
11. National Health Commission. China Health Statistics Yearbook 2020. Beijing: Peking Union Medical College Press; 2020.
12. Xiong X, Jin C, Chen H, et al. Using the Fusion Proximal Area Method and Gravity Method to Identify Areas with Physician Shortages. *PLoS One*. 2016;11(10):e0163504.
13. Shanghai Urban Planning and Land Resources Administration Bureau. Shanghai Planning Guidance of 15-minute Community-Life Circle[EB/OL]. (2016-09-02)[2021-07-01]. [http://hd.ghzyj.sh.gov.cn/2009/zcfg/cxgh/202008/t20200828\\_981923.html](http://hd.ghzyj.sh.gov.cn/2009/zcfg/cxgh/202008/t20200828_981923.html)
14. Gan Y, Li W, Cao S, et al. Patients' Willingness on Community Health Centers as Gatekeepers and Associated Factors in Shenzhen, China: A Cross-sectional Study. *Medicine*. 2016;95(14):e3261.
15. Qian D, Pong RW, Yin A, et al. Determinants of health care demand in poor, rural China: the case of Gansu Province. *Health Policy Plan*. 2009;24(5):324-34.
16. Liu Y, Zhong L, Yuan S, et al. Why patients prefer high-level healthcare facilities: a qualitative study using focus groups in rural and urban China. *BMJ Glob Health*. 2018;3(5):e000854.
17. Hu KJ, Sun ZZ, Rui YJ, et al. Shortage of paediatricians in China. *Lancet*. 2014;383(9921):954.

STROBE Statement—Checklist of items that should be included in reports of *cross-sectional studies*

|                              | Item No | Recommendation                                                                                                                                                                                    | Page number |
|------------------------------|---------|---------------------------------------------------------------------------------------------------------------------------------------------------------------------------------------------------|-------------|
| <b>Title and abstract</b>    | 1       | (a) Indicate the study's design with a commonly used term in the title or the abstract                                                                                                            | 1, 2, 3     |
|                              |         | (b) Provide in the abstract an informative and balanced summary of what was done and what was found                                                                                               | 2, 3        |
| <b>Introduction</b>          |         |                                                                                                                                                                                                   |             |
| Background/rationale         | 2       | Explain the scientific background and rationale for the investigation being reported                                                                                                              | 4, 5        |
| Objectives                   | 3       | State specific objectives, including any prespecified hypotheses                                                                                                                                  | 6           |
| <b>Methods</b>               |         |                                                                                                                                                                                                   |             |
| Study design                 | 4       | Present key elements of study design early in the paper                                                                                                                                           | 6           |
| Setting                      | 5       | Describe the setting, locations, and relevant dates, including periods of recruitment, exposure, follow-up, and data collection                                                                   | 6           |
| Participants                 | 6       | (a) Give the eligibility criteria, and the sources and methods of selection of participants                                                                                                       | 6           |
| Variables                    | 7       | Clearly define all outcomes, exposures, predictors, potential confounders, and effect modifiers. Give diagnostic criteria, if applicable                                                          | N/A         |
| Data sources/<br>measurement | 8*      | For each variable of interest, give sources of data and details of methods of assessment (measurement). Describe comparability of assessment methods if there is more than one group              | 6, 7        |
| Bias                         | 9       | Describe any efforts to address potential sources of bias                                                                                                                                         | 6           |
| Study size                   | 10      | Explain how the study size was arrived at                                                                                                                                                         | 6           |
| Quantitative variables       | 11      | Explain how quantitative variables were handled in the analyses. If applicable, describe which groupings were chosen and why                                                                      | 7           |
| Statistical methods          | 12      | (a) Describe all statistical methods, including those used to control for confounding                                                                                                             | 7           |
|                              |         | (b) Describe any methods used to examine subgroups and interactions                                                                                                                               | 7           |
|                              |         | (c) Explain how missing data were addressed                                                                                                                                                       | 7           |
|                              |         | (d) If applicable, describe analytical methods taking account of sampling strategy                                                                                                                | 6           |
|                              |         | (e) Describe any sensitivity analyses                                                                                                                                                             | N/A         |
| <b>Results</b>               |         |                                                                                                                                                                                                   |             |
| Participants                 | 13*     | (a) Report numbers of individuals at each stage of study—eg numbers potentially eligible, examined for eligibility, confirmed eligible, included in the study, completing follow-up, and analysed | N/A         |
|                              |         | (b) Give reasons for non-participation at each stage                                                                                                                                              | N/A         |
|                              |         | (c) Consider use of a flow diagram                                                                                                                                                                | N/A         |
| Descriptive data             | 14*     | (a) Give characteristics of study participants (eg                                                                                                                                                | 8           |



|                          |     |                                                                                                                                                                                                              |            |
|--------------------------|-----|--------------------------------------------------------------------------------------------------------------------------------------------------------------------------------------------------------------|------------|
|                          |     | demographic, clinical, social) and information on exposures and potential confounders                                                                                                                        |            |
|                          |     | (b) Indicate number of participants with missing data for each variable of interest                                                                                                                          | N/A        |
| Outcome data             | 15* | Report numbers of outcome events or summary measures                                                                                                                                                         | 8, 9       |
| Main results             | 16  | (a) Give unadjusted estimates and, if applicable, confounder-adjusted estimates and their precision (eg, 95% confidence interval). Make clear which confounders were adjusted for and why they were included | 23, 24, 25 |
|                          |     | (b) Report category boundaries when continuous variables were categorized                                                                                                                                    | 8, 9       |
|                          |     | (c) If relevant, consider translating estimates of relative risk into absolute risk for a meaningful time period                                                                                             | N/A        |
| Other analyses           | 17  | Report other analyses done—eg analyses of subgroups and interactions, and sensitivity analyses                                                                                                               | 9-23       |
| <b>Discussion</b>        |     |                                                                                                                                                                                                              |            |
| Key results              | 18  | Summarise key results with reference to study objectives                                                                                                                                                     | 25         |
| Limitations              | 19  | Discuss limitations of the study, taking into account sources of potential bias or imprecision. Discuss both direction and magnitude of any potential bias                                                   | 30, 31     |
| Interpretation           | 20  | Give a cautious overall interpretation of results considering objectives, limitations, multiplicity of analyses, results from similar studies, and other relevant evidence                                   | 25-30      |
| Generalisability         | 21  | Discuss the generalisability (external validity) of the study results                                                                                                                                        | 31         |
| <b>Other information</b> |     |                                                                                                                                                                                                              |            |
| Funding                  | 22  | Give the source of funding and the role of the funders for the present study and, if applicable, for the original study on which the present article is based                                                | 32         |

\*Give information separately for exposed and unexposed groups.

**Note:** An Explanation and Elaboration article discusses each checklist item and gives methodological background and published examples of transparent reporting. The STROBE checklist is best used in conjunction with this article (freely available on the Web sites of PLoS Medicine at <http://www.plosmedicine.org/>, Annals of Internal Medicine at <http://www.annals.org/>, and Epidemiology at <http://www.epidem.com/>). Information on the STROBE Initiative is available at [www.strobe-statement.org](http://www.strobe-statement.org).

# BMJ Open

## Patient preference and attitude of first medical service in Shenzhen, China: a cross-sectional study

|                                 |                                                                                                                                                                                                                                                                                                                                                                                                                                                                                                                                                                                                                                                                                                                                                  |
|---------------------------------|--------------------------------------------------------------------------------------------------------------------------------------------------------------------------------------------------------------------------------------------------------------------------------------------------------------------------------------------------------------------------------------------------------------------------------------------------------------------------------------------------------------------------------------------------------------------------------------------------------------------------------------------------------------------------------------------------------------------------------------------------|
| Journal:                        | <i>BMJ Open</i>                                                                                                                                                                                                                                                                                                                                                                                                                                                                                                                                                                                                                                                                                                                                  |
| Manuscript ID                   | bmjopen-2021-057280.R1                                                                                                                                                                                                                                                                                                                                                                                                                                                                                                                                                                                                                                                                                                                           |
| Article Type:                   | Original research                                                                                                                                                                                                                                                                                                                                                                                                                                                                                                                                                                                                                                                                                                                                |
| Date Submitted by the Author:   | 28-Jan-2022                                                                                                                                                                                                                                                                                                                                                                                                                                                                                                                                                                                                                                                                                                                                      |
| Complete List of Authors:       | Zhao, Xinyu; Guangdong Medical University School of Public Health, Epidemiology and Statistics<br>Xiao, Junhui; Guangdong Medical University<br>Chen, Huida; Guangdong Medical University, Department of Epidemiology and Statistics<br>Lin, Kena; Guangdong Medical University, Department of Epidemiology and Statistics<br>Li, Xiaoman; Guangdong Medical University, Department of Epidemiology and Statistics<br>Zeng, Zhiwen; Guangdong Medical University, Department of Epidemiology and Statistics<br>Huang, Shuyun; Guangdong Medical University, Department of Epidemiology and Statistics<br>Xie, Zhikui; Shenzhen Academy of Social Sciences<br>Du, Jinlin; Guangdong Medical University, Department of Epidemiology and Statistics |
| <b>Primary Subject Heading</b>: | Public health                                                                                                                                                                                                                                                                                                                                                                                                                                                                                                                                                                                                                                                                                                                                    |
| Secondary Subject Heading:      | Health policy, Public health, Epidemiology                                                                                                                                                                                                                                                                                                                                                                                                                                                                                                                                                                                                                                                                                                       |
| Keywords:                       | EPIDEMIOLOGY, Health policy < HEALTH SERVICES ADMINISTRATION & MANAGEMENT, PUBLIC HEALTH                                                                                                                                                                                                                                                                                                                                                                                                                                                                                                                                                                                                                                                         |
|                                 |                                                                                                                                                                                                                                                                                                                                                                                                                                                                                                                                                                                                                                                                                                                                                  |

SCHOLARONE™  
Manuscripts

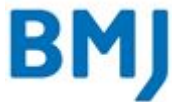

I, the Submitting Author has the right to grant and does grant on behalf of all authors of the Work (as defined in the below author licence), an exclusive licence and/or a non-exclusive licence for contributions from authors who are: i) UK Crown employees; ii) where BMJ has agreed a CC-BY licence shall apply, and/or iii) in accordance with the terms applicable for US Federal Government officers or employees acting as part of their official duties; on a worldwide, perpetual, irrevocable, royalty-free basis to BMJ Publishing Group Ltd ("BMJ") its licensees and where the relevant Journal is co-owned by BMJ to the co-owners of the Journal, to publish the Work in this journal and any other BMJ products and to exploit all rights, as set out in our [licence](#).

The Submitting Author accepts and understands that any supply made under these terms is made by BMJ to the Submitting Author unless you are acting as an employee on behalf of your employer or a postgraduate student of an affiliated institution which is paying any applicable article publishing charge ("APC") for Open Access articles. Where the Submitting Author wishes to make the Work available on an Open Access basis (and intends to pay the relevant APC), the terms of reuse of such Open Access shall be governed by a Creative Commons licence – details of these licences and which [Creative Commons](#) licence will apply to this Work are set out in our licence referred to above.

Other than as permitted in any relevant BMJ Author's Self Archiving Policies, I confirm this Work has not been accepted for publication elsewhere, is not being considered for publication elsewhere and does not duplicate material already published. I confirm all authors consent to publication of this Work and authorise the granting of this licence.

# Patient preference and attitude of first medical service in Shenzhen, China: a cross-sectional study

Zhao Xinyu,<sup>1</sup> Xiao Junhui,<sup>2</sup> Chen Huida,<sup>1</sup> Lin Kena,<sup>1</sup> Li Xiaoman,<sup>1</sup> Zeng Zhiwen,<sup>1</sup> Huang, Shuyun,<sup>1</sup> Xie Zhikui,<sup>3\*</sup> Du Jinlin<sup>1\*</sup>

<sup>1</sup> Department of Epidemiology and Statistics, School of Public Health, Guangdong Medical University, Dongguan, Guangdong, 52300, China

<sup>2</sup> Institute of Health Regulations and Policy, School of Humanities and Management, Guangdong Medical University, Dongguan, Guangdong, 52300, China

<sup>3</sup> Shenzhen Academy of Social Sciences, Shenzhen, Guangdong, 518028, China

\*Xie Zhikui and Du Jinlin contribute equally to this work

Correspondence to Dr Du Jinlin; dujinlin@gdmu.edu.cn

Department of Epidemiology and Statistics, School of Public Health, Guangdong Medical University, Dongguan, Guangdong, 52300, China

Word Count: 5711

## Abstract

**Objective:** To explore the characteristics of Shenzhen citizens' preference of their first medical institution and their influencing factors at various medical levels and understand their attitudes towards community health services.

**Design:** Cross-sectional survey

**Participants:** 1612 subjects with the age of 18 and above were stratified randomly sampled among 10 districts in Shenzhen and conducted with a self-designed questionnaire. The effective response rate of questionnaires was 93.05%. All patients participated in the study voluntarily, provided written informed consent, and possessed the ability to complete the questionnaire.

**Main outcome measures:** We measured and compared the participants' expected and actual preference of their first medical service and their influencing factors at various medical levels.

**Results:** Over 50% of the subjects preferred municipal and district hospitals as their first choice and 27.5% would choose medical institutions depending on specific circumstances. Univariate analysis indicated that age, education, income, medical insurance, housing conditions and census register were significant in terms of actual and expected preferred first medical institution. Medical technology and convenience were the main factors in choosing a medical institution. Main factors on the subjects' actual and expected preferred medical institution were different. With actual preferred

1  
2  
3 38 first medical institution as dependent variable, education, household registration and  
4 39 monthly income were the main factors ( $\chi^2=11.95$ ,  $P = 0.001$ ); whereas with expected  
5 40 preferred first medical institution as dependent variable, occupation, types of medical  
6 41 insurance participation and household registration were the main factors ( $\chi^2=15.130$ ,  
7 42  $P = 0.034$ ).

8  
9  
10 43 **Conclusion:** Main factors on the subjects' preferred medical institution and their  
11 44 actual first visit were different. Patients with high education, high-income, or census  
12 45 register, preferred high-level medical institutions for the first visit.

13  
14  
15 46 **Keywords:** healthcare preference, medical service, influential factor  
16  
17  
18  
19 47  
20  
21 48  
22  
23  
24 49  
25  
26 50  
27  
28  
29 51  
30  
31 52  
32  
33  
34 53  
35  
36 54  
37  
38  
39 55  
40  
41 56  
42  
43  
44 57  
45  
46 58  
47  
48  
49 59  
50  
51 60  
52  
53  
54 61  
55  
56 62  
57  
58  
59  
60

1  
2  
3  
4 63

5  
6 64  
7  
8  
9

10 65 **Strengths and limitations**  
11  
12

13 66 ▪ Characteristics of patients' preference of the first medical institution and their  
14  
15 67 influencing factors at various medical levels and understand their attitudes  
16  
17 68 towards community health services were demonstrated.

18  
19 69 ▪ Individuals with high educational level, or high-income levels, or census register,  
20  
21 70 are more inclined to choose high-level medical institutions for the first visit.

22  
23 71 ▪ Does not consider the effects of participants' medical conditions on the selection  
24  
25 72 of medical institutions.

26  
27 73 ▪ Does not consider the effects of geographical characteristics on the residents'  
28  
29 74 preference of first medical service.  
30

31 75  
32

33 76  
34  
35

36 77  
37  
38

39 78  
40

41 79  
42

43 80  
44

45 81  
46

47 82  
48

49 83  
50

51 84  
52

53 85  
54

55 86  
56  
57  
58  
59  
60

## 87 Introduction

88 Hierarchical diagnosis and treatment is an important part of China's medical system  
89 reform, which initiated in 2015, aims to direct patient flow by changes in coverage  
90 and diversifying reimbursement rates.<sup>1</sup> Medical institutions were classified into 3 tiers  
91 according to their priority and difficulty to treat; namely, primary medical institution,  
92 secondary hospital, and tertiary hospital. <sup>2</sup> This system aims to allow different tiers of  
93 medical institutions to undertake diagnosis and treatment tasks based on their  
94 specialized functions and service capacities, thus, patients can be assigned to different  
95 tiers of medical institutions appropriately, and the difficulty in getting access to  
96 medical services can be mitigated.<sup>3</sup> Meanwhile, patients are also encouraged to go  
97 firstly to primary institutions, where those with severe diseases will be referred to  
98 secondary or tertiary hospitals if necessary, and patients will turn back to primary  
99 medical institutions for rehabilitation when they are in stable condition. However, the  
100 Chinese healthcare system does not involve a strict general practitioner and referral  
101 system, and patient preference and choice of healthcare providers are influenced  
102 mainly by personal willingness to seek medical care. In addition, due to the problems  
103 of barriers to medical insurance reimbursement, hospitals' distribution of benefits,  
104 patients' preferences for seeking medical treatment,<sup>4, 5</sup> the role of primary medical  
105 institutions has not been fully exerted and the hierarchical diagnosis and treatment  
106 system has not been fully established.

107 In some countries, health services are delivered in a multi-level system, which  
108 requires a patient referral procedure by coordinating health services between different  
109 levels of health care providers.<sup>6</sup> A good and famous example is the United Kingdom,  
110 one of the first countries to follow it strictly, which promulgated the national health  
111 service law in 1948 to establish the National Health Service (NHS).<sup>7</sup> Although  
112 different countries have different models, all maintain a structure that clearly divides  
113 labor in the medical service system, with primary medical and health institutions as  
114 the core and large hospitals as the auxiliary bodies.<sup>8</sup> Compared with countries that  
115 directly sought the services of specialist doctors, countries with "gatekeeper" system  
116 had a lower proportion of the cost of medical services to the gross national product. <sup>9</sup>  
117 Shenzhen, as the youngest first-tier city in China, may be slightly different from other  
118 first-tier cities. In addition to its impressive gross domestic product growth and rapid  
119 economic development, there are unique challenges in terms of the population size  
120 and demographic structure, resource allocation. For example, with continuous  
121 population growth, the non-resident population, generally characterized by low  
122 education levels, low incomes, low residential stability, and young age,<sup>10</sup> accounted  
123 for 63% of the entire population by the end of 2019. Because of high property prices,  
124 most non-residents had to purchase or rent self-built or village houses instead.  
125 Gradually and eventually, a special spatial pattern occurred, which might cause  
126 differences in the choice of medical service, compared with the residents.<sup>11</sup>  
127 In addition, compared with the rapid economic and population growths, Shenzhen is  
128 suffering from a conspicuous insufficiency of medical resources. The medical

1  
2  
3 129 expenditure in 2018 was 28.1 billion yuan, only accounting for 1.1% of GDP, far  
4 130 lower than the national average (6.43%). The number of beds per 1,000 people in  
5 131 Shenzhen at the end of 2019 was 3.83 , also far below the national average of 6.30. In  
6 132 China, healthcare is provided almost exclusively by state-owned public general  
7 133 hospitals at the primary, secondary, and tertiary levels and it is well appreciated that  
8 134 the tertiary hospital has the most advanced services capacity, followed by the  
9 135 secondary hospital and primary medical institution. Under these circumstances, as  
10 136 citizens are free to choose healthcare facilities without being restricted by a  
11 137 gatekeeping mechanism, they may bypass primary care and choose these higher-level  
12 138 facilities regardless of disease severity.<sup>12-14</sup> According to the China health statistics  
13 139 yearbook, outpatient services for primary medical and health institutions increased by  
14 140 2%, and by 49% for tertiary hospitals, between 2013 and 2018.<sup>15</sup> These statistics  
15 141 demonstrate that patients shop doctors (from primary providers and large hospitals) in  
16 142 a chaotic manner, there is an insufficient service capacity at primary medical and  
17 143 health institutions, and there is a continued overcrowding in China's hospitals.<sup>16, 17</sup>  
18 144 There were 3,492 medical and health institutions in Shenzhen in 2017, including 610  
19 145 community health service centers. Although 13.96 million people were covered by  
20 146 basic medical insurance and over 4 million residents signed family doctor service  
21 147 agreements, the proportion of citizens who choose to seek medical treatment in  
22 148 community health service center was relatively low, accounting for only about 38%.<sup>18</sup>  
23 149 <sup>19</sup>A large number of patients would rather queue up in higher-level hospitals than go  
24 150 to the nearby primary medical institutions. Thus, to improve the implementation  
25 151 efficiency of the hierarchical diagnosis and treatment system, it seems quite necessary  
26 152 to understand the preference and attitude of their medical institution and the  
27 153 associated influencing factors.  
28 154 To the best of our knowledge, previous studies regarding the preference or attitude of  
29 155 medical choice were mainly focused on the actual health-seeking behavior<sup>20-22</sup>, which  
30 156 was defined as the actions taken by individuals who perceive they have an illness to  
31 157 obtain a suitable remedy.<sup>23</sup> This behavior involves a series of decision-making  
32 158 processes governed by both individual characteristics, beliefs and provider-related  
33 159 features. During this process, decisions on whether to seek treatment, from whom to  
34 160 seek treatment, what kind of treatment to seek, as well as how many healthcare  
35 161 resources to use are usually made. Thus, in theory, an individual's healthcare needs do  
36 162 not necessarily turn into effective demand. Similarly, the expected medical institution  
37 163 for an individual's first consultation may be different from the actual selection. The  
38 164 exploration of factors on expected and actual first medical institution may, to some  
39 165 extent, help us determine and figure out the differences between individual preference  
40 166 and attitude of the medical institution, and their actual healthcare-seeking behaviors,  
41 167 which is very crucial for strengthening the hierarchical diagnosis and treatment  
42 168 system, as it also concerns the effective allocation and rational use of medical  
43 169 resources.  
44 170 A previous systematic review analyzed a considerable body of studies and identified  
45 171 factors on the selection of healthcare, such as individual, facility, context and  
46 172 composite factors, influencing facility choice in China.<sup>22</sup> However, as China's



1  
2  
3 173 youngest city, Shenzhen may be different from traditional cities due to its  
4 174 characteristics, such as living spaces and population composition. In order to better  
5 175 promote the reform of the hierarchical diagnosis and treatment system, it is vital  
6 176 important to first understand the citizens' choices of healthcare provider types and the  
7 177 associated factors. Therefore, the current study aims to: (1) explore the citizens'  
8 178 expected and actual preference of first medical service and their influencing factors at  
9 179 various medical levels; (2) understand citizens' views and attitudes towards  
10 180 community health services.

## 15 181 **Methods**

### 18 182 **Participants**

19 183 Subjects were selected according to the outpatient records of Shenzhen Medical  
20 184 System in 2017. According to the pilot study, the awareness rate of the hierarchical  
21 185 diagnosis and treatment system was 40%, with the maximum permissible error of  
22 186 2.5% and confidential level of 95%, the sample size was calculated as 1475. Taking  
23 187 into account the invalid questionnaire and expansion of sample size by 9%, a total of  
24 188 1612 subjects were finally investigated. Stratified sampling was performed and the  
25 189 number of the participants varied according to the number of residents in each district.  
26 190 Finally, the number of participants from each district were 210(14.0%) in Futian  
27 191 district, 210(14.0%) in Luohu district, 210(14.0%) in Nanshan district, 50 (3.3%) in  
28 192 Yantian district, 260 (17.3%) in Baoan district, 260(17.3%) in Longgang district,  
29 193 150(10.0%) in Longhua district, 50(3.3%) in Pingshan district, 50(3.3%) in  
30 194 Guangming district and 50(3.3%) in Dapeng new district. One resident at the age of 18  
31 195 and above was then selected from each household. The Inclusion criteria: living in  
32 196 Shenzhen for  $\geq 6$  months, agreeing to sign an informed consent form, good mental  
33 197 state and clear consciousness. Exclusion criteria: subjects suffering from severe  
34 198 mental illness or cognitive communication difficulties. All the subjects participated  
35 199 voluntarily and provided written informed consent.

### 42 200 **Data collection**

43 201 Selected subjects were first inquired by telephone to ensure that they understand and  
44 202 agree to the survey. Questionnaire entitled "Questionnaire on medical preference and  
45 203 behavior of Shenzhen residents" was conducted by face-to-face. Items were initially  
46 204 selected through literature and determined after three expert consultations. Final  
47 205 version of the questionnaire was determined after the modification from a pilot study.  
48 206 In measuring the expected preferred first medical institution, question is "If conditions  
49 207 permit, what type of medical institution would you like to choose for the first  
50 208 consultation?" with the corresponding answer "① Municipal hospitals ② District  
51 209 hospitals ③ Street hospitals ④ Private medical institutions ⑤ Community health  
52 210 service centers ⑥ Other hospitals ⑦ Depending on the situation". In measuring the  
53 211 actual preferred first medical institution, question is "If you are unwell, what type of  
54 212 medical institution did you choose?", with the corresponding answer "① Municipal

1  
2  
3 213 hospitals ②District hospitals ③Street hospitals ④Private medical institutions  
4 214 ⑤Community health service centers ⑤Other hospitals ⑦Depending on the  
5 215 situation”. The investigation was conducted by uniformly trained investigators, and  
6 216 the quality is strictly controlled throughout the whole investigation.  
7  
8  
9

## 10 217 **Statistical analysis**

11  
12  
13 218 All data were entered by two researchers simultaneously by Epidata 3.02. SPSS 25.0  
14 219 was used for data cleaning, sorting and statistical analysis. Descriptive statistics were  
15 220 used to describe participants’ characteristics. The relationships between medical  
16 221 service seeking preference and various factors were analyzed by  $\chi^2$  tests. The  
17 222 difference between the understanding of the community first consultation system and  
18 223 the approval level of the community first consultation system as also performed by  
19 224  $\chi^2$  test and linear trend test. Multivariate logistic regression analysis was performed to  
20 225 explore the factors affecting the preference of medical service. The independent  
21 226 variables were selected by the forward stepwise method with inclusion criteria of 0.05  
22 227 and exclusion of 0.10. All tests were two-way and the significance level was set at  $P$   
23 228  $<0.05$ .

## 24 229 **Ethnic statement**

25  
26  
27 230 The study was approved by the Ethics Committee of the Affiliated Hospital of  
28 231 Guangdong Medical University (ethical approval number: YJ2017045-1). All  
29 232 participants were aware of the aims and objectives of the study, informed that  
30 233 participation was voluntary and their data would remain confidential, and provided  
31 234 written informed consent.

## 32 235 **Patient and public involvement**

33  
34  
35 236 There has been no patient and/or public involvement in the study design, data analysis  
36 237 and writing of the current study. The brief results were emailed to each participant  
37 238 after the investigation.

## 38 239 **Results**

### 39 240 **Test for the questionnaire**

40 241 The reliability and validity of the questionnaire were good with an overall internal  
41 242 consistency, a Cronbach  $\alpha$  coefficient of 0.826, Kaiser-Meyer-Olkin index of 0.791  
42 243 and the cumulative contribution rate of 6 factors of 81.959%.

### 43 244 **Subjects’ characteristics**

44 245 The characteristics of the participants are shown in **Table 1**. The average age was  
45 246  $34.3 \pm 10.0$  years and the age composition were close to that of Shenzhen residents in  
46 247 2010 population census.

## 47 248 **Table 1 Basic characteristics of participants**

| Category                                        | n (%)     | Category                          | n (%)      |
|-------------------------------------------------|-----------|-----------------------------------|------------|
| <b>Sex</b>                                      |           | <b>Monthly incomes (CNY)</b>      |            |
| Male                                            | 733(48.9) | <3000                             | 158(10.5)  |
| Female                                          | 767(51.1) | 3000~                             | 479(31.9)  |
| <b>Age(years)</b>                               |           | 5000~                             | 626(41.7)  |
| <20                                             | 56(3.7)   | 10000~                            | 158(10.5)  |
| 21-30                                           | 607(40.5) | 15000~                            | 53(3.5)    |
| 31-40                                           | 520(34.7) | ≥30000                            | 26(1.7)    |
| 41-50                                           | 204(13.6) | <b>Housing conditions</b>         |            |
| ≥51                                             | 113(7.5)  | Self-purchased housing            | 351(23.4)  |
| <b>Educational level</b>                        |           | Renting policy housing            | 114(7.6)   |
| Junior high school and below                    | 222(14.8) | Renting housing in Urban Villages | 618(41.2)  |
| High school/technical secondary                 | 581(38.7) | Renting commercial housing        | 170(11.3)  |
| junior college                                  | 431(28.7) | Dormitory                         | 94(6.3)    |
| Undergraduate                                   | 242(16.1) | Others                            | 153(10.2)  |
| Post undergraduate                              | 24(1.6)   | <b>Medical insurance</b>          |            |
| <b>Occupation</b>                               |           | Level 1                           | 663(44.2)  |
| public institutions                             | 153(10.2) | Level 2                           | 336(22.4)  |
| professional and technical                      | 224(14.9) | Level 3                           | 187(12.5)  |
| Enterprise managers                             | 156(10.4) | Uninsured                         | 314(20.9)  |
| Enterprise staff                                | 208(13.9) | <b>Marital status</b>             |            |
| Individual industrial and commercial households | 228(15.2) | Single                            | 435(29.0)  |
| Worker                                          | 342(22.8) | Married                           | 1065(71.0) |
| Unemployed                                      | 53(3.5)   | <b>Census register</b>            |            |
| Others                                          | 136(9.1)  | Registered                        | 531(35.4)  |
|                                                 |           | Non-registered                    | 969(64.6)  |

#### 249 Actual and expected preferred first medical institution

250 In terms of actual first medical institution, as the proportion of choosing private  
 251 medical institution was very small and a clear stated medical preference would help  
 252 us analyze the needs and influencing factors, we excluded 25 subjects choosing

1  
2  
3 253 private medical institution, and 412 choosing medical institutions depending on  
4 254 specific circumstances. Further analysis was conducted in remaining 1063 subjects  
5 255 with specific preferences. The percentages of actual and expected preferred first  
6 256 medical institutions between sexes were shown in **Table 2**. Over 50% of the subjects  
7 257 chose municipal or district hospitals as first choice. There is no statistically significant  
8 258 difference in the actual medical institution selection among municipal, district-level,  
9 259 street-level and community health service between two sexes ( $\chi^2=5.034$ ,  $P=0.169$ ).  
10 260 Similarly, in terms of expected preferred first medical institution, as no subject would  
11 261 choose private medical institution and 396 would choose according to specific  
12 262 circumstances, we excluded these 396 subjects and further analysis was conducted in  
13 263 the remaining 1104 subjects with specific preferences. Over three-quarters of the  
14 264 subjects expected to choose municipal and district-level hospitals for the first visit.  
15 265 There was no statistically difference among 1104 subjects with specific first medical  
16 266 institution choice between two sexes ( $\chi^2=2.843$ ,  $P=0.416$ ).  
17  
18  
19  
20  
21  
22  
23  
24  
25  
26  
27  
28  
29  
30  
31  
32  
33  
34  
35  
36  
37  
38  
39  
40  
41  
42  
43  
44  
45  
46  
47  
48  
49  
50  
51  
52  
53  
54  
55  
56  
57  
58  
59  
60

267 **Table 2 Selection of actual and expected preferred medical institutions in subjects with different demographic characteristics (n, %)**

| Variables | Actual selection                  |                    |                        |                          |           | Expected selection  |                    |                        |                          |         |             |
|-----------|-----------------------------------|--------------------|------------------------|--------------------------|-----------|---------------------|--------------------|------------------------|--------------------------|---------|-------------|
|           | Municipal hospitals               | District hospitals | Street-level hospitals | Community Health Service | Total     | Municipal hospitals | District hospitals | Street-level hospitals | Community Health Service | Total   |             |
| Sex       | Male                              | 154(29.8)          | 143(27.7)              | 73(14.1)                 | 146(28.3) | 516(100.0)          | 318(59.6)          | 147(27.5)              | 38(7.1)                  | 31(5.8) | 534(100.0)  |
|           | Female                            | 162(29.6)          | 161(29.4)              | 54(9.9)                  | 170(31.1) | 547(100.0)          | 328(57.5)          | 165(28.9)              | 52(9.1)                  | 25(4.4) | 570(100.0)  |
|           | Total                             | 316(29.7)          | 304(28.6)              | 127(11.9)                | 316(29.7) | 1063(100.0)         | 646(58.5)          | 312(28.3)              | 90(8.2)                  | 56(5.1) | 1104(100.0) |
| Age       | <21                               | 6(18.8)            | 2(6.3)                 | 2(6.3)                   | 22(68.8)  | 32(100.0)           | 17(45.9)           | 10(27.0)               | 8(21.6)                  | 2(5.4)  | 37(100.0)   |
|           | 21~                               | 131(32.1)          | 112(27.5)              | 53(13.0)                 | 112(27.5) | 408(100.0)          | 262(59.3)          | 120(27.1)              | 39(8.8)                  | 21(4.8) | 442(100.0)  |
|           | 31~                               | 98(26.2)           | 121(32.4)              | 46(12.3)                 | 109(29.1) | 374(100.0)          | 211(55.5)          | 124(32.6)              | 28(7.4)                  | 17(4.5) | 380(100.0)  |
|           | 41~                               | 56(35.4)           | 44(27.8)               | 16(10.1)                 | 42(26.8)  | 158(100.0)          | 96(62.7)           | 42(27.5)               | 7(4.6)                   | 8(5.2)  | 153(100.0)  |
|           | ≥51                               | 25(27.5)           | 25(27.5)               | 10(11.0)                 | 31(34.1)  | 91(100.0)           | 60(65.2)           | 16(17.4)               | 8(8.7)                   | 8(8.7)  | 92(100.0)   |
|           | Total                             | 316(29.7)          | 304(28.6)              | 127(11.9)                | 316(29.7) | 1063(100.0)         | 646(58.5)          | 312(28.3)              | 90(8.2)                  | 56(5.1) | 1104(100.0) |
| Education | Junior high school and below      | 28(20.0)           | 29(20.7)               | 15(10.7)                 | 68(48.6)  | 140(100.0)          | 81(52.9)           | 41 (26.8)              | 19(12.4)                 | 12(7.8) | 153(100.0)  |
|           | High school / technical secondary | 102(25.1)          | 123(30.3)              | 46(11.3)                 | 135(33.3) | 406(100.0)          | 232(55.0)          | 134 (31.8)             | 35(8.3)                  | 21(5.0) | 422(100.0)  |
|           | junior college                    | 95(29.3)           | 99(30.6)               | 47(14.5)                 | 83(25.6)  | 324(100.0)          | 196(59.9)          | 97 (29.7)              | 20(6.1)                  | 14(4.3) | 327(100.0)  |
|           | undergraduate and above           | 91(47.2)           | 53(27.5)               | 19(9.8)                  | 30(15.5)  | 193(100.0)          | 137(67.8)          | 40 (19.8)              | 16(7.9)                  | 9(4.5)  | 202(100.0)  |
|           | Total                             | 316(29.7)          | 304(28.6)              | 127(11.9)                | 316(29.7) | 1063(100.0)         | 646(58.5)          | 312(28.3)              | 90(8.2)                  | 56(5.1) | 1104(100.0) |

| Variables          | Actual selection                  |                    |                        |                          |           | Expected selection  |                    |                        |                          |         |             |
|--------------------|-----------------------------------|--------------------|------------------------|--------------------------|-----------|---------------------|--------------------|------------------------|--------------------------|---------|-------------|
|                    | Municipal hospitals               | District hospitals | Street-level hospitals | Community Health Service | Total     | Municipal hospitals | District hospitals | Street-level hospitals | Community Health Service | Total   |             |
| Monthly income     | <3000                             | 37(32.7)           | 28(24.8)               | 9(8.0)                   | 39(34.5)  | 113(100.0)          | 74(60.2)           | 29 (23.6)              | 13(10.6)                 | 7(5.7)  | 123(100.0)  |
|                    | 3000~                             | 65(19.0)           | 74(21.6)               | 48(14.0)                 | 155(45.3) | 342(100.0)          | 194(52.3)          | 107(28.8)              | 50(13.5)                 | 20(5.4) | 371(100.0)  |
|                    | 5000~                             | 123(28.4)          | 158(36.5)              | 54(12.5)                 | 98(22.6)  | 433(100.0)          | 246(57.3)          | 149(34.7)              | 19(4.4)                  | 15(3.5) | 429(100.0)  |
|                    | 10000~                            | 54(44.3)           | 37(30.3)               | 12(9.8)                  | 19(15.6)  | 122(100.0)          | 88(72.7)           | 17(14.0)               | 7(5.8)                   | 9(7.4)  | 121(100.0)  |
|                    | ≥15000                            | 37(69.8)           | 7(13.2)                | 4(7.5)                   | 5(9.4)    | 53(100.0)           | 44(73.3)           | 10(16.7)               | 1(1.7)                   | 5(8.3)  | 60(100.0)   |
|                    | Total                             | 316(29.7)          | 304(28.6)              | 127(11.9)                | 316(29.7) | 1063(100.0)         | 646(58.5)          | 312(28.3)              | 90(8.2)                  | 56(5.1) | 1104(100.0) |
| Medical insurance  | Level 1                           | 179(36.2)          | 149(30.1)              | 51(10.3)                 | 116(23.4) | 495(100.0)          | 316(65.2)          | 129(26.6)              | 27(5.6)                  | 13(2.7) | 485(100.0)  |
|                    | Level 2                           | 55(21.1)           | 92(35.2)               | 40(15.3)                 | 74(28.4)  | 261(100.0)          | 136(50.9)          | 89(33.9)               | 24(9.0)                  | 18(8.3) | 267(100.0)  |
|                    | Level 3                           | 23(16.7)           | 44(31.9)               | 17(12.3)                 | 54(39.1)  | 138(100.0)          | 71(45.2)           | 51(32.5)               | 22(14.0)                 | 13(8.3) | 157(100.0)  |
|                    | uninsured                         | 59(34.9)           | 19(11.2)               | 19(11.2)                 | 72(42.6)  | 169(100.0)          | 123(63.1)          | 43(22.1)               | 17(8.7)                  | 12(6.2) | 195(100.0)  |
|                    | Total                             | 316(29.7)          | 304(28.6)              | 127(11.9)                | 316(29.7) | 1063(100.0)         | 646(58.5)          | 312(28.3)              | 90(8.2)                  | 56(5.1) | 1104(100.0) |
| Housing conditions | Self-purchased housing            | 110(39.6)          | 92(33.1)               | 25(9.0)                  | 51(18.3)  | 278(100.0)          | 168(62.7)          | 71(26.5)               | 15(5.6)                  | 14(5.2) | 268(100.0)  |
|                    | Renting policy housing            | 15(20.2)           | 36(48.0)               | 11(14.7)                 | 13(17.3)  | 75(100.0)           | 41(53.9)           | 22(28.9)               | 6(7.9)                   | 7(9.2)  | 76(100.0)   |
|                    | Renting housing in Urban Villages | 93(21.9)           | 114(26.8)              | 65(15.3)                 | 153(36.0) | 425(100.0)          | 222(49.8)          | 154(34.5)              | 50(11.2)                 | 20(4.5) | 446(100.0)  |
|                    | Renting commercial housing        | 56(39.2)           | 29(20.3)               | 8(5.6)                   | 50(35.0)  | 143(100.0)          | 103(70.5)          | 30(20.5)               | 8(5.5)                   | 5(3.4)  | 146(100.0)  |

| Variables       | Actual selection    |                    |                        |                          |             | Expected selection  |                    |                        |                          |             |             |
|-----------------|---------------------|--------------------|------------------------|--------------------------|-------------|---------------------|--------------------|------------------------|--------------------------|-------------|-------------|
|                 | Municipal hospitals | District hospitals | Street-level hospitals | Community Health Service | Total       | Municipal hospitals | District hospitals | Street-level hospitals | Community Health Service | Total       |             |
| Dormitory       | 13(23.2)            | 14(25.0)           | 4(7.1)                 | 25(44.6)                 | 56(100.0)   | 51(65.4)            | 17(21.8)           | 6(7.7)                 | 4(5.1)                   | 78(100.0)   |             |
| Others          | 29(33.7)            | 19(22.1)           | 14(16.3)               | 24(27.9)                 | 86(100.0)   | 61(67.8)            | 18(20.0)           | 5(5.6)                 | 6(6.7)                   | 90(100.0)   |             |
| Total           | 316(29.7)           | 304(28.6)          | 127(11.9)              | 316(29.7)                | 1063(100.0) | 646(58.5)           | 312(28.3)          | 90(8.2)                | 56(5.1)                  | 1104(100.0) |             |
| Marital status  | Single              | 86(33.5)           | 58(22.6)               | 35(13.6)                 | 78(30.4)    | 257(100.0)          | 192(64.6)          | 59(19.9)               | 31(10.4)                 | 15(5.1)     | 297(100.0)  |
|                 | Married             | 230(28.5)          | 246(30.5)              | 92(11.4)                 | 238(29.5)   | 806(100.0)          | 454(56.3)          | 253(31.4)              | 59(7.3)                  | 41(5.1)     | 807(100.0)  |
|                 | Total               | 316(29.7)          | 304(28.6)              | 127(11.9)                | 316(29.7)   | 1063(100.0)         | 646(58.5)          | 312(28.3)              | 90(8.2)                  | 56(5.1)     | 1104(100.0) |
| census register | Registered          | 138(34.7)          | 140(35.2)              | 34(8.5)                  | 86(21.6)    | 398(100.0)          | 254(65.3)          | 100(25.7)              | 21(5.4)                  | 14(3.6)     | 398(100.0)  |
|                 | Non-registered      | 178(26.8)          | 164(24.7)              | 93(14.0)                 | 230(34.6)   | 665(100.0)          | 392(54.8)          | 212(29.7)              | 69(9.7)                  | 42(5.9)     | 665(100.0)  |
|                 | Total               | 316(29.7)          | 304(28.6)              | 127(11.9)                | 316(29.7)   | 1063(100.0)         | 646(58.5)          | 312(28.3)              | 90(8.2)                  | 56(5.1)     | 1104(100.0) |

## 269 Demographic characteristics and preferred first medical institution

270 The demographic characteristics, including age, education, income, medical  
271 insurance, housing condition, marital status and census register, grouped by the  
272 selection of actual and expected preferred medical institutions were presented in  
273 **Table 2.**

### 274 Age

275 Significant differences were both observed in the level of actual ( $\chi^2=33.257$ ,  
276  $P=0.001$ ) and expected medical institutions ( $\chi^2=23.415$ ,  $P=0.024$ ) among different age  
277 groups. In terms of actual first medical institution, the largest proportion of choosing  
278 municipal medical institutions as their first choice were observed in the age group of  
279 21~30 and 41~50 years. The largest proportion of choosing community health service  
280 center were observed in the age group of  $\leq 20$  years, with the proportion of 68.8%. In  
281 terms of expected first medical institution, with age increase, subjects expect to  
282 choose higher level of medical institution. The proportion of choosing municipal  
283 hospital was the largest in each age group, ranging from 45.9% to 65.2%.

### 284 Education

285 Subjects with different educational backgrounds had different preferences for actual  
286 ( $\chi^2=67.169$ ,  $P<0.001$ ) and expected medical institutions ( $\chi^2=20.079$ ,  $P=0.017$ ). Those  
287 with high educational level are more inclined to choose high-level medical institutions  
288 for the first visit. Linear trends were observed between education levels and actual  
289 ( $\chi^2=54.189$ ,  $P<0.0001$ ). or expected medical institutions ( $\chi^2=20.079$ ,  $P=0.017$ ).

### 290 Income

291 Significant differences were both observed in the level of actual  
292 ( $\chi^2=127.362$ ,  $P<0.001$ ) and expected medical institutions ( $\chi^2=57.767$ ,  $P<0.001$ ) among  
293 subjects with different income level. Linear trends were observed between monthly  
294 income levels and actual ( $\chi^2 =62.024$ ,  $P<0.0001$ ). or expected medical institutions  
295 ( $\chi^2=5.569$ ,  $P=0.018$ ). Those with high monthly income levels are more inclined to  
296 choose high levels for the first visit medical institutions. In terms of expected medical  
297 institution, over 50% of the subjects in all monthly income groups would choose  
298 municipal hospital as their first medical institution, of which, the largest proportion  
299 were observed in the group of 10000-14999 yuan and over 15000 yuan, with the  
300 corresponding proportion of 72.7% and 73.3%.



1  
2  
3  
4 301 **Medical insurance**  
5

6  
7 302 Significant differences were both observed in the level of actual ( $\chi^2=69.656$ ,  $P<0.001$ )  
8 303 and expected medical institutions ( $\chi^2=39.734$ ,  $P<0.001$ ) among subjects with different  
9 304 medical insurance levels. Linear trends were observed between medical insurance  
10 305 levels and actual ( $\chi^2=26.885$ ,  $P<0.0001$ ) or expected medical institutions ( $\chi^2=10.450$ ,  
11 306  $P=0.001$ ). Subjects with lower level of medical insurance are more inclined to choose  
12 307 community health service center. In terms of expected medical institution, the  
13 308 proportion of choosing municipal hospital was the highest, ranging from 45.2% to  
14 309 65.2%

15  
16  
17  
18 310 **Housing conditions**  
19

20  
21 311 Subjects with different housing conditions had different preferences for actual  
22 312 ( $\chi^2=84.040$ ,  $P<0.001$ ) and expected medical institutions ( $\chi^2=38.790$ ,  $P=0.001$ ). In  
23 313 terms of actual medical institution, the proportions of subjects with self-purchased  
24 314 houses and rented commercial houses choosing municipal hospitals as their first  
25 315 medical institution, were the highest, with the corresponding proportions of 39.6%  
26 316 and 39.2%, respectively. The proportion of the subjects with renting policy housing  
27 317 who choose district-level hospitals was highest, reaching 48.0%. The proportion of  
28 318 the subjects living in dormitory who choose community health service center was  
29 319 highest, reaching 44.6%. In terms of expected medical institution, the proportion of  
30 320 choosing municipal hospital was the highest, in all groups with different housing  
31 321 conditions. Comparatively, the overall proportion of choosing community health  
32 322 service center was only 5.1%, ranging from 3.4% to 9.2% in all groups.

33  
34  
35  
36  
37  
38 323 **Marital status**  
39

40  
41 324 There is no statistically significant difference in the actual medical institution  
42 325 selection and marital status ( $\chi^2=6.738$ ,  $P=0.081$ ). The proportions of choosing  
43 326 municipal hospital and community health service center in single subjects were the  
44 327 highest, with the corresponding percentage of 33.5 and 30.4. However, significant  
45 328 difference was observed between marital status and expected medical institutions  
46 329 ( $\chi^2=15.348$ ,  $P=0.002$ ). The proportion of expecting municipal hospital was highest in  
47 330 both single and married subjects, with the corresponding percentage of 64.6 and 56.3,  
48 331 respectively. Only 5.1% of the subjects would choose community health service  
49 332 center.

50  
51  
52  
53 333 **Census register**  
54

55  
56  
57 334 Significant differences were both observed in the level of actual ( $\chi^2=35.141$ ,  
58 335  $P<0.001$ ) and expected medical institutions ( $\chi^2=14.263$ ,  $P=0.003$ ) among subjects  
59  
60

336 with different census register. In terms of actual medical institution, subjects with  
 337 Shenzhen census register were more inclined to choose municipal and district-level  
 338 hospitals, with the corresponding percentage of 34.7 and 35.2, respectively. Subjects  
 339 without Shenzhen census register were inclined to choose community health service  
 340 center, with the percentage of 34.6. Comparatively, subjects with and without  
 341 Shenzhen census register both expect municipal hospital, and district-level hospital  
 342 as the second choice.

### 343 **Medical technology and convenience are the main factors in choosing a medical** 344 **institution**

345 Major factors on the selection of medical institution were shown in **Table 3**. Over  
 346 70% of the subjects considered medical technology and convenience as the main  
 347 factors in choosing a medical institution. 14.04% and 12.68% of the subjects  
 348 considered service attitude and medical price, respectively, in choosing a medical  
 349 institution. Only 2.80% considered according to specific circumstances.

350 **Table 3 Major factors on the actual and expected selection of first medical**  
 351 **institution (n, %)**

| Major factors                           | Municipal hospital | District-level hospital | Street-level hospital | Community health service | Total       |
|-----------------------------------------|--------------------|-------------------------|-----------------------|--------------------------|-------------|
| Medical technology                      | 350 (73.5)         | 96 (20.2)               | 15 (3.2)              | 15 (3.2)                 | 476(100.0)  |
| Convenience                             | 127 (42.1)         | 126 (41.7)              | 30 (9.9)              | 19 (6.3)                 | 302(100.0)  |
| Attitude of service and medical ethnics | 93 (60.0)          | 29 (18.7)               | 24 (15.5)             | 9 (5.8)                  | 155(100.0)  |
| Price                                   | 57 (40.7)          | 55 (39.3)               | 20 (11.8)             | 8 (5.7)                  | 140(100.0)  |
| Others                                  | 19 (61.3)          | 6 (19.4)                | 1 (3.2)               | 5 (16.1)                 | 31(100.0)   |
| Total                                   | 646(58.5)          | 312(28.3)               | 90(8.2)               | 56(5.1)                  | 1104(100.0) |

### 352 **Understanding of the community first diagnosis system**

353 Subjects didn't have a high level of understanding of the community first diagnosis  
 354 system, as shown in **Table 4**. Only 3.67% of the subjects were very familiar with the  
 355 community first diagnosis system whereas 59.53% were less familiar or unfamiliar. In  
 356 subjects who were unfamiliar with the community first diagnosis system, only 18.7%  
 357 agree with this system while 71.70% hold an indifferent attitude. Subjects with better  
 358 understanding of the community first diagnosis system were more in favor of the  
 359 community first diagnosis system ( $\chi^2=177.805$ ,  $P<0.0001$ ). There is a linear trend  
 360 between the understanding and agreement on the community first diagnosis.  
 361 ( $\chi^2=145.327$ ,  $P<0.0001$ ).

362 **Table 4 Analysis of the understanding and agreement on the community first**  
 363 **diagnosis system(n, %)**

| Whether understanding community first | agree | disagree | Doesn't matter | Total |
|---------------------------------------|-------|----------|----------------|-------|
|---------------------------------------|-------|----------|----------------|-------|

|                     |            |           |            |             |
|---------------------|------------|-----------|------------|-------------|
| Very familiar       | 32 (58.2)  | 10 (18.2) | 13 (23.6)  | 55 (3.67)   |
| Quite familiar      | 99 (61.9)  | 16 (10.0) | 45 (28.1)  | 160 (10.67) |
| Moderately familiar | 221 (56.4) | 32 (8.2)  | 139 (35.5) | 392 (26.13) |
| Less familiar       | 210 (42.3) | 64 (12.9) | 223 (44.9) | 497 (33.13) |
| Unfamiliar          | 74 (18.7)  | 38 (9.6)  | 284 (71.7) | 396 (26.40) |

### 364 **Main factors affecting participants' preference of medical institution**

365 We established two logistic regression models to explore the factors on the selection  
 366 of medical institution. The dependent variables are different, which were the actual  
 367 and expected first medical institution in model 1 and 2, respectively. Dependent  
 368 variable is further classified in two categories, with street-level hospital, community  
 369 health service center and private hospital as "0", municipal and district-level hospitals  
 370 as "1". Independent variables and their definitions are the same, including age,  
 371 education, occupation, census register, marital status, monthly income, housing  
 372 conditions and medical insurance, which were selected from statistically significant  
 373 single factor analysis on the preferred first medical institution. Occupation and  
 374 housing conditions were dummified, with other occupation, other housing condition  
 375 as a reference. Other independent variables including  $\leq 20$  years, Shenzhen household  
 376 registration, unmarried as the reference. Monthly income, education and medical  
 377 insurance as ordered variables.

378 In model 1, education, household registration and monthly income affected subjects'  
 379 actual medical institution. There was a statistically significant difference of the  
 380 regression equation ( $\chi^2=11.95$ ,  $P = 0.001$ ), with  $-2\text{Log}=1357.646$  and correction  
 381 coefficient of determination  $r^2=0.505$ . Education, household registration and monthly  
 382 income can explain 65.5% of the reasons on the subjects' choice actual first medical  
 383 institution. Subjects with higher the education level, higher the monthly income level,  
 384 were more inclined to choose municipal or district-level hospitals. Compared with  
 385 Shenzhen household registration, non-Shenzhen household registration was more  
 386 inclined to choose street-level hospitals and community health service centers, as  
 387 shown in **Table 5**.

388 In model 2, occupation, medical insurance levels and household registration affected  
 389 subjects' expected medical institution. There was a statistically difference of the  
 390 logistic regression, with  $-2\text{Log}=830.499$  ( $\chi^2=15.130$ ,  $P = 0.034$ ). The prediction  
 391 accuracy rate is 86.8%. Subjects with higher medical insurance levels were more  
 392 inclined to choose city-level or district-level hospitals. Compared with Shenzhen  
 393 household registration, non-Shenzhen household registration was more inclined to  
 394 choose street hospitals and community health service centers, as shown in **Table 5**.

395 **Table 5 Logistics regression analysis of the factors affecting subjects' actual and**  
 396 **expected first medical institution.**

| Model                    | Variable                                        | <i>b</i> | <i>S<sub>b</sub></i> | Wald $\chi^2$ | <i>P</i> | <i>OR</i>    | <i>OR</i> 95% <i>CI</i> |
|--------------------------|-------------------------------------------------|----------|----------------------|---------------|----------|--------------|-------------------------|
| Actual Selection Model   | Constant                                        | -0.176   | 0.346                | 0.260         | 0.610    | 0.838        | -                       |
|                          | Education                                       | 0.258    | 0.075                | 11.838        | 0.001    | 1.295        | 1.118, 1.500            |
|                          | Census status                                   | -0.632   | 0.138                | 20.883        | 0.000    | 0.532        | 0.405, 0.697            |
|                          | Monthly income                                  | 0.343    | 0.073                | 21.747        | 0.000    | 1.409        | 1.220, 1.627            |
| Expected Selection Model | Constant                                        | 2.462    | 0.438                | 31.552        | 0.000    | 11.732       | -                       |
|                          | Occupation(Others as the reference)             | -        | -                    | 14.843        | 0.038    | -            | -                       |
|                          | public institutions                             | 1.151    | 0.453                | 6.441         | 0.011    | 3.160        | 1.299, 7.684            |
|                          | professional and technical personnel            | 0.222    | 0.335                | 0.442         | 0.506    | 1.249        | 0.648, 2.406            |
|                          | Enterprise managers                             | 0.793    | 0.402                | 3.899         | 0.048    | 2.211        | 1.006, 4.859            |
|                          | Enterprise staff                                | 0.710    | 0.365                | 3.792         | 0.052    | 2.035        | 0.995, 4.159            |
|                          | Individual industrial and commercial households | 0.995    | 0.384                | 6.721         | 0.010    | 2.705        | 1.275, 5.742            |
|                          | Worker                                          | 0.484    | 0.322                | 2.264         | 0.132    | 1.623        | 0.864, 3.050            |
|                          | Unemployed                                      | 0.007    | 0.465                | 0.000         | 0.988    | 1.007        | 0.405, 2.505            |
|                          | Census register                                 | -0.457   | 0.221                | 4.270         | .039     | 0.633        | 0.410, 0.977            |
| Medical insurance        | -0.161                                          | 0.082    | 3.846                | .050          | 0.851    | 0.725, 1.000 |                         |

## 397 Discussion

398 This study demonstrated the preference and associated factors of choosing a medical  
 399 institution for the first visit in Shenzhen citizens. Generally, over 50% of the subjects  
 400 were willing to select municipal and district-level medicals institutions for the first  
 401 visit. Those with high educational level, or high-income levels, or Shenzhen census  
 402 register, were more inclined to choose high-level medical institutions. Over 70% of  
 403 the subjects considered medical technology and convenience as the main factors in  
 404 choosing a medical institution.

### 405 Factors of health-seeking behavior

406 In theory, an individual's healthcare needs do not necessarily turn into effective  
 407 demand. The behavior of consuming medical service involves a series of  
 408 decision-making processes governed by many factors. In addition to whether the  
 409 residents themselves perceive the need for health services, it is also related to their  
 410 income level, social status, health security, transportation convenience, risk habits,  
 411 health awareness, as well as the type and quality of services provided by health  
 412 facilities.<sup>24</sup> The health-seeking behavior<sup>20-22</sup>, which was defined as the actions taken

1  
2  
3 413 by individuals who perceive they have an illness to obtain a suitable remedy<sup>23</sup>, only  
4 414 occurred if the individual indeed utilize the medical resources. Therefore, the  
5 415 expected medical institution for an individual's first consultation may be different  
6 416 from the actual selection. In the current study, we found that if feeling unwell, main  
7 417 factors on the subjects' preferred medical institution and their actual first visit were  
8 418 different. When conditions permit, occupation, types of medical insurance  
9 419 participation, and household registration are the main factors that affected subjects'  
10 420 expected medical service selection. In comparison, education, household registration  
11 421 and monthly income affected subjects' actual first medical service selection. The  
12 422 exploration of factors on expected and actual first medical institution may, to some  
13 423 extent, help us determine and figure out the differences between individual preference  
14 424 and attitude of the medical institution, and their actual healthcare-seeking behaviors,  
15 425 which is very crucial for strengthening the hierarchical diagnosis and treatment  
16 426 system, as it also concerns the effective allocation and rational use of medical  
17 427 resources.

18  
19  
20  
21  
22  
23  
24 428 There are many factors that can be associated with healthcare choices, including  
25 429 patient and family factors, provider factors, and environmental factors. In the current  
26 430 study, the finding that medical technology and convenience are the main factors in  
27 431 choosing a medical institution, is consistent with previous studies in which  
28 432 participants indicated to prioritise organizational factors.<sup>25</sup> A previous study also  
29 433 indicated that compared with the situation in the other regions in China, residents in  
30 434 Shenzhen can access general hospitals timelier, but inaccessibility to medical  
31 435 resources among communities existed in this first-tier Chinese city.<sup>11</sup> From the  
32 436 perspective of provider and environmental factors, the perception of provider  
33 437 responsiveness, considering factors such as convenience, waiting time, and  
34 438 confidence, is a strong motivating factor when choosing primary care according to a  
35 439 study among about 40 patients in England.<sup>26</sup> In addition, perceived professionally  
36 440 relevant factors<sup>27, 28</sup> and doctor's quantity also affected patients' choices.<sup>29</sup>  
37 441 Geographical factors were also associated with patients' healthcare decision-making  
38 442 and the use of healthcare services, and to some extent, can constrain individual's  
39 443 ability to make good healthcare choices, yet participants have differing capacities to  
40 444 mobilise resources to overcome the constraints of place.<sup>30</sup>

41  
42  
43  
44  
45  
46  
47 445 Sociodemographic characteristics such as insurance and income, had a considerable  
48 446 impact on their health care decisions. Geitona *et al.* found that the utilization of health  
49 447 services was mostly determined by health status rather than socioeconomic factors  
50 448 like medical insurance.<sup>31</sup> A study conducted in 14 tertiary hospitals in Shanghai,  
51 449 China, showed that patients' healthcare-seeking preferences were influenced mainly  
52 450 by illness severity and sociodemographic characteristics, and patients who earned  
53 451 higher monthly incomes expressed a preference for first-class providers.<sup>20</sup>

## 452 **Dilemma of first diagnosis at the community health service center**

453 Some of our findings may reflect initial effects of reform implementation. Under the  
454 current hierarchical diagnosis and treatment system, subjects in the current study were  
455 not very familiar with the first diagnosis system of community health service centers,  
456 most of whom even didn't know whether the community health service center has the  
457 ability of the first diagnosis and question about the service capacity. These  
458 phenomena will undoubtedly hinder the implementation of the hierarchical diagnosis  
459 and treatment system and it is also not conducive for residents to effectively cooperate  
460 with the implementation of the hierarchical diagnosis and treatment system.

461 In addition to the low level of awareness of the first diagnosis system, it should be  
462 noted that subjects' willingness on community health service centers was not strong.  
463 Only 21.1% of the subjects would choose community health center as their initial  
464 visit, inconsistent with a previous study conducted in Shenzhen in which the  
465 willingness on community health centers was high among patients with health  
466 insurance, who were female, and who were familiar with gatekeeper policy.<sup>32</sup>

467 The concepts most relevant to hierarchical diagnosis and treatment in the world are  
468 the "three-level health care service model" and the "gatekeeper" system, which  
469 basically include the "gatekeeper" system and two-way referral system centered on  
470 the first diagnosis at the grassroots level. It is not only a matter of seeing a doctor, but  
471 also a matter of institutional arrangement, which consists of division of labor among  
472 medical institutions, rational allocation of medical resources, maximization of use  
473 efficiency, and refinement of patient management services. Health department and  
474 health insurance department are mainly promoters of hierarchical treatment system.  
475 The implementation of the hierarchical treatment system is conducive to optimizing  
476 the allocation of medical and health resources and to reduce the cost of medical  
477 treatment, control of medical and health costs.

478 However, the first diagnosis in a primary health care facility is in a dilemma. From  
479 the aspect of patients, their subconscious trust in large hospitals of well-equipped and  
480 advanced instruments, doctor's with high skills. From the aspect of health provider,

481 weaknesses, such as the insufficient service capacity of primary health institutions, the  
482 ambiguous positioning of medical institutions, inability of information share, are quite  
483 obvious.<sup>27, 29, 33</sup> For instance, according to the statics of the 2016 Health and Family  
484 Planning Statistical Bulletin, 94.2% of the total primary medical and health  
485 institutions only provided 55.1% of the total number of diagnosis and treatment, while  
486 the first-, second- and third-level hospitals, which accounted for 3.0% of the total  
487 number of medical institutions, provided 41.2% of the total number of diagnosis and  
488 treatment.<sup>34</sup>

489 In terms of the mechanism of hierarchical diagnosis and treatment system, there is no  
490 incentive mechanism, which is mainly led by the health administrative department by  
491 adopting semi-mandatory measures to encourage patients to seek medical treatment in  
492 an orderly manner. This administrative hierarchical diagnosis and treatment system is  
493 in a passive state and has not formed an effective incentive mechanism.

1  
2  
3 494 In order to better promote hierarchical diagnosis and treatment, we should learn more  
4 495 from the successful foreign experience. One particular example is the United  
5 496 Kingdom, which is one of the earliest and strictest western countries that practice the  
6 497 hierarchical diagnosis and treatment system. After years of development and  
7 498 improvement, it has become a typical representative of the British welfare system.  
8 499 Although prominent problems such as rapid growth of medical expenses and low  
9 500 efficiency have become the challenges faced by the NHS,<sup>35, 36</sup> its successful  
10 501 experience and lessons have significant reference for deepening of China's medical  
11 502 reform.

12 503 To solve the dilemma of first diagnosis at the community health service, several  
13 504 approaches can be referred from other countries' successful experiences. First, in  
14 505 order to improve the ability of primary medical and health services, the management of  
15 506 the general practitioner system and personnel training should be strengthened.  
16 507 Successful experiences were available, such as, the Quality of Health Framework in  
17 508 UK,<sup>37</sup> Royal College of General Practitioners (RACGP) in Australia,<sup>38</sup> and  
18 509 Germany's implementation of accessing management and strict practice qualification  
19 510 review for physicians.<sup>39</sup> **Second**, as referring to the United States, the implementation  
20 511 of strict cost control and incentive measures can be adopted to clarify the diagnostic  
21 512 criteria of disease and specify the length of hospitalization through diagnosis-related  
22 513 classifications (DRGs).<sup>40</sup> Third, payment methods can be more diversified. For  
23 514 example, the option of paying per capita, as referring to Canada, can be added to  
24 515 encourage general practitioners to actively control medical expenses and attract more  
25 516 community residents to sign up for the first consultation.<sup>41</sup>

### 34 517 **Disease severity may affect patients' preference**

35  
36  
37 518 Although we reported that, if feeling unwell, main factors on the subjects' expected  
38 519 and actual first visit were different, we failed to further explore the influences of the  
39 520 diseases severity as well as comorbidities. When individuals are ill, decisions as to  
40 521 whether to seek medical treatment and which healthcare provider to choose are made  
41 522 by patients and their family members. These choices are influenced mainly by  
42 523 personal preference, disease severity, and economic capacity.<sup>20</sup> A previous study  
43 524 indicated that the distance is of less importance as illness is more severe.<sup>42</sup>  
44 525 Self-assessment of disease severity may also play a special and important role in the  
45 526 selection of first medical service. In addition, in case of perceived minor or severe  
46 527 illness, factors influencing choice of medical service on urban and rural respondents  
47 528 were different. In the case of perceived minor illness, no matter rural or urban  
48 529 residents, stated many factors which caused them not to access the system at the  
49 530 lower, primary level, among whom, indicated to choose it nevertheless because of the  
50 531 higher quality of care outweighing the higher cost of transportation, service and  
51 532 medication, as well as inconvenience of the complex physical environment.<sup>43</sup>

### 533 **Income and medical investment affect participants' selection**

534 Subjects with high educational level, high monthly income level, or favorable housing  
535 conditions, such as self-purchased or rented commercial houses, are more inclined to  
536 choose high-level medical institutions for the first visit. These findings are consistent  
537 with a previous systematic review which also revealed that higher income, higher  
538 education, and urbanization are associated with access at high levels.<sup>22</sup>

539 Income has long been considered as an important predictor of healthcare utilization  
540 and its impacts on individuals' health vary a lot. Generally, there is a positive  
541 correlation between income and healthcare use.<sup>24</sup> Wealthy individuals are less likely  
542 to underutilize healthcare resources; instead, they spend more money and time on  
543 healthcare, whilst individuals with low-income level face greater barriers to accessing  
544 adequate health care.<sup>44</sup> Retirees over the age of 60 or individuals without formal  
545 employment have more difficulty in accessing medical help, or even give up  
546 treatment due to lower incomes.<sup>33, 45</sup>

547 Investing in the health system not only saves lives, it is also a crucial investment in  
548 the wider economy. This is because ill-health impairs productivity, hinders job  
549 prospects and adversely affects human capital development. As an internationally  
550 accepted indicator, the total health expenditure is considered to be one of the effective  
551 ways to understand the health status of a country. According to the requirements of  
552 WHO, the total health expenditure in developing countries should not be less than 5%  
553 of the total GDP. In recent years, China's health investment has continued to increase,  
554 and the burden of the masses to see a doctor has gradually eased. Take the  
555 government capital investment in health services into account, it is vital important to  
556 further increase investment in medical and health services as well as pay more  
557 attention to population's health. Some countries in South East Asia spend very little  
558 on health, for example, India spends very little on health: \$215 in terms of purchasing  
559 power parity per person, which is lower than comparable middle-income  
560 countries such as China, Brazil and South Africa. This forces citizen to use their  
561 money to pay for the medical services, the use of out of pocket money causes panic to  
562 those who cannot manage to pay. There is a need for countries to extend the health  
563 funding by looking at a wider picture of investing in human capital.

564 Thus, from the observation of the current study, we strongly highly recommend cities,  
565 with rapid economic growth should speed up the investment in medical resources to  
566 solve the problems of the imbalance between economy and health. Take Shenzhen as  
567 an example, it's medical and health resources don't match the status and role of its  
568 first-tier cities, especially its economy volume. The investment in medical and health  
569 services in Shenzhen is far from enough. In the whole year of 2019, the investment of  
570 medical and health services in Shenzhen is 33.548 billion yuan, accounting for 7.37%  
571 of local fiscal expenditures. Although the investment in health is increasing year by  
572 year, the total health expenditure as a percentage of GDP in Shenzhen only accounted  
573 for 1.25, far below that of 5.20 in Guangdong and 6.43 in the whole nation. In  
574 addition, the per capita health service expenditure is 2496.35 yuan,<sup>46</sup> far below the  
575 national average of 4702.8 and Guangdong average of 4581.96.<sup>47</sup> By the end of 2019,



1  
2  
3 576 the number of certified (assistant) doctors per 1000 population in Shenzhen is 3.01,<sup>46</sup>  
4 577 far below the national and Guangdong Provincial city average of both 4.10.<sup>47</sup>  
5 578 Compared with the achievements in economic development, the insufficiency and  
6 579 distribution of medical and health services has become a "short board" that restricts  
7 580 the city's comprehensive development.

## 11 581 **Limitations**

12  
13  
14 582 Several limitations of this study need to be addressed. **First**, although the study  
15 583 sample was representative as a result of randomly sampling according to the  
16 584 proportion of population from all districts of Shenzhen, owing to the large floating  
17 585 population in Shenzhen, the interpretation and extrapolation of the characteristics of  
18 586 preference for the first medical service to the entire city population should be with  
19 587 great caution. **Second**, we did not further explore the diseases severity on the patients'  
20 588 preference of their initial visit. Self-assessment of disease severity may play a special  
21 589 and important role in the selection of first medical service. Convenience, such as the  
22 590 distance, is of less importance as illness is more severe.<sup>42</sup> **Third**, as the study focused  
23 591 on the participants of 18 and above, we could not collect information on the  
24 592 preference of the first medical service from children or their parents. Shenzhen is a  
25 593 city with young population age structure and due to the two-child policy recently  
26 594 imposed by the Chinese government, pediatrician shortage has become an  
27 595 increasingly important issues, parents' choice to a high-level medical institution may  
28 596 be affected due to the shortage of specialists.<sup>48</sup> Selection bias may exist as the study  
29 597 subjects were outpatient patients, we could not demonstrate and compare the  
30 598 preference and attitude of first medical service in inpatients and non-patients. **Last**  
31 599 **but not least**, although the subjects were randomly selected from 10 districts, we did  
32 600 not consider the effects of geographical characteristics on the residents' preference of  
33 601 first medical service. Shenzhen is a long and narrow city from east to west and a  
34 602 shorter city from north to south, the allocation and accessibility of medical resources  
35 603 may, to a certain extent, affect people's willingness and preference to medical service.

## 44 604 **Conclusion**

45  
46 605 In general, over 50% of the subjects are willing to select municipal and district-level  
47 606 medicals institutions for the first visit. Those with high educational level, or  
48 607 high-income levels, or Shenzhen census register, are more inclined to choose  
49 608 high-level medical institutions for first visit. Medical technology and convenience  
50 609 were considered as the main factors in choosing a medical institution.

## 54 610 **Acknowledgements**

55  
56  
57 611 We acknowledge the participance of each subject. We also would like to thank  
58 612 Professor Yang Zheng and Professor Huang Zhigang for their help and support in the

1  
2  
3 613 study design and data collection.  
4  
5

6 614 **Contributors**  
7

8  
9 615 DJ and XZ conceived and designed the study. XJ, LK, LX and HS conducted the field  
10 616 work. DJ and ZX conducted the field work and did the initial analyses of the data and  
11 617 wrote the manuscript. CH commented on the interpretation of the data. DJ, XJ and XJ  
12 618 revised and reviewed the manuscript. All authors have seen and approved the final  
13 619 version the abstract for publication.  
14  
15

16  
17 620 **Funding**  
18

19  
20 621 This study was partly supported by PhD Start-up Fund of Guangdong Medical  
21 622 University (No: B2019007), Guangdong Province Educational Science "Thirteenth  
22 623 Five-Year Plan" Project(No: 2019GXJK226) , Humanities and Social Sciences  
23 624 Planning Project of the Ministry of Education (No: 17YJAZH094) and Special  
24 625 project of Guangdong Provincial Department of Education(No: 2020KZDZX1106) .  
25  
26

27 626 **Competing interest statement :**  
28

29 627 No competing interests.  
30

31 628 **Data sharing:**

32 629 No additional data available.  
33  
34

35 630 **References**  
36  
37

- 38 631 1. Liu GG, Vortherms SA, Hong X. China's Health Reform Update. *Annu Rev Public*  
39 632 *Health*. 2017;38:431-48.  
40 633 2. Chinese State Council. Guiding Opinions of the General Office of the State Council  
41 634 on Promoting the Construction of a Hierarchical Diagnosis and Treatment  
42 635 System[EB/OL]. (2015-10-20)[2022-1-11].  
43 636 [http://www.gov.cn/zhengce/content/2015-10/20/content\\_10250.htm](http://www.gov.cn/zhengce/content/2015-10/20/content_10250.htm).  
44 637 3. Wang X, Yang H, Duan Z, et al. Spatial accessibility of primary health care in  
45 638 China: A case study in Sichuan Province. *Soc Sci Med*. 2018;209:14-24.  
46 639 4. Wang HH, Wang JJ, Wong SY, et al. The development of urban community health  
47 640 centres for strengthening primary care in China: a systematic literature review. *Br*  
48 641 *Med Bull*. 2015;116:139-53.  
49 642 5. Yang J, Siri JG, Remais JV, et al. The Tsinghua-Lancet Commission on Healthy  
50 643 Cities in China: unlocking the power of cities for a healthy China. *Lancet*.  
51 644 2018;391(10135):2140-84.  
52 645 6. Xiao Y, Chen X, Li Q, et al. Towards healthy China 2030: Modeling health care  
53 646 accessibility with patient referral. *Soc Sci Med*. 2021;276:113834.  
54 647 7. Alvarez-Rosete A, Mays N. Understanding NHS Policy Making in England: The  
55  
56  
57  
58  
59  
60

- 1  
2  
3 648 Formulation of the NHS Plan, 2000. *The British Journal of Politics and International*  
4 649 *Relations*. 2014;16(4):624-44.
- 5 650 8. Wu Q, Xie X, Liu W, et al. Implementation efficiency of the hierarchical diagnosis  
6 651 and treatment system in China: A case study of primary medical and health  
7 652 institutions in Fujian province. *Int J Health Plann Manage*. 2021;37(1)214-27.
- 8 653 9. Forrest CB. Primary care in the United States: primary care gatekeeping and  
9 654 referrals: effective filter or failed experiment? *BMJ*. 2003;326(7391):692-5.
- 10 655 10. Qiao L, Li Y, Liu Y, et al. The spatio-temporal change of China's net floating  
11 656 population at county scale from 2000 to 2010. *Asia Pacific Viewpoint*.  
12 657 2016;57(3):365-78.
- 13 658 11. Zhu L, Zhong S, Tu W, et al. Assessing Spatial Accessibility to Medical  
14 659 Resources at the Community Level in Shenzhen, China. *International journal of*  
15 660 *environmental research and public health*. 2019;16(2):242.
- 16 661 12. Yip W, Hsiao W. Harnessing the privatisation of China's fragmented health-care  
17 662 delivery. *Lancet*. 2014;384(9945):805-18.
- 18 663 13. Wu D, Lam TP. Underuse of Primary Care in China: The Scale, Causes, and  
19 664 Solutions. *J Am Board Fam Med*. 2016;29(2):240-7.
- 20 665 14 Li X, Lu J, Hu S, et al. The primary health-care system in China. *Lancet*.  
21 666 2017;390(10112):2584-94.
- 22 667 15. National Health Commission. *China Health Statistics Yearbook 2019*. Beijing:  
23 668 Peking Union Medical College Press; 2019.
- 24 669 16. Li X, Krumholz HM, Yip W, et al. Quality of primary health care in China:  
25 670 challenges and recommendations. *Lancet*. 2020;395(10239):1802-12.
- 26 671 17. Yip W, Fu H, Chen AT, et al. 10 years of health-care reform in China: progress  
27 672 and gaps in Universal Health Coverage. *Lancet*. 2019;394(10204):1192-204.
- 28 673 18. Yuan X. *Study on Resource Allocation of Community Health Service Centres in*  
29 674 *Shenzhen*; Shenzhen University; 2017.
- 30 675 19. Shenzhen Statistics Bureau, Survey Office of the National Bureau of Statistics in  
31 676 Shenzhen. *Shenzhen Statistical Year Book 2017*. Beijing: China Statistics Press;  
32 677 2017.
- 33 678 20. Yu W, Li M, Ye F, et al. Patient preference and choice of healthcare providers in  
34 679 Shanghai, China: a cross-sectional study. *BMJ Open*. 2017;7(10):e016418.
- 35 680 21. Jia E, Gu Y, Peng Y, et al. Preferences of Patients with Non-Communicable  
36 681 Diseases for Primary Healthcare Facilities: A Discrete Choice Experiment in Wuhan,  
37 682 China. *International journal of environmental research and public health*.  
38 683 2020;17(11):3987.
- 39 684 22. Liu Y, Kong Q, Yuan S, et al. Factors influencing choice of health system access  
40 685 level in China: A systematic review. *PLoS One*. 2018;13(8):e0201887.
- 41 686 23. Kasl SV, Cobb S. Health behavior, illness behavior, and sick-role behavior. II.  
42 687 Sick-role behavior. *Arch Environ Health*. 1966;12(4):531-41.
- 43 688 24. Zeng Y, Wan Y, Yuan Z, et al. Healthcare-Seeking Behavior among Chinese  
44 689 Older Adults: Patterns and Predictive Factors. *International journal of environmental*  
45 690 *research and public health*. 2021;18(6):2969.
- 46 691 25. Wu D, Lam TP, Lam KF, et al. Health reforms in china: the public's choices for  
47  
48  
49  
50  
51  
52  
53  
54  
55  
56  
57  
58  
59  
60

- 1  
2  
3 692 first-contact care in urban areas. *Fam Pract*. 2017;34(2):194-200.
- 4 693 26. Sturgeon D. Convenience, quality and choice: Patient and service-provider  
5 694 perspectives for treating primary care complaints in urgent care settings. *Int Emerg*  
6 695 *Nurs*. 2017;35:43-50.
- 7 696 27. Santos R, Gravelle H, Propper C. Does Quality Affect Patients' Choice of  
8 697 Doctor? Evidence from England. *Econ J (London)*. 2017;127(600):445-94.
- 9 698 28. Fanjiang G, von Glahn T, Chang H, et al. Providing patients web-based data to  
10 699 inform physician choice: if you build it, will they come? *J Gen Intern Med*.  
11 700 2007;22(10):1463-6.
- 12 701 29. Shengtian H, Linghua Z, Yonghe G. Analysis and Implications of the Factors  
13 702 Influencing Beijing Residents' Choice of Medical Services. *Chinese Medical Journal*.  
14 703 2017;34(4):350-2.
- 15 704 30. Lewis S, Willis K, Collyer F. Navigating and making choices about healthcare:  
16 705 The role of place. *Health Place*. 2018;52:215-20.
- 17 706 31. Geitona M, Zavras D, Kyriopoulos J. Determinants of healthcare utilization in  
18 707 Greece: implications for decision-making. *Eur J Gen Pract*. 2007;13(3):144-50.
- 19 708 32. Gan Y, Li W, Cao S, et al. Patients' Willingness on Community Health Centers as  
20 709 Gatekeepers and Associated Factors in Shenzhen, China: A Cross-sectional Study.  
21 710 *Medicine*. 2016;95(14):e3261.
- 22 711 33. Pitkanen V, Linnosmaa I. Choice, quality and patients' experience: evidence from  
23 712 a Finnish physiotherapy service. *Int J Health Econ Manag*. 2021;21(2):229-45.
- 24 713 34. National Health and Family Planning Commission of China. Statistical bulletin  
25 714 on the development of China's health and family planning in 2016[EB/OL].  
26 715 (2017-08-18)[2022-1-11].  
27 716 [http://www.nhc.gov.cn/guihuaxxs/s10748/201708/d82fa7141696407abb4ef764f3edf0](http://www.nhc.gov.cn/guihuaxxs/s10748/201708/d82fa7141696407abb4ef764f3edf095.shtml)  
28 717 95.shtml.
- 29 718 35. Ding C. Comparative analysis of medical insurance models in Germany and  
30 719 Britain: Bismarck model and Beveridge model *Collected Essays on Finance and*  
31 720 *Economics*. 2009(1):6:22-7.
- 32 721 36. Hu L. Reform and Enlightenment of British National Medical Service System  
33 722 *Health Economics Research*. 2011(3):3.
- 34 723 37. By R, Comptroller THE. *NHS Pay Modernisation : New Contracts for General*  
35 724 *Practice Services in England*. 2008.
- 36 725 38. You C, Wang F, Zhu Y, et al. Summary of Performance Evaluation on Primary  
37 726 Health Care and General Practice in Australia. *Chinese Primary Health Care*.  
38 727 2011;25(2):14-6.
- 39 728 39. Zhang Y, Huang R, Jiang P, et al. Teaching Model and Evaluation System of  
40 729 General Practice Training in Germany and Its Enlightenment to China. *Chinese*  
41 730 *General Practice*. 2019;022(034):4179-84.
- 42 731 40. Palmer G, Reid B. Evaluation of the performance of diagnosis-related groups and  
43 732 similar casemix systems: methodological issues. *Health Services Management*  
44 733 *Research*. 2001;14(2):71-81.
- 45 734 41. Tian J, Ji X.. What Can We Learn From Canadian Experience of General  
46 735 Practitioner System? *Chinese General Practice*. 2013;16(26):3031-3.

- 1  
2  
3 736 42. Qian D, Pong RW, Yin A, et al. Determinants of health care demand in poor, rural  
4 737 China: the case of Gansu Province. *Health Policy Plan.* 2009;24(5):324-34.  
5  
6 738 43. Liu Y, Zhong L, Yuan S, et al. Why patients prefer high-level healthcare facilities:  
7 739 a qualitative study using focus groups in rural and urban China. *BMJ Glob Health.*  
8 740 2018;3(5):e000854.  
9  
10 741 44. Wang Z, Li X, Chen M, et al. Social health insurance, healthcare utilization, and  
11 742 costs in middle-aged and elderly community-dwelling adults in China. *Int J Equity*  
12 743 *Health.* 2018;17(1):17.  
13  
14 744 45. Meyer SB, Luong TC, Mamerow L, et al. Inequities in access to healthcare:  
15 745 analysis of national survey data across six Asia-Pacific countries. *Bmc Health*  
16 746 *Services Research.* 2013;13(1):238.  
17  
18 747 46. Shenzhen Statistics Bureau, Survey Office of the National Bureau of Statistics in  
19 748 Shenzhen. *Shenzhen Statistical Year Book 2020.* Beijing: China Statistics Press;  
20 749 2020.  
21  
22 750 47. National Health Commission. *China Health Statistics Yearbook 2020.* Beijing:  
23 751 Peking Union Medical College Press; 2020.  
24  
25 752 48. Hu KJ, Sun ZZ, Rui YJ, et al. Shortage of paediatricians in China. *Lancet.*  
26 753 2014;383(9921):954.  
27  
28  
29  
30  
31  
32  
33  
34  
35  
36  
37  
38  
39  
40  
41  
42  
43  
44  
45  
46  
47  
48  
49  
50  
51  
52  
53  
54  
55  
56  
57  
58  
59  
60

## Questionnaire on medical treatment intention and medical treatment behavior of Shenzhen residents

Dear Citizen:

Providing high-quality medical public services is an important function of the government. In order to understand citizens' perceptions, attitudes and suggestions on medical services in Shenzhen, and to provide reference for deepening the reform of medical services, we conducted this survey. The survey adopts anonymous survey, the survey is purely for research purposes, please fill in carefully and truthfully. Thank you very much for your cooperation! Please tick "√" in the corresponding option.

Research Group of Shenzhen Academy of Social Sciences

October 2017

1. Gender: ①Male ②Female
2. Age: \_\_\_years
3. Education level: ①junior high school and below ②high school/secondary school ③college ④undergraduate ⑤graduate
4. Occupation (including pre-retirement occupation): ①Company manager ②Company employee ③Worker and service personnel ④Self-employed ⑤ Staff of government agencies and institutions ⑥ Unemployed ⑦ Others
5. Household registration: ① Shenzhen household registration ② Non-Shenzhen household registration
6. District you live in: ①Futian ②Luohu ③Nanshan ④Yantian ⑤Baoan ⑥Longgang ⑦ Longhua ⑧Pingshan ⑨Guangming New District ⑩Dapeng New District
7. Marital status (please skip 8 if you select "Unmarried"): ①Unmarried ②Married ③Divorced ④Widowed
8. Childbearing status: ①Never give birth ②Have given birth
9. Monthly income level: ①Below 3000 yuan ②3000~4999 yuan ③5000~9999 yuan ④10000~14999 yuan ⑤15000~29999 yuan ⑥30000 yuan and above
10. Housing status: ① self-purchased housing ② rented policy housing ③ rented private houses in urban villages ④ rented commercial houses ⑤ lived in company dormitories ⑥ others
11. What type of medical insurance do you participate in in Shenzhen?
  - ①Grade 1 (pay monthly fees based on 8% of my total monthly salary, more than 500 yuan per month in 2016, of which individuals need to pay about 100 yuan per month, which will be withheld and paid by the employer)
  - ②Grade 2 (paid monthly at 0.7% of the average monthly salary of on-the-job employees in the city in the previous year, of which the individual pays about 13.5 yuan per month)
  - ③The third gear (paid monthly at 0.5% of the average monthly salary of the on-the-job employees in the city in the previous year, of which the individual pays about 7 yuan per month, which is deducted from the salary)
  - ④ uninsured

1  
2  
3  
4  
5  
6  
7  
8  
9  
10  
11  
12  
13  
14  
15  
16  
17  
18  
19  
20  
21  
22  
23  
24  
25  
26  
27  
28  
29  
30  
31  
32  
33  
34  
35  
36  
37  
38  
39  
40  
41  
42  
43  
44  
45  
46  
47  
48  
49  
50  
51  
52  
53  
54  
55  
56  
57  
58  
59  
60

12. If you are unwell, what type of medical institution do you and your family prefer to see a doctor?

① City-level large hospitals ② District-level hospitals ③ Street hospitals ④ Private medical institutions ⑤ Community health service centers ⑥ Other hospitals ⑦ Depending on the situation

13. If conditions permit, what type of medical institution would you like to choose for the first consultation?

① Municipal hospitals ② District hospitals ③ Street hospitals ④ Private medical institutions ⑤ Community health service centers ⑥ Other hospitals ⑦ Depending on the situation

14. In general, what is the most important factor you consider when choosing a medical institution?

① Medical technology ② Convenience of medical treatment ③ Service attitude and medical ethics ④ Medical price ⑤ Others

15. Do you know about the first consultation system in the community (that is, when there is a need for medical treatment [non-emergency], you need to go to the community health service center first)?

① I know very well ② I understand a little bit ③ I understand a little bit ④ I heard about it, but I don't know much about it ⑤ I don't understand at all

16. Do you agree with the community first diagnosis system? ① Agree ② Disagree ③ It doesn't matter

17. In the past year, the number of times you went to the city or district hospital for diagnosis and treatment was:

① 0 times ② 1 time ③ 2 times ④ 3 times ⑤ 4 times ⑥ 5 times ⑦ 6 times or more

18. In the past year, the number of visits to the Community Health Service Center was:

① 0 times ② 1 time ③ 2 times ④ 3 times ⑤ 4 times ⑥ 5 times ⑦ 6 times or more

19. What community health services have you used? (Multiple choice)

① Vaccination ② Medical service ③ Check-up service ④ Rehabilitation service ⑤ Health education service ⑥ Family planning service ⑦ Other service ⑧ Never received

20. Do you think the community health service center has the ability and conditions for the first consultation? ① Yes ② No ③ Not sure

twenty one. Do you think that the phenomenon of "big hospitals clustered together and grassroots medical institutions deserted" is common in Shenzhen?

① Common ② Relatively common ③ Average ④ Not common ⑤ Not common

twenty two. What do you think is the main reason for the phenomenon of "big hospitals get together and grassroots medical institutions are deserted"? (Multiple choices are allowed, but no more than 3 choices)

① The scope of diagnosis and treatment in hospitals of different levels overlaps, and there is no dislocation development ② The level of primary medical care cannot meet the needs

③ The primary medical equipment cannot meet the demand ④ The service attitude of the primary medical institution is not good ⑤ The price of the primary medical service has no advantage

twenty three. How satisfied are you with Shenzhen's medical public services?

① Very satisfied ② Slightly satisfied ③ Normal ④ Not satisfied ⑤ Dissatisfied ⑥ Not sure

24. How satisfied are you with the medical services provided by Shenzhen Community Health Service Center?

① Very satisfied ② Slightly satisfied ③ Normal ④ Not satisfied ⑤ Dissatisfied ⑥ Not sure

25. How satisfied are you with the medical services in Shenzhen district and sub-district hospitals?

① Very satisfied ② Slightly satisfied ③ Normal ④ Not satisfied ⑤ Dissatisfied ⑥ Not sure

26. How satisfied are you with the medical services in Shenzhen-level hospitals?

1  
2  
3 ①Very satisfied ②Slightly satisfied ③Normal ④Not satisfied ⑤Dissatisfied ⑥Not sure

4 27. What do you think are the main problems of public medical services in Shenzhen at present?  
5 (Multiple choices are allowed, but no more than 3 choices)

6 ①The problem of medical technology level ②The problem of uneven distribution of high-quality  
7 medical resources ③The problem of service attitude and medical ethics

8 ④The problem of expensive medical treatment ⑤The problem of difficult medical treatment ⑥  
9 Other problems

10  
11 28. What do you think are the main problems of the Shenzhen Community Health Service Center at  
12 present? (Multiple choices are allowed, but no more than 3 choices)

13 ①The level of medical technology ②The problem of service attitude and medical ethics ③It is  
14 difficult to register and seek medical treatment

15 ④The cost of seeing a doctor is high and it is difficult to bear ⑤Other problems (please specify)

16 29. What do you think are the main problems existing in Shenzhen's district-level hospitals and sub-  
17 district hospitals? (Multiple choices are allowed, but no more than 3 choices)

18 ①The level of medical technology ②The problem of service attitude and medical ethics ③It is  
19 difficult to register and seek medical treatment

20 ④The cost of seeing a doctor is high and it is difficult to bear ⑤Other problems (please specify)

21 30. What do you think are the main problems existing in Shenzhen-level large-scale general  
22 hospitals? (Multiple choices are allowed, but no more than 3 choices)

23 ①The regional distribution is uneven, and it is inconvenient to seek medical treatment in the original  
24 area outside the customs. ②It is difficult to register and seek medical treatment. ③The cost of  
25 medical treatment is high and difficult to bear.

26 ④The level of medical technology still needs to be improved ⑤Service attitude and medical ethics  
27 ⑥Other questions (please specify)

28 31. What areas do you expect the government to focus on to improve medical services in Shenzhen?  
29 (Please select the option you think is important, you can select more than one)

30 ①Strengthen the construction of community health service centers and train high-level general  
31 practitioners to serve community residents ②Optimize the regional distribution of large and high-  
32 level medical institutions

33 ③Improve the medical level of large hospitals ④Strengthen the construction of medical ethics and  
34 medical style ⑤Increase government investment in medical and health care

35 ⑥Deepening the reform of the medical and health system ⑦Others (please specify)

36 32. How do you think tiered diagnosis and treatment should be improved? (Multiple choices are  
37 allowed, select the option you think is important)

38 ①Strengthen the medical level of primary medical institutions ②Strengthen the medical facilities  
39 and drug allocation of social health centers

40 ③Improve the service attitude and medical ethics of primary medical institutions ④Implement the  
41 contract system of community general practitioners and family doctors ⑤ Mandatory  
42 implementation of the first consultation system in the community

43 ⑥ Community health service centers and other primary medical care are responsible for general  
44 diagnosis and treatment, while large hospitals are responsible for the diagnosis and treatment of  
45 specialists and difficult diseases, implementing differentiated development

46  
47  
48  
49  
50  
51  
52  
53  
54  
55  
56  
57  
58  
59  
60  

---

**Thank you again for your participation!**



1  
2  
3  
4  
5  
6  
7  
8  
9  
10  
11  
12  
13  
14  
15  
16  
17  
18  
19  
20  
21  
22  
23  
24  
25  
26  
27  
28  
29  
30  
31  
32  
33  
34  
35  
36  
37  
38  
39  
40  
41  
42  
43  
44  
45  
46  
47  
48  
49  
50  
51  
52  
53  
54  
55  
56  
57  
58  
59  
60STROBE Statement—Checklist of items that should be included in reports of *cross-sectional studies*

|                              | Item No | Recommendation                                                                                                                                                                                    | Page number |
|------------------------------|---------|---------------------------------------------------------------------------------------------------------------------------------------------------------------------------------------------------|-------------|
| <b>Title and abstract</b>    | 1       | (a) Indicate the study's design with a commonly used term in the title or the abstract                                                                                                            | 1, 2, 3     |
|                              |         | (b) Provide in the abstract an informative and balanced summary of what was done and what was found                                                                                               | 2, 3        |
| <b>Introduction</b>          |         |                                                                                                                                                                                                   |             |
| Background/rationale         | 2       | Explain the scientific background and rationale for the investigation being reported                                                                                                              | 4, 5        |
| Objectives                   | 3       | State specific objectives, including any prespecified hypotheses                                                                                                                                  | 6           |
| <b>Methods</b>               |         |                                                                                                                                                                                                   |             |
| Study design                 | 4       | Present key elements of study design early in the paper                                                                                                                                           | 6           |
| Setting                      | 5       | Describe the setting, locations, and relevant dates, including periods of recruitment, exposure, follow-up, and data collection                                                                   | 6           |
| Participants                 | 6       | (a) Give the eligibility criteria, and the sources and methods of selection of participants                                                                                                       | 6           |
| Variables                    | 7       | Clearly define all outcomes, exposures, predictors, potential confounders, and effect modifiers. Give diagnostic criteria, if applicable                                                          | N/A         |
| Data sources/<br>measurement | 8*      | For each variable of interest, give sources of data and details of methods of assessment (measurement). Describe comparability of assessment methods if there is more than one group              | 6, 7        |
| Bias                         | 9       | Describe any efforts to address potential sources of bias                                                                                                                                         | 6           |
| Study size                   | 10      | Explain how the study size was arrived at                                                                                                                                                         | 6           |
| Quantitative variables       | 11      | Explain how quantitative variables were handled in the analyses. If applicable, describe which groupings were chosen and why                                                                      | 7           |
| Statistical methods          | 12      | (a) Describe all statistical methods, including those used to control for confounding                                                                                                             | 7           |
|                              |         | (b) Describe any methods used to examine subgroups and interactions                                                                                                                               | 7           |
|                              |         | (c) Explain how missing data were addressed                                                                                                                                                       | 7           |
|                              |         | (d) If applicable, describe analytical methods taking account of sampling strategy                                                                                                                | 6           |
|                              |         | (e) Describe any sensitivity analyses                                                                                                                                                             | N/A         |
| <b>Results</b>               |         |                                                                                                                                                                                                   |             |
| Participants                 | 13*     | (a) Report numbers of individuals at each stage of study—eg numbers potentially eligible, examined for eligibility, confirmed eligible, included in the study, completing follow-up, and analysed | N/A         |
|                              |         | (b) Give reasons for non-participation at each stage                                                                                                                                              | N/A         |
|                              |         | (c) Consider use of a flow diagram                                                                                                                                                                | N/A         |
| Descriptive data             | 14*     | (a) Give characteristics of study participants (eg                                                                                                                                                | 8           |

|                          |     |                                                                                                                                                                                                              |            |
|--------------------------|-----|--------------------------------------------------------------------------------------------------------------------------------------------------------------------------------------------------------------|------------|
|                          |     | demographic, clinical, social) and information on exposures and potential confounders                                                                                                                        |            |
|                          |     | (b) Indicate number of participants with missing data for each variable of interest                                                                                                                          | N/A        |
| Outcome data             | 15* | Report numbers of outcome events or summary measures                                                                                                                                                         | 8, 9       |
| Main results             | 16  | (a) Give unadjusted estimates and, if applicable, confounder-adjusted estimates and their precision (eg, 95% confidence interval). Make clear which confounders were adjusted for and why they were included | 23, 24, 25 |
|                          |     | (b) Report category boundaries when continuous variables were categorized                                                                                                                                    | 8, 9       |
|                          |     | (c) If relevant, consider translating estimates of relative risk into absolute risk for a meaningful time period                                                                                             | N/A        |
| Other analyses           | 17  | Report other analyses done—eg analyses of subgroups and interactions, and sensitivity analyses                                                                                                               | 9-23       |
| <b>Discussion</b>        |     |                                                                                                                                                                                                              |            |
| Key results              | 18  | Summarise key results with reference to study objectives                                                                                                                                                     | 25         |
| Limitations              | 19  | Discuss limitations of the study, taking into account sources of potential bias or imprecision. Discuss both direction and magnitude of any potential bias                                                   | 30, 31     |
| Interpretation           | 20  | Give a cautious overall interpretation of results considering objectives, limitations, multiplicity of analyses, results from similar studies, and other relevant evidence                                   | 25-30      |
| Generalisability         | 21  | Discuss the generalisability (external validity) of the study results                                                                                                                                        | 31         |
| <b>Other information</b> |     |                                                                                                                                                                                                              |            |
| Funding                  | 22  | Give the source of funding and the role of the funders for the present study and, if applicable, for the original study on which the present article is based                                                | 32         |

\*Give information separately for exposed and unexposed groups.

**Note:** An Explanation and Elaboration article discusses each checklist item and gives methodological background and published examples of transparent reporting. The STROBE checklist is best used in conjunction with this article (freely available on the Web sites of PLoS Medicine at <http://www.plosmedicine.org/>, Annals of Internal Medicine at <http://www.annals.org/>, and Epidemiology at <http://www.epidem.com/>). Information on the STROBE Initiative is available at [www.strobe-statement.org](http://www.strobe-statement.org).

# BMJ Open

## Patient preferences and attitudes towards first choice medical services in Shenzhen, China: a cross-sectional study

|                                 |                                                                                                                                                                                                                                                                                                                                                                                                                                                                                                                                                                                                                                                                                                                                                                                                                                         |
|---------------------------------|-----------------------------------------------------------------------------------------------------------------------------------------------------------------------------------------------------------------------------------------------------------------------------------------------------------------------------------------------------------------------------------------------------------------------------------------------------------------------------------------------------------------------------------------------------------------------------------------------------------------------------------------------------------------------------------------------------------------------------------------------------------------------------------------------------------------------------------------|
| Journal:                        | <i>BMJ Open</i>                                                                                                                                                                                                                                                                                                                                                                                                                                                                                                                                                                                                                                                                                                                                                                                                                         |
| Manuscript ID                   | bmjopen-2021-057280.R2                                                                                                                                                                                                                                                                                                                                                                                                                                                                                                                                                                                                                                                                                                                                                                                                                  |
| Article Type:                   | Original research                                                                                                                                                                                                                                                                                                                                                                                                                                                                                                                                                                                                                                                                                                                                                                                                                       |
| Date Submitted by the Author:   | 28-Mar-2022                                                                                                                                                                                                                                                                                                                                                                                                                                                                                                                                                                                                                                                                                                                                                                                                                             |
| Complete List of Authors:       | <p>Zhao, Xinyu; Guangdong Medical University School of Public Health, Epidemiology and Statistics<br/>         Xiao, Junhui; Guangdong Medical University<br/>         Chen, Huida; Guangdong Medical University, Department of Epidemiology and Statistics<br/>         Lin, Kena; Guangdong Medical University, Department of Epidemiology and Statistics<br/>         Li, Xiaoman; Guangdong Medical University, Department of Epidemiology and Statistics<br/>         Zeng, Zhiwen; Guangdong Medical University, Department of Epidemiology and Statistics<br/>         Huang, Shuyun; Guangdong Medical University, Department of Epidemiology and Statistics<br/>         Xie, Zhikui; Shenzhen Academy of Social Sciences<br/>         Du, Jinlin; Guangdong Medical University, Department of Epidemiology and Statistics</p> |
| <b>Primary Subject Heading</b>: | Public health                                                                                                                                                                                                                                                                                                                                                                                                                                                                                                                                                                                                                                                                                                                                                                                                                           |
| Secondary Subject Heading:      | Health policy, Public health, Epidemiology                                                                                                                                                                                                                                                                                                                                                                                                                                                                                                                                                                                                                                                                                                                                                                                              |
| Keywords:                       | EPIDEMIOLOGY, Health policy < HEALTH SERVICES ADMINISTRATION & MANAGEMENT, PUBLIC HEALTH                                                                                                                                                                                                                                                                                                                                                                                                                                                                                                                                                                                                                                                                                                                                                |
|                                 |                                                                                                                                                                                                                                                                                                                                                                                                                                                                                                                                                                                                                                                                                                                                                                                                                                         |

SCHOLARONE™  
Manuscripts



I, the Submitting Author has the right to grant and does grant on behalf of all authors of the Work (as defined in the below author licence), an exclusive licence and/or a non-exclusive licence for contributions from authors who are: i) UK Crown employees; ii) where BMJ has agreed a CC-BY licence shall apply, and/or iii) in accordance with the terms applicable for US Federal Government officers or employees acting as part of their official duties; on a worldwide, perpetual, irrevocable, royalty-free basis to BMJ Publishing Group Ltd ("BMJ") its licensees and where the relevant Journal is co-owned by BMJ to the co-owners of the Journal, to publish the Work in this journal and any other BMJ products and to exploit all rights, as set out in our [licence](#).

The Submitting Author accepts and understands that any supply made under these terms is made by BMJ to the Submitting Author unless you are acting as an employee on behalf of your employer or a postgraduate student of an affiliated institution which is paying any applicable article publishing charge ("APC") for Open Access articles. Where the Submitting Author wishes to make the Work available on an Open Access basis (and intends to pay the relevant APC), the terms of reuse of such Open Access shall be governed by a Creative Commons licence – details of these licences and which [Creative Commons](#) licence will apply to this Work are set out in our licence referred to above.

Other than as permitted in any relevant BMJ Author's Self Archiving Policies, I confirm this Work has not been accepted for publication elsewhere, is not being considered for publication elsewhere and does not duplicate material already published. I confirm all authors consent to publication of this Work and authorise the granting of this licence.

# 1 Patient preferences and attitudes towards first choice 2 medical services in Shenzhen, China: a cross-sectional 3 study

4 Zhao Xinyu,<sup>1</sup> Xiao Junhui,<sup>2</sup> Chen Huida,<sup>1</sup> Lin Kena,<sup>1</sup> Li Xiaoman,<sup>1</sup> Zeng Zhiwen,<sup>1</sup>  
5 Huang, Shuyun,<sup>1</sup> Xie Zhikui,<sup>3\*</sup> Du Jinlin<sup>1\*</sup>

6  
7 <sup>1</sup> Department of Epidemiology and Statistics, School of Public Health, Guangdong  
8 Medical University, Dongguan, Guangdong, 52300, China

9 <sup>2</sup> Institute of Health Regulations and Policy, School of Humanities and Management,  
10 Guangdong Medical University, Dongguan, Guangdong, 52300, China

11 <sup>3</sup> Shenzhen Academy of Social Sciences, Shenzhen, Guangdong, 518028, China

12  
13 \*Xie Zhikui and Du Jinlin contribute equally to this work

14 Correspondence to Dr Du Jinlin; dujinlin@gdmu.edu.cn

15 Department of Epidemiology and Statistics, School of Public Health, Guangdong  
16 Medical University, Dongguan, Guangdong, 52300, China

17  
18 Word Count: 5347

## 19 Abstract

20 **Objective:** This study aimed to explore the characteristics of Shenzhen residents'  
21 preferences and influencing factors regarding their first choice of medical institution  
22 at various medical levels, and to understand their attitudes towards community health  
23 services.

24 **Design:** Cross-sectional survey

25 **Participants:** A total of 1612 participants at least 18 years of age were randomly  
26 sampled with stratification among ten districts in Shenzhen. Data were gathered  
27 through a self-designed questionnaire. The effective questionnaire response rate was  
28 93.05%. All patients participated in the study voluntarily, provided written informed  
29 consent and were able to complete the questionnaire.

30 **Main outcome measures:** We measured and compared the participants' expected and  
31 actual preferences and influencing factors regarding their first choice of medical  
32 service at various medical levels.

33 **Results:** More than 50% of the participants preferred municipal and district hospitals  
34 as their first choice, and 27.5% chose medical institutions according to specific  
35 circumstances. Univariate analysis indicated that age, education, income, medical  
36 insurance, housing conditions and registered permanent residence were significantly

1  
2  
3 37 associated with the actual and expected preferred first medical institution. The main  
4 38 factors influencing participants' actual and expected preferred medical institution  
5 39 differed. With the actual preferred first medical institution as the dependent variable,  
6 40 education, monthly income, medical technology, convenience and providers' service  
7 41 attitude, and medical ethics were the main factors ( $\chi^2=212.63$ ,  $P <0.001$ ), whereas  
8 42 with the expected preferred first medical institution as the dependent variable,  
9 43 occupation, Shenzhen registered permanent residence, education and medical  
10 44 technology were the main factors ( $\chi^2=78.101$ ,  $P <0.001$ ).

11 45 **Conclusion:** The main factors influencing participants' preferred medical institution  
12 46 and their actual first visit differed. Patients with high education or income or  
13 47 registered permanent residence preferred high-level medical institutions for the first  
14 48 visit.

15  
16  
17  
18  
19  
20 49 **Keywords:** healthcare preference, medical service, influential factor  
21  
22  
23  
24 50  
25  
26 51  
27  
28  
29 52  
30  
31 53  
32  
33 54  
34  
35 55  
36  
37 56  
38  
39 57  
40  
41 58  
42  
43 59  
44  
45 60  
46  
47 61  
48  
49 62  
50  
51 63  
52  
53  
54  
55  
56  
57  
58  
59  
60

1  
2  
3  
4 64  
5  
6  
7

8 **65 Strengths and limitations**  
9

10 66 ▶ We performed stratified sampling to recruit 1612 participants according to the  
11  
12 67 outpatient records of the Shenzhen Medical System in 2017.

13  
14 68 ▶ We established two logistic regression models to explore the factors in the actual  
15  
16 69 and expected selection of medical institution.

17  
18 70 ▶ Selection bias might have occurred as participants under the age of 18, inpatients or  
19  
20 71 non-patients were not recruited.

21  
22 72 ▶ Future research should include larger samples with various age groups and  
23  
24 73 different disease severities.  
25

26 74  
27  
28

29 75  
30  
31

32 76  
33  
34

35 77  
36  
37

38 78  
39  
40

41 79  
42  
43

44 80  
45  
46

47 81  
48  
49

50 82  
51  
52

53 83  
54  
55

56 84  
57  
58

59 85  
60

86

87

88

## 89 Introduction

90 Hierarchical diagnosis and treatment is an important part of China's medical system  
91 reform, which, starting in 2015, has aimed to direct patient flow through changes in  
92 coverage and reimbursement rates.<sup>1</sup> Medical institutions were classified into three  
93 tiers according to priority and difficulty of treatment: primary medical institutions,  
94 secondary hospitals and tertiary hospitals.<sup>2</sup> This system aims to enable different tiers  
95 of medical institutions to undertake diagnosis and treatment tasks according to their  
96 specialized functions and service capacities. Thus, patients could be appropriately  
97 assigned to different tiers of medical institutions to mitigate difficulties in obtaining  
98 access to medical services.<sup>3</sup> Patients are encouraged to first visit primary institutions,  
99 where patients with severe diseases are referred to secondary or tertiary hospitals if  
100 necessary, and to return to primary medical institutions for rehabilitation when they  
101 are in stable condition. However, the Chinese healthcare system does not use a strict  
102 general practitioner and referral system, and patient preferences and choices regarding  
103 healthcare providers are influenced mainly by personal willingness to seek medical  
104 care. In addition, because the problems of barriers to medical insurance  
105 reimbursement, hospitals' distribution of benefits, patients' preferences for seeking  
106 medical treatment,<sup>4, 5</sup> and the roles of primary medical institutions have not been fully  
107 exerted, and the hierarchical diagnosis and treatment system has not been fully  
108 established.

109 In some countries, health services are delivered in multi-level systems, through a  
110 patient referral procedure involving the coordination of health services among various  
111 levels of health care providers.<sup>6</sup> A notable example is in the United Kingdom, one of  
112 the first countries to strictly follow such a system, through the national health service  
113 law, which established the National Health Service (NHS) in 1948.<sup>7</sup> Although  
114 countries differ in their models used, all maintain a structure that clearly divides labor  
115 in the medical service system, with primary medical and health institutions at the  
116 core, and large hospitals as the auxiliary bodies.<sup>8</sup> Compared with countries in which  
117 the services of specialist doctors are sought directly, countries with "gatekeeper"  
118 systems have a lower proportion of their gross national products comprising medical  
119 service costs.<sup>9</sup>

120 Shenzhen, the youngest first-tier city in China, may slightly differ from other first-tier  
121 cities. Beyond its impressive gross domestic product growth and rapid economic  
122 development, unique challenges are posed by its population size, demographic  
123 structure and resource allocation. For example, with continual population growth, the  
124 non-resident population generally had low education, low income, low residential  
125 stability and young age,<sup>10</sup> and accounted for 63% of the entire population by the end



1  
2  
3 126 of 2019. Because of high property prices, most non-residents purchase or rent  
4 127 self-built or village houses. The resultant spatial pattern that has gradually developed  
5 128 might cause differences in the choice of medical service between non-residents and  
6 129 residents.<sup>11</sup>

7  
8 130 In addition, compared with regions with rapid economic and population growth,  
9 131 Shenzhen has a clear insufficiency of medical resources. The medical expenditure in  
10 132 2018 was 28.1 billion yuan, accounting for only 1.1% of the GDP, a proportion far  
11 133 below the national average (6.43%). The number of beds per 1,000 people in  
12 134 Shenzhen at the end of 2019 was 3.83, far below the national average of 6.30. In  
13 135 China, healthcare is provided almost exclusively by state-owned public general  
14 136 hospitals at the primary, secondary and tertiary levels, and tertiary hospitals have the  
15 137 highest advanced services capacity, followed by the secondary hospitals and primary  
16 138 medical institutions. Under these circumstances, because residents are free to choose  
17 139 healthcare facilities without being restricted by a gatekeeping mechanism, they may  
18 140 bypass primary care and choose –higher level facilities regardless of their disease  
19 141 severity.<sup>12-14</sup> According to the China health statistics yearbook, outpatient services at  
20 142 primary medical and health institutions increased by 2% and 49% for tertiary  
21 143 hospitals between 2013 and 2018.<sup>15</sup>

22  
23 144 These statistics indicate that patients choose their doctors (from primary providers and  
24 145 large hospitals) in an unstructured manner, the service capacity at primary medical  
25 146 and health institutions is insufficient, and continued overcrowding exists in China's  
26 147 hospitals.<sup>16, 17</sup>

27  
28 148 There were 3492 medical and health institutions in Shenzhen in 2017, including 610  
29 149 community health service centers. <sup>18</sup> Although 13.96 million people were covered by  
30 150 basic medical insurance, and more than 4 million residents signed family doctor  
31 151 service agreements, the proportion of residents who chose to seek medical treatment  
32 152 in community health service center was relatively low, accounting for only  
33 153 approximately 38%.<sup>19</sup>

34  
35 154 Many patients prefer to wait for treatment in higher-level hospitals than to visit  
36 155 nearby primary medical institutions. Thus, to improve the implementation efficiency  
37 156 of the hierarchical diagnosis and treatment system, understanding participants'  
38 157 preferences, of attitudes and factors influencing their choice of medical institution is  
39 158 necessary.

40  
41 159 To our knowledge, previous studies on preferences or attitudes towards medical  
42 160 choice have focused mainly on actual health-seeking behavior, <sup>20-22</sup> defined as the  
43 161 actions taken by individuals who perceive they have an illness to obtain a suitable  
44 162 remedy. <sup>23</sup> This behavior involves a series of decision-making processes governed by  
45 163 individual characteristics and beliefs, as well as provider-related features. This  
46 164 process usually involves decisions regarding whether to seek treatment, from whom to  
47 165 seek treatment, what kind of treatment to seek and how many healthcare resources to  
48 166 use.

49  
50 167 Thus, in theory, an individual's healthcare needs do not necessarily translate to  
51 168 effective demand. Similarly, the expected medical institution for an individual's first  
52 169 consultation may differ from the actual selection. The exploration of factors affecting

170 the expected and actual first medical institution may aid in determining the  
171 differences between individual preferences/attitudes towards medical institutions and  
172 their actual healthcare-seeking behaviors. Such understanding is crucial for  
173 strengthening the hierarchical diagnosis and treatment system, because it concerns the  
174 effective allocation and rational use of medical resources.

175 A previous systematic review has analyzed a considerable body of studies and  
176 identified factors affecting the selection of healthcare, such as individual, facility,  
177 context and composite factors, thereby influencing facility choice in China.<sup>22</sup>  
178 However, as China's youngest city, Shenzhen may differ from traditional cities  
179 because of its characteristics including living spaces and population composition. To  
180 better promote reform of the hierarchical diagnosis and treatment system, first  
181 understanding residents' choices of healthcare provider types and the associated  
182 factors is crucial. Therefore, the current study was aimed at (1) exploring residents'  
183 expected and actual preferences and influencing factors regarding the choice of first  
184 medical service at various medical levels; (2) understanding residents' attitudes  
185 towards community health services.

## 186 **Methods**

### 187 **Participants**

188 Subjects were selected according to the outpatient records of the Shenzhen Medical  
189 System in 2017. According to a pilot study, the awareness rate of the hierarchical  
190 diagnosis and treatment system was 40%, with a maximum permissible error of 2.5%  
191 and confidence interval of 95%, and the required sample size was calculated to be  
192 1475. To account for invalid questionnaires, the sample size was increased by 9%,  
193 and a total of 1612 participants were finally investigated. Stratified sampling was  
194 performed, and the number of participants varied according to the number of residents  
195 in each district. The final numbers of participants from each district were 210 (14.0%)  
196 in the Futian District, 210 (14.0%) in the Luohu District, 210 (14.0%) in the Nanshan  
197 District, 50 (3.3%) in the Yantian District, 260 (17.3%) in the Bao'an District, 260  
198 (17.3%) in the Longgang District, 150 (10.0%) in the Longhua District, 50 (3.3%) in  
199 the Pingshan District, 50 (3.3%) in the Guangming District and 50 (3.3%) in the  
200 Dapeng New District. One resident at least 18 years of age was then selected from  
201 each household. The inclusion criteria were participants living in Shenzhen for  $\geq 6$   
202 months and agreeing to sign an informed consent form, with good mental status and  
203 clear consciousness. The exclusion criteria were participants with severe mental  
204 illness or cognitive communication difficulties. All participants participated  
205 voluntarily and provided written informed consent.

### 206 **Data collection**

207 Selected participants were first contacted by telephone to ensure that they understood  
208 and agreed to participate in the survey. A questionnaire entitled "Questionnaire on  
209 medical preference and behavior of Shenzhen residents" was administered

210 face-to-face. Items were initially identified on the basis of the literature and selected  
211 after three expert consultations. The final version of the questionnaire was determined  
212 after modification on the basis of a pilot study.

213 For measuring the expected preferred first medical institution, the question “If  
214 conditions permit, what type of medical institution would you like to choose for the  
215 first consultation?” was asked, and the answers were as follows: “① municipal  
216 hospitals, ② district hospitals, ③ street hospitals, ④ private medical institutions,  
217 ⑤ community health service centers, ⑥ other hospitals or ⑦ depends on the  
218 situation.” For measuring the actual preferred first medical institution, the question “If  
219 you were unwell, what type of medical institution would you choose?” was asked, and  
220 the answers were as follows: “① municipal hospitals, ② district hospitals, ③ street  
221 hospitals, ④ private medical institutions, ⑤ community health service centers, ⑥  
222 other hospitals or ⑦ depends on the situation.” The investigation was conducted by  
223 uniformly trained investigators, and the quality was strictly controlled throughout the  
224 entire investigation.

## 225 **Statistical analysis**

226 All data were entered by two researchers simultaneously in Epidata 3.02. SPSS 25.0  
227 was used for data cleaning, sorting and statistical analysis. Descriptive statistics were  
228 used to describe participants’ characteristics. The relationships between medical  
229 service seeking preference and various factors were analyzed with  $\chi^2$  tests. The  
230 difference between the understanding of the community first consultation system and  
231 the approval level of the community first consultation system was also determined  
232 with  $\chi^2$  and linear trend tests. Multivariate logistic regression analysis was then  
233 performed to explore the factors affecting the preferences regarding medical services,  
234 and all the potential independent variables were entered by the forced entry method.  
235 All tests were two-sided, and the significance level was set at  $P < 0.05$ .

## 236 **Ethnic statement**

237 The study was approved by the Ethics Committee of the Affiliated Hospital of  
238 Guangdong Medical University (ethical approval number: YJ2017045-1). All  
239 participants were aware of the aims and objectives of the study, informed that  
240 participation was voluntary and their data would remain confidential, and provided  
241 written informed consent.

## 242 **Patient and public involvement**

243 There has been no patient and/or public involvement in the study design, data analysis  
244 and writing of the current study. The brief results were emailed to each participant  
245 after the investigation.

246 **Results**247 **Testing of the questionnaire**

248 The reliability and validity of the questionnaire were good, with overall internal  
 249 consistency, a Cronbach  $\alpha$  coefficient of 0.826, Kaiser-Meyer-Olkin index of 0.791  
 250 and-cumulative contribution rate of 6 factors of 81.959%.

251 **Participant characteristics**

252 The characteristics of the participants are shown in **Table 1**. The average age was  
 253  $34.3 \pm 10.0$  years, and the age composition was close to that of Shenzhen residents in  
 254 the 2010 population census.

255 **Table 1 Basic characteristics of participants**

| Category                        | n (%)     | Category                          | n (%)     |
|---------------------------------|-----------|-----------------------------------|-----------|
| <b>Sex</b>                      |           | <b>Monthly incomes (CNY)</b>      |           |
| Male                            | 733(48.9) | <3000                             | 158(10.5) |
| Female                          | 767(51.1) | 3000~                             | 479(31.9) |
| <b>Age(years)</b>               |           | 5000~                             | 626(41.7) |
| <20                             | 56(3.7)   | 10000~                            | 158(10.5) |
| 21-30                           | 607(40.5) | 15000~                            | 53(3.5)   |
| 31-40                           | 520(34.7) | $\geq 30000$                      | 26(1.7)   |
| 41-50                           | 204(13.6) | <b>Housing conditions</b>         |           |
| $\geq 51$                       | 113(7.5)  | Self-purchased housing            | 351(23.4) |
| <b>Educational level</b>        |           | Renting policy housing            | 114(7.6)  |
| Junior high school and below    | 222(14.8) | Renting housing in Urban Villages | 618(41.2) |
| High school/technical secondary | 581(38.7) | Renting commercial housing        | 170(11.3) |
| junior college                  | 431(28.7) | Dormitory                         | 94(6.3)   |
| Undergraduate                   | 242(16.1) | Others                            | 153(10.2) |
| Post undergraduate              | 24(1.6)   | <b>Medical insurance</b>          |           |
| <b>Occupation</b>               |           | Level 1                           | 663(44.2) |
| public institutions             | 153(10.2) | Level 2                           | 336(22.4) |
| professional and technical      | 224(14.9) | Level 3                           | 187(12.5) |
| Enterprise managers             | 156(10.4) | Uninsured                         | 314(20.9) |
| Enterprise staff                | 208(13.9) | <b>Marital status</b>             |           |

|                                                 |           |                                       |            |
|-------------------------------------------------|-----------|---------------------------------------|------------|
| Individual industrial and commercial households | 228(15.2) | Single                                | 435(29.0)  |
|                                                 |           | Married                               | 1065(71.0) |
| Worker                                          | 342(22.8) | <b>Registered permanent residence</b> |            |
| Unemployed                                      | 53(3.5)   | Registered                            | 531(35.4)  |
| Others                                          | 136(9.1)  | Non-registered                        | 969(64.6)  |

## 256 **Actual and expected preferred first medical institution**

257 In terms of the actual first medical institution, because the proportion of choosing  
 258 private medical institutions was very small, and a clearly stated medical preference  
 259 would enable analysis of participants' needs and influencing factors, we excluded 25  
 260 participants choosing private medical institutions and 412 participants choosing  
 261 medical institutions depending on specific circumstances. Further analysis was  
 262 conducted on the remaining 1063 participants with specific preferences. The  
 263 percentages of actual first medical institutions between sexes are shown in **Table 2**.  
 264 More than 50% of participants chose municipal or district hospitals as their first  
 265 choice. No statistically significant difference was observed in the actual medical  
 266 institution selection among municipal, district-level, street-level and community  
 267 health service between sexes ( $\chi^2=5.034$ ,  $P=0.169$ ).

268 Similarly, in terms of the expected preferred first medical institution, because no  
 269 participants indicated that they would choose a private medical institution, and 396  
 270 indicated that they would choose according to specific circumstances, we excluded  
 271 these 396 participants and conducted further analysis on the remaining 1104  
 272 participants with specific preferences. The percentages of the expected preferred first  
 273 medical institutions between sexes are shown in **Table 2**. More than three-quarters of  
 274 participants expected to choose municipal and district-level hospitals for the first visit.  
 275 No statistically significant difference was observed among the 1104 participants with  
 276 a specific first medical institution choice between sexes ( $\chi^2=2.843$ ,  $P=0.416$ ).

277 **Table 2 Selection of actual and expected preferred medical institutions in subjects with different demographic characteristics (n, %)**

| Variables | Actual selection                  |                         |                             |                                      |            | Expected selection       |                         |                             |                                      |            |             |
|-----------|-----------------------------------|-------------------------|-----------------------------|--------------------------------------|------------|--------------------------|-------------------------|-----------------------------|--------------------------------------|------------|-------------|
|           | Municipal hospitals n(%)          | District hospitals n(%) | Street-level hospitals n(%) | Community Health Service Center n(%) | Total n(%) | Municipal hospitals n(%) | District hospitals n(%) | Street-level hospitals n(%) | Community Health Service Center n(%) | Total n(%) |             |
| Sex       | Male                              | 154(29.8)               | 143(27.7)                   | 73(14.2)                             | 146(28.3)  | 516(100.0)               | 318(59.6)               | 147(27.5)                   | 38(7.1)                              | 31(5.8)    | 534(100.0)  |
|           | Female                            | 162(29.6)               | 161(29.4)                   | 54(9.9)                              | 170(31.1)  | 547(100.0)               | 328(57.5)               | 165(29.0)                   | 52(9.1)                              | 25(4.4)    | 570(100.0)  |
|           | Total                             | 316(29.7)               | 304(28.6)                   | 127(12.0)                            | 316(29.7)  | 1063(100.0)              | 646(58.4)               | 312(28.3)                   | 90(8.2)                              | 56(5.1)    | 1104(100.0) |
| Age       | <21                               | 6(18.7)                 | 2(6.3)                      | 2(6.3)                               | 22(68.7)   | 32(100.0)                | 17(46.0)                | 10(27.0)                    | 8(21.6)                              | 2(5.4)     | 37(100.0)   |
|           | 21~                               | 131(32.1)               | 112(27.5)                   | 53(12.9)                             | 112(27.5)  | 408(100.0)               | 262(59.3)               | 120(27.1)                   | 39(8.8)                              | 21(4.8)    | 442(100.0)  |
|           | 31~                               | 98(26.2)                | 121(32.4)                   | 46(12.3)                             | 109(29.1)  | 374(100.0)               | 211(55.5)               | 124(32.6)                   | 28(7.4)                              | 17(4.5)    | 380(100.0)  |
|           | 41~                               | 56(35.4)                | 44(27.8)                    | 16(10.1)                             | 42(26.7)   | 158(100.0)               | 96(62.7)                | 42(27.5)                    | 7(4.6)                               | 8(5.2)     | 153(100.0)  |
|           | ≥51                               | 25(27.5)                | 25(27.5)                    | 10(11.0)                             | 31(34.0)   | 91(100.0)                | 60(65.2)                | 16(17.4)                    | 8(8.7)                               | 8(8.7)     | 92(100.0)   |
|           | Total                             | 316(29.7)               | 304(28.6)                   | 127(12.0)                            | 316(29.7)  | 1063(100.0)              | 646(58.4)               | 312(28.3)                   | 90(8.2)                              | 56(5.1)    | 1104(100.0) |
| Education | Junior high school and below      | 28(20.0)                | 29(20.7)                    | 15(10.7)                             | 68(48.6)   | 140(100.0)               | 81(53.0)                | 41 (26.8)                   | 19(12.4)                             | 12(7.8)    | 153(100.0)  |
|           | High school / technical secondary | 102(25.1)               | 123(30.3)                   | 46(11.3)                             | 135(33.3)  | 406(100.0)               | 232(55.0)               | 134 (31.7)                  | 35(8.3)                              | 21(5.0)    | 422(100.0)  |
|           | junior college                    | 95(29.3)                | 99(30.6)                    | 47(14.5)                             | 83(25.6)   | 324(100.0)               | 196(59.9)               | 97 (29.7)                   | 20(6.1)                              | 14(4.3)    | 327(100.0)  |
|           | undergraduate and above           | 91(47.2)                | 53(27.5)                    | 19(9.8)                              | 30(15.5)   | 193(100.0)               | 137(67.8)               | 40 (19.8)                   | 16(7.9)                              | 9(4.5)     | 202(100.0)  |
|           | Total                             | 316(29.7)               | 304(28.6)                   | 127(12.0)                            | 316(29.7)  | 1063(100.0)              | 646(58.4)               | 312(28.3)                   | 90(8.2)                              | 56(5.1)    | 1104(100.0) |

| Variables          | Actual selection                  |                         |                             |                                      |            | Expected selection       |                         |                             |                                      |            |             |
|--------------------|-----------------------------------|-------------------------|-----------------------------|--------------------------------------|------------|--------------------------|-------------------------|-----------------------------|--------------------------------------|------------|-------------|
|                    | Municipal hospitals n(%)          | District hospitals n(%) | Street-level hospitals n(%) | Community Health Service Center n(%) | Total n(%) | Municipal hospitals n(%) | District hospitals n(%) | Street-level hospitals n(%) | Community Health Service Center n(%) | Total n(%) |             |
| Monthly income     | <3000                             | 37(32.7)                | 28(24.8)                    | 9(8.0)                               | 39(34.5)   | 113(100.0)               | 74(60.2)                | 29 (23.5)                   | 13(10.6)                             | 7(5.7)     | 123(100.0)  |
|                    | 3000~                             | 65(19.0)                | 74(21.6)                    | 48(14.1)                             | 155(45.3)  | 342(100.0)               | 194(52.3)               | 107(28.8)                   | 50(13.5)                             | 20(5.4)    | 371(100.0)  |
|                    | 5000~                             | 123(28.4)               | 158(36.5)                   | 54(12.5)                             | 98(22.6)   | 433(100.0)               | 246(57.3)               | 149(34.8)                   | 19(4.4)                              | 15(3.5)    | 429(100.0)  |
|                    | 10000~                            | 54(44.3)                | 37(30.3)                    | 12(9.8)                              | 19(15.6)   | 122(100.0)               | 88(72.7)                | 17(14.1)                    | 7(5.8)                               | 9(7.4)     | 121(100.0)  |
|                    | ≥15000                            | 37(69.8)                | 7(13.2)                     | 4(7.6)                               | 5(9.4)     | 53(100.0)                | 44(73.3)                | 10(16.7)                    | 1(1.7)                               | 5(8.3)     | 60(100.0)   |
|                    | Total                             | 316(29.7)               | 304(28.6)                   | 127(12.0)                            | 316(29.7)  | 1063(100.0)              | 646(58.5)               | 312(28.3)                   | 90(8.2)                              | 56(5.1)    | 1104(100.0) |
| Medical insurance  | Level 1                           | 179(36.2)               | 149(30.1)                   | 51(10.3)                             | 116(23.4)  | 495(100.0)               | 316(65.2)               | 129(26.5)                   | 27(5.6)                              | 13(2.7)    | 485(100.0)  |
|                    | Level 2                           | 55(21.1)                | 92(35.2)                    | 40(15.3)                             | 74(28.4)   | 261(100.0)               | 136(50.9)               | 89(33.3)                    | 24(9.0)                              | 18(6.8)    | 267(100.0)  |
|                    | Level 3                           | 23(16.7)                | 44(31.9)                    | 17(12.3)                             | 54(39.1)   | 138(100.0)               | 71(45.2)                | 51(32.5)                    | 22(14.0)                             | 13(8.3)    | 157(100.0)  |
|                    | Uninsured                         | 59(34.9)                | 19(11.2)                    | 19(11.2)                             | 72(42.7)   | 169(100.0)               | 123(63.1)               | 43(22.1)                    | 17(8.6)                              | 12(6.2)    | 195(100.0)  |
|                    | Total                             | 316(29.7)               | 304(28.7)                   | 127(11.9)                            | 316(29.7)  | 1063(100.0)              | 646(58.4)               | 312(28.3)                   | 90(8.2)                              | 56(5.1)    | 1104(100.0) |
| Housing conditions | Self-purchased housing            | 110(39.6)               | 92(33.1)                    | 25(9.0)                              | 51(18.3)   | 278(100.0)               | 168(62.7)               | 71(26.5)                    | 15(5.6)                              | 14(5.2)    | 268(100.0)  |
|                    | Renting policy housing            | 15(20.1)                | 36(48.0)                    | 11(14.6)                             | 13(17.3)   | 75(100.0)                | 41(54.0)                | 22(28.9)                    | 6(7.9)                               | 7(9.2)     | 76(100.0)   |
|                    | Renting housing in Urban Villages | 93(21.9)                | 114(26.8)                   | 65(15.3)                             | 153(36.0)  | 425(100.0)               | 222(49.8)               | 154(34.5)                   | 50(11.2)                             | 20(4.5)    | 446(100.0)  |
|                    | Renting commercial housing        | 56(39.2)                | 29(20.3)                    | 8(5.6)                               | 50(34.9)   | 143(100.0)               | 103(70.5)               | 30(20.5)                    | 8(5.5)                               | 5(3.5)     | 146(100.0)  |

| Variables                             | Actual selection            |                            |                                |                                         |               | Expected selection          |                            |                                |                                         |               |
|---------------------------------------|-----------------------------|----------------------------|--------------------------------|-----------------------------------------|---------------|-----------------------------|----------------------------|--------------------------------|-----------------------------------------|---------------|
|                                       | Municipal hospitals<br>n(%) | District hospitals<br>n(%) | Street-level hospitals<br>n(%) | Community Health Service Center<br>n(%) | Total<br>n(%) | Municipal hospitals<br>n(%) | District hospitals<br>n(%) | Street-level hospitals<br>n(%) | Community Health Service Center<br>n(%) | Total<br>n(%) |
| Dormitory                             | 13(23.2)                    | 14(25.1)                   | 4(7.1)                         | 25(44.6)                                | 56(100.0)     | 51(65.4)                    | 17(21.8)                   | 6(7.7)                         | 4(5.1)                                  | 78(100.0)     |
| Others                                | 29(33.7)                    | 19(22.1)                   | 14(16.3)                       | 24(27.9)                                | 86(100.0)     | 61(67.7)                    | 18(20.0)                   | 5(5.6)                         | 6(6.7)                                  | 90(100.0)     |
| Total                                 | 316(29.7)                   | 304(28.7)                  | 127(11.9)                      | 316(29.7)                               | 1063(100.0)   | 646(58.4)                   | 312(28.3)                  | 90(8.2)                        | 56(5.1)                                 | 1104(100.0)   |
| Single                                | 86(33.5)                    | 58(22.5)                   | 35(13.6)                       | 78(30.4)                                | 257(100.0)    | 192(64.6)                   | 59(19.9)                   | 31(10.4)                       | 15(5.1)                                 | 297(100.0)    |
| Marital status<br>Married             | 230(28.6)                   | 246(30.5)                  | 92(11.4)                       | 238(29.5)                               | 806(100.0)    | 454(56.3)                   | 253(31.3)                  | 59(7.3)                        | 41(5.1)                                 | 807(100.0)    |
| Total                                 | 316(29.7)                   | 304(28.7)                  | 127(11.9)                      | 316(29.7)                               | 1063(100.0)   | 646(58.4)                   | 312(28.3)                  | 90(8.2)                        | 56(5.1)                                 | 1104(100.0)   |
| Registered permanent residence<br>Yes | 138(34.7)                   | 140(35.2)                  | 34(8.5)                        | 86(21.6)                                | 398(100.0)    | 254(65.3)                   | 100(25.7)                  | 21(5.4)                        | 14(3.6)                                 | 398(100.0)    |
| No                                    | 178(26.8)                   | 164(24.7)                  | 93(14.1)                       | 230(34.6)                               | 665(100.0)    | 392(54.8)                   | 212(29.6)                  | 69(9.7)                        | 42(5.9)                                 | 665(100.0)    |
| Total                                 | 316(29.7)                   | 304(28.7)                  | 127(11.9)                      | 316(29.7)                               | 1063(100.0)   | 646(58.4)                   | 312(28.3)                  | 90(8.2)                        | 56(5.1)                                 | 1104(100.0)   |



## 279 **Demographic characteristics and preferred first medical institution**

280 The demographic characteristics, including age, education, income, medical  
281 insurance, housing condition, marital status and registered permanent residence,  
282 grouped by the selection of actual and expected preferred medical institutions, are  
283 presented in **Table 2**.

### 284 Age

285 Significant differences were observed in the levels of both actual ( $\chi^2=33.257$ ,  
286  $P=0.001$ ) and expected medical institutions ( $\chi^2=23.415$ ,  $P=0.024$ ) among the age  
287 groups. In terms of the actual first medical institution, the largest proportion of  
288 participants indicating municipal medical institutions as their first choice was  
289 observed in the age groups of 21-30 and 41-50 years. The largest proportion choosing  
290 community health service centers was observed in the 20-year age group, with a  
291 percentage of 68.8%. In terms of the expected first medical institution, with  
292 increasing age participants expected to choose higher level medical institutions. The  
293 proportion of participants choosing municipal hospitals was the largest in each age  
294 group, ranging from 45.9% to 65.2%.

### 295 Education

296 Participants with different educational backgrounds had varying preferences for actual  
297 ( $\chi^2=67.169$ ,  $P<0.001$ ) and expected medical institutions ( $\chi^2=20.079$ ,  $P=0.017$ ). Those  
298 with high educational levels were more inclined to choose high-level medical  
299 institutions for the first visit. Linear trends were observed between education levels  
300 and actual ( $\chi^2=54.189$ ,  $P<0.0001$ ) or expected medical institutions ( $\chi^2=9.998$ ,  
301  $P=0.002$ ).

### 302 Income

303 Significant differences were observed in the levels of actual ( $\chi^2=127.362$ ,  $P<0.001$ )  
304 and expected medical institutions ( $\chi^2=57.767$ ,  $P<0.001$ ) among participants with  
305 differing incomes. Linear trends were observed between monthly income and the  
306 actual ( $\chi^2=62.024$ ,  $P<0.0001$ ) or expected medical institutions ( $\chi^2=5.569$ ,  $P=0.018$ ).  
307 Those with high monthly income were more inclined to choose high level first visit  
308 medical institutions. In terms of the expected medical institution, more than 50% of  
309 the participants in all monthly income groups chose a municipal hospital as their first  
310 medical institution, of which the largest proportion was observed in the groups with  
311 incomes of 10000-14999 yuan and more than 15000 yuan, at 72.7% and 73.3%,  
312 respectively.

1  
2  
3  
4 313 **Medical insurance**  
5

6 314 Significant differences were observed in the levels of ( $\chi^2=69.656$ ,  $P<0.001$ ) and  
7 315 expected medical institutions ( $\chi^2=39.734$ ,  $P<0.001$ ) among participants with differing  
8 316 medical insurance levels. Linear trends were observed between medical insurance  
9 317 levels and actual ( $\chi^2=26.885$ ,  $P<0.001$ ) or expected medical institutions ( $\chi^2=10.450$ ,  
10 318  $P=0.001$ ). Participants with lower levels of medical insurance were more inclined to  
11 319 choose community health service centers. In terms of the expected medical institution,  
12 320 the proportion choosing municipal hospitals was highest, ranging from 45.2% to  
13 321 65.2%.

14  
15  
16  
17  
18 322 **Housing conditions**  
19

20  
21 323 Participants with different housing conditions had different preferences for actual  
22 324 ( $\chi^2=84.040$ ,  $P<0.001$ ) and expected medical institutions ( $\chi^2=38.790$ ,  $P=0.001$ ). In  
23 325 terms of the actual medical institutions, the proportion of participants who had  
24 326 self-purchased houses and or were renting commercial houses who chose municipal  
25 327 hospitals as their first medical institution was the highest, at 39.6% and 39.2%,  
26 328 respectively. The proportion of participants renting policy housing who chose  
27 329 district-level hospitals was highest, at 48.0%. The proportion of participants living in  
28 330 dormitories who chose community health service centers was highest, at 44.6%. In  
29 331 terms of the expected medical institution, the proportion of participants choosing  
30 332 municipal hospitals was highest in all groups with different housing conditions. The  
31 333 overall proportion of participants choosing community health service centers was only  
32 334 5.1%, ranging from 3.4% to 9.2% in all groups.

33  
34  
35  
36  
37  
38 335 **Marital status**  
39

40  
41 336 No statistically significant difference was observed in the actual medical institution  
42 337 selection according to marital status ( $\chi^2=6.738$ ,  $P=0.081$ ). The proportions of  
43 338 participants choosing municipal hospitals and community health service centers were  
44 339 the highest for single participants, at 33.5% and 30.4%, respectively. However, a  
45 340 significant difference in expected medical institutions was observed according to  
46 341 marital status ( $\chi^2=15.348$ ,  $P=0.002$ ). The proportion of participants expecting to  
47 342 choose municipal hospitals was highest among both single and married participants, at  
48 343 64.6% and 56.3%, respectively. Only 5.1% of the participants indicated that they  
49 344 would choose community health service centers.

50  
51  
52  
53  
54 345 **Registered permanent residence**  
55

56  
57 346 Significant differences were observed in the level of actual ( $\chi^2=35.141$ ,  $P<0.001$ ) and  
58 347 expected medical institutions ( $\chi^2=14.263$ ,  $P=0.003$ ) among participants with different  
59  
60

348 registered permanent residence. In terms of actual medical institutions, participants  
 349 with a Shenzhen registered permanent residence were more inclined to choose  
 350 municipal and district-level hospitals, at 34.7% and 35.2%, respectively. Participants  
 351 without a Shenzhen registered permanent residence were more inclined to choose  
 352 community health service centers, at 34.6%. Participants with and without Shenzhen  
 353 registered permanent residence both expected to choose municipal hospitals and  
 354 district-level hospitals as their second choice.

### 355 **Factors influencing the choice of medical institution**

356 Major factors in the selection of medical institution are shown in **Table 3**. More than  
 357 70% of the participants considered medical technology and convenience the main  
 358 factors in choosing a medical institution. A total of 14.04% and 12.68% of  
 359 participants considered service attitude and medical price, respectively, in choosing a  
 360 medical institution. Only 2.80% considered specific circumstances.

361

362 **Table 3 Factors influencing the choice of medical institution (n, %)**

| Factors                                 | Municipal hospital | District-level hospital | Street-level hospital | Community health service | Total       |
|-----------------------------------------|--------------------|-------------------------|-----------------------|--------------------------|-------------|
| Medical technology                      | 350 (73.5)         | 96 (20.2)               | 15 (3.2)              | 15 (3.2)                 | 476(100.0)  |
| Convenience                             | 127 (42.1)         | 126 (41.7)              | 30 (9.9)              | 19 (6.3)                 | 302(100.0)  |
| Attitude of service and medical ethnics | 93 (60.0)          | 29 (18.7)               | 24 (15.5)             | 9 (5.8)                  | 155(100.0)  |
| Price                                   | 57 (40.7)          | 55 (39.3)               | 20 (11.8)             | 8 (5.7)                  | 140(100.0)  |
| Others                                  | 19 (61.3)          | 6 (19.4)                | 1 (3.2)               | 5 (16.1)                 | 31(100.0)   |
| Total                                   | 646(58.5)          | 312(28.3)               | 90(8.2)               | 56(5.1)                  | 1104(100.0) |

### 363 **Understanding of the community first diagnosis system**

364 Participants did not have a high level of understanding of the community first  
 365 diagnosis system, as shown in **Table 4**. Only 3.67% of the participants were very  
 366 familiar with the community first diagnosis system, whereas 59.53% were less  
 367 familiar or unfamiliar. In participants who were unfamiliar with the community first  
 368 diagnosis system, only 18.7% agreed with this system, and 71.7% were indifferent.  
 369 Participants with better understanding of the community first diagnosis system were  
 370 more in favor of the community first diagnosis system ( $\chi^2=177.805$ ,  $P<0.0001$ ). A  
 371 linear trend was observed between understanding and agreement with community first  
 372 diagnosis ( $\chi^2=145.327$ ,  $P<0.0001$ ).

373

374

375

376

377

378

379

380

381 **Table 4 Analysis of the understanding and agreement on the community first**  
 382 **diagnosis system(n, %)**

| Whether understanding community first | agree      | disagree  | unconcerned | Total       |
|---------------------------------------|------------|-----------|-------------|-------------|
| Very familiar                         | 32 (58.2)  | 10 (18.2) | 13 (23.6)   | 55 (3.67)   |
| Quite familiar                        | 99 (61.9)  | 16 (10.0) | 45 (28.1)   | 160 (10.67) |
| Moderately familiar                   | 221 (56.4) | 32 (8.2)  | 139 (35.5)  | 392 (26.13) |
| Less familiar                         | 210 (42.3) | 64 (12.9) | 223 (44.9)  | 497 (33.13) |
| Unfamiliar                            | 74 (18.7)  | 38 (9.6)  | 284 (71.7)  | 396 (26.40) |

### 383 Main factors affecting participants' medical institution preferences

384 We established two logistic regression models to explore the factors in the selection  
 385 of medical institution. The dependent variables were the actual and expected first  
 386 medical institution in models 1 and 2, respectively. The dependent variable was  
 387 further divided into two categories, with street-level hospital, community health  
 388 service center and private hospital as "0" and municipal and district-level hospitals as  
 389 "1". Independent variables and their definitions were the same, including age,  
 390 education, occupation, registered permanent residence, marital status, monthly  
 391 income, housing conditions and medical insurance, which were selected on the basis  
 392 of statistical significance in single factor analysis of the preferred first medical  
 393 institution. The main factors in choosing a medical institution and agreement on the  
 394 community first diagnosis system were also considered as the independent variables.  
 395 Occupation, housing conditions, the main factors in choosing a medical institution  
 396 and agreement on the community first diagnosis system were dummified, with other  
 397 occupation, other housing condition, medical price and unconcerned attitude towards  
 398 the community first diagnosis system, as a reference, respectively. Other independent  
 399 variables included age  $\leq 20$  years, Shenzhen registered permanent residence and  
 400 unmarried status as a reference. Monthly income, education, medical insurance and  
 401 understanding of the community first diagnosis system served as ordered variables.  
 402 In model 1, education, monthly income and the main factors in choosing a medical  
 403 institution affected participants' actual medical institution. A statistically significant

1  
2  
3 404 difference was observed in the regression equation ( $\chi^2=212.63$ ,  $P<0.001$ ), with  
4 405  $-2\log=1231.393$  and correction coefficient of determination  $r^2=0.244$ . The prediction  
5 406 accuracy rate was 70.9%. Participants with higher education and higher monthly  
6 407 income, were more inclined to choose municipal or district-level hospitals. As  
7 408 compared with medical price, the main factors considered when choosing large  
8 409 hospitals were medical technology, convenience, providers' service attitude, and  
9 410 medical ethics. Among these factors, medical technology was more important. In  
10 411 addition, the better the participants understood the community first diagnosis system,  
11 412 the more difficult the choice of large hospitals, as shown in **Table 5**.

12 413 In model 2, occupation, registered permanent residence and the main factors in  
13 414 choosing a medical institution affected participants' expected medical institution. A  
14 415 statistically significant difference was observed in the logistic regression, with  $-2\log$   
15 416  $=784.420$  ( $\chi^2=78.101$ ,  $P<0.001$ ) and correction coefficient of determination  $r^2=0.126$ .  
16 417 The prediction accuracy rate is 86.6%. Participants working in public institutions or  
17 418 enterprises, and those with individual industrial and commercial households were  
18 419 more inclined to choose city-level or district-level hospitals. Compared with  
19 420 participants with Shenzhen registered permanent residence, those without Shenzhen  
20 421 registered permanent residence were more inclined to choose street hospitals and  
21 422 community health service centers. As compared with medical price, medical  
22 423 technology was the main factor considered in choosing a large hospital , as shown in  
23 424 **Table 5**.

425 **Table 5 Logistics regression analysis of the factors affecting subjects' actual and expected first medical institution.**

| Variable                                                    | Model 1: Actual Selection Model |           |                      |                       |           |                         | Model 2: Expected Selection Model |           |                      |                       |           |                         |
|-------------------------------------------------------------|---------------------------------|-----------|----------------------|-----------------------|-----------|-------------------------|-----------------------------------|-----------|----------------------|-----------------------|-----------|-------------------------|
|                                                             | <i>B</i>                        | <i>SE</i> | <i>Wald</i> $\chi^2$ | <i>P</i> <sup>b</sup> | <i>OR</i> | <i>OR</i> 95% <i>CI</i> | <i>b</i>                          | <i>SE</i> | <i>Wald</i> $\chi^2$ | <i>P</i> <sup>b</sup> | <i>OR</i> | <i>OR</i> 95% <i>CI</i> |
| Constant                                                    | -0.292                          | 0.682     | 0.184                | 0.668                 | 0.747     | -                       | 0.802                             | 0.904     | 0.788                | 0.375                 | 2.230     | -                       |
| Age group                                                   | -0.117                          | 0.087     | 1.836                | 0.175                 | 0.889     | 0.751-1.054             | -0.017                            | 0.115     | 0.021                | 0.885                 | 0.984     | 0.785-1.232             |
| Education                                                   | 0.178                           | 0.090     | 3.904                | 0.048                 | 1.195     | 1.001-1.425             | 0.026                             | 0.117     | 0.047                | 0.828                 | 1.026     | 0.815-1.291             |
| Occupation(Others as the reference)                         | -                               | -         | 7.775                | 0.255                 | -         | -                       | -                                 | -         | 12.919               | 0.044                 | -         | -                       |
| public institutions                                         | -0.164                          | 0.314     | 0.273                | 0.602                 | 0.849     | 0.458-1.571             | 1.131                             | 0.458     | 6.094                | 0.014                 | 3.098     | 1.262-7.604             |
| professional and technical personnel                        | -0.224                          | 0.289     | 0.598                | 0.439                 | 0.800     | 0.454-1.409             | 0.195                             | 0.336     | 0.335                | 0.563                 | 1.215     | 0.629-2.348             |
| Enterprise managers                                         | 0.344                           | 0.311     | 1.225                | 0.268                 | 1.411     | 0.767-2.595             | 0.732                             | 0.403     | 3.297                | 0.069                 | 2.080     | 0.944-4.583             |
| Enterprise staff                                            | -0.340                          | 0.284     | 1.439                | 0.230                 | 0.712     | 0.408-1.241             | 0.773                             | 0.359     | 4.619                | 0.032                 | 2.165     | 1.070-4.380             |
| Individual industrial and commercial households             | 0.048                           | 0.279     | 0.030                | 0.863                 | 1.049     | 0.607-1.813             | 0.924                             | 0.387     | 5.717                | 0.017                 | 2.520     | 1.181-5.377             |
| Worker                                                      | -0.235                          | 0.258     | 0.834                | 0.361                 | 0.790     | 0.477-1.310             | 0.551                             | 0.308     | 3.196                | 0.074                 | 1.735     | 0.948-3.175             |
| Registered permanent residence(Registered as the reference) | -0.324                          | 0.176     | 3.374                | 0.066                 | 0.723     | 0.512-1.022             | -0.500                            | 0.250     | 3.990                | 0.046                 | 0.607     | 0.371-0.991             |
| Marital status                                              | 0.068                           | 0.186     | 0.134                | 0.715                 | 1.070     | 0.743-1.542             | 0.161                             | 0.245     | 0.431                | 0.512                 | 1.175     | 0.726-1.900             |
| Monthly income                                              | 0.237                           | 0.092     | 6.588                | 0.010                 | 1.267     | 1.058-1.518             | 0.136                             | 0.126     | 1.159                | 0.282                 | 1.145     | 0.895-1.467             |
| Housing conditions(Others as the reference)                 | -                               | -         | 6.862                | 0.231                 | -         | -                       | -                                 | -         | 4.134                | 0.530                 | -         | -                       |
| Self-purchased housing                                      | 0.359                           | 0.296     | 1.469                | 0.225                 | 1.432     | 0.801-2.561             | -0.470                            | 0.414     | 1.290                | 0.256                 | 0.625     | 0.278-1.407             |

|    |                          |        |       |        |        |       |              |        |       |        |        |       |             |
|----|--------------------------|--------|-------|--------|--------|-------|--------------|--------|-------|--------|--------|-------|-------------|
| 1  |                          |        |       |        |        |       |              |        |       |        |        |       |             |
| 2  |                          |        |       |        |        |       |              |        |       |        |        |       |             |
| 3  |                          |        |       |        |        |       |              |        |       |        |        |       |             |
| 4  |                          |        |       |        |        |       |              |        |       |        |        |       |             |
| 5  | Renting policy housing   | 0.490  | 0.363 | 1.816  | 0.178  | 1.632 | 0.801-3.327  | -0.580 | 0.472 | 1.511  | 0.219  | 0.560 | 0.222-1.411 |
| 6  | Renting housing in Urban | -0.107 | 0.266 | 0.162  | 0.687  | 0.898 | 0.533-1.513  | -0.279 | 0.367 | 0.575  | 0.448  | 0.757 | 0.368-1.555 |
| 7  | Villages                 |        |       |        |        |       |              |        |       |        |        |       |             |
| 8  | Renting commercial       | 0.070  | 0.309 | 0.051  | 0.822  | 1.072 | 0.585-1.963  | 0.022  | 0.459 | 0.002  | 0.962  | 1.022 | 0.416-2.513 |
| 9  | housing                  |        |       |        |        |       |              |        |       |        |        |       |             |
| 10 | Dormitory                | 0.088  | 0.389 | 0.051  | 0.822  | 1.092 | 0.509-2.340  | 0.123  | 0.499 | 0.060  | 0.806  | 1.131 | 0.425-3.007 |
| 11 | Medical insurance        | -0.083 | 0.072 | 1.327  | 0.249  | 0.920 | 0.798-1.060  | -0.153 | 0.094 | 2.648  | 0.104  | 0.858 | 0.713-1.032 |
| 12 | Major factors(Medical    | -      | -     | 71.254 | <0.001 | -     | -            | -      | -     | 29.217 | <0.001 | -     | -           |
| 13 | price as the reference)  |        |       |        |        |       |              |        |       |        |        |       |             |
| 14 | Medical technology       | 1.862  | 0.233 | 64.062 | <0.001 | 6.435 | 4.079-10.151 | 1.226  | 0.297 | 16.982 | <0.001 | 3.407 | 1.902-6.104 |
| 15 | Convenience              | 1.142  | 0.237 | 23.222 | <0.001 | 3.134 | 1.969-4.988  | 0.182  | 0.274 | 0.442  | 0.506  | 1.200 | 0.701-2.055 |
| 16 | Attitude of service and  | 0.947  | 0.279 | 11.565 | <0.001 | 2.578 | 1.494-4.451  | -0.105 | 0.313 | 0.112  | 0.738  | 0.901 | 0.488-1.662 |
| 17 | medical ethnics          |        |       |        |        |       |              |        |       |        |        |       |             |
| 18 | Understanding            | -0.284 | 0.071 | 16.130 | <0.001 | 0.753 | 0.655-0.865  | 0.075  | 0.090 | 0.692  | 0.405  | 1.078 | 0.904-1.285 |
| 19 | community first          |        |       |        |        |       |              |        |       |        |        |       |             |
| 20 | diagnosis system         |        |       |        |        |       |              |        |       |        |        |       |             |
| 21 | Agreement community      | -      | -     | 3.336  | 0.189  | -     | -            | -      | -     | 3.100  | 0.212  | -     | -           |
| 22 | first(Doesn't matter as  |        |       |        |        |       |              |        |       |        |        |       |             |
| 23 | the reference)           |        |       |        |        |       |              |        |       |        |        |       |             |
| 24 | Agree                    | -0.153 | 0.155 | 0.973  | 0.324  | 0.858 | 0.633-1.163  | 0.316  | 0.210 | 2.257  | 0.133  | 1.372 | 0.908-2.071 |
| 25 | Disagree                 | 0.290  | 0.262 | 1.221  | 0.269  | 1.336 | 0.799-2.233  | -0.095 | 0.313 | 0.092  | 0.761  | 0.909 | 0.493-1.678 |
| 26 |                          |        |       |        |        |       |              |        |       |        |        |       |             |
| 27 |                          |        |       |        |        |       |              |        |       |        |        |       |             |
| 28 |                          |        |       |        |        |       |              |        |       |        |        |       |             |
| 29 |                          |        |       |        |        |       |              |        |       |        |        |       |             |
| 30 |                          |        |       |        |        |       |              |        |       |        |        |       |             |
| 31 |                          |        |       |        |        |       |              |        |       |        |        |       |             |
| 32 |                          |        |       |        |        |       |              |        |       |        |        |       |             |
| 33 |                          |        |       |        |        |       |              |        |       |        |        |       |             |
| 34 |                          |        |       |        |        |       |              |        |       |        |        |       |             |
| 35 |                          |        |       |        |        |       |              |        |       |        |        |       |             |
| 36 |                          |        |       |        |        |       |              |        |       |        |        |       |             |
| 37 |                          |        |       |        |        |       |              |        |       |        |        |       |             |
| 38 |                          |        |       |        |        |       |              |        |       |        |        |       |             |
| 39 |                          |        |       |        |        |       |              |        |       |        |        |       |             |
| 40 |                          |        |       |        |        |       |              |        |       |        |        |       |             |
| 41 |                          |        |       |        |        |       |              |        |       |        |        |       |             |
| 42 |                          |        |       |        |        |       |              |        |       |        |        |       |             |
| 43 |                          |        |       |        |        |       |              |        |       |        |        |       |             |
| 44 |                          |        |       |        |        |       |              |        |       |        |        |       |             |
| 45 |                          |        |       |        |        |       |              |        |       |        |        |       |             |
| 46 |                          |        |       |        |        |       |              |        |       |        |        |       |             |

## 427 **Discussion**

428 This study demonstrated the preferences and associated factors in the choice of  
429 medical institution for the first visit among Shenzhen residents. Generally, more than  
430 50% of the participants were willing to select municipal and district-level medical  
431 institutions for the first visit. Those with high education or income levels, or a  
432 Shenzhen registered permanent residence, were more inclined to choose high-level  
433 medical institutions. More than 70% of the participants considered medical  
434 technology and convenience as the main factors in choosing a medical institution.

### 435 **Factors influencing medical service preference**

436 In theory, an individual's healthcare needs do not necessarily translate to effective  
437 demand. The behavior of consuming medical service involves a series of  
438 decision-making processes governed by many factors. In addition to whether residents  
439 themselves perceive a need for health services, the choice is also associated with their  
440 income level, socioeconomic status, health security, transportation convenience, risk  
441 habits, health awareness, and the type and quality of services provided by health  
442 facilities.<sup>24</sup> Health-seeking behavior,<sup>20-22</sup> defined as the actions taken by individuals  
443 who perceive that they have an illness to obtain a suitable remedy,<sup>23</sup> occurs only if an  
444 individual indeed uses medical resources. Therefore, the expected medical institution  
445 for an individual's first consultation may differ from the actual selection. In the  
446 current study, we found that if participants were feeling unwell, the main factors  
447 influencing their preferred medical institution and their actual first visit differed.  
448 When conditions permit, occupation, and registered permanent residence were the  
449 main factors affecting participants' expected medical service selection. In  
450 comparison, education, and monthly income affected participants' actual first medical  
451 service selection. The exploration of factors affecting expected and actual first  
452 medical institution may aid in—determining the differences between individual  
453 preferences/attitudes towards the medical institution and their actual  
454 healthcare-seeking behaviors, a crucial aspect for strengthening the hierarchical  
455 diagnosis and treatment system, because it also concerns the effective allocation and  
456 rational use of medical resources.

457 Many factors may be associated with healthcare choices, including patient and family  
458 factors, provider factors and environmental factors. In the current study, the finding  
459 that medical technology and convenience were the main factors in choosing a medical  
460 institution is consistent with the results from previous studies in which participants  
461 prioritized organizational factors.<sup>25</sup> Healthcare providers' attitudes towards service  
462 and medical ethics also affect patients' preferences regarding medical service. A study  
463 in England indicated that the perception of provider responsiveness, considering  
464 factors such as convenience, waiting time, and confidence, is a strong motivating  
465 factor in choosing primary care.<sup>26</sup> In addition, perceived professionally relevant



1  
2  
3 466 factors<sup>27, 28</sup> and the number of physicians affect patients' choices.<sup>29</sup> Geographic  
4 467 factors should also be considered, because residents of disadvantaged areas were more  
5 468 aware of the contribution of their location to health disparities than residents of  
6 469 affluent areas, according to a study conducted in Australia.<sup>30</sup>

#### 470 **Dilemma of first diagnosis at the community health service center**

11  
12 471 Some of our findings may reflect the initial effects of reform implementation. Under  
13 472 the current hierarchical diagnosis and treatment system, the participants in the current  
14 473 study were not very familiar with the first diagnosis system of community health  
15 474 service centers, and most did not know whether a community health service center  
16 475 could provide a first diagnosis and questioned the service capacity. These phenomena  
17 476 will undoubtedly hinder the implementation of the hierarchical diagnosis and  
18 477 treatment system and are also uncondusive to residents' effective cooperation with the  
19 478 implementation of the system. Beyond the low level of awareness of the first  
20 479 diagnosis system, notably, participants' willingness to visit community health service  
21 480 centners was low. Only 21.1% of the participants indicated that they would choose  
22 481 community health centers for their initial visit, a finding inconsistent with the results  
23 482 of a previous study in Shenzhen, in which the willingness to use community health  
24 483 centers was high among patients who had health insurance, who were female and who  
25 484 were familiar with the gatekeeper policy.<sup>31</sup>

26 485 The concepts most relevant to hierarchical diagnosis and treatment worldwide are the  
27 486 three-level health care service model and the gatekeeper system, which essentially  
28 487 include the gatekeeper system and a two-way referral system centered on initial  
29 488 diagnosis at the grassroots level. It is not only a matter of seeing a doctor but also of  
30 489 institutional arrangement, which consists of division of labor among medical  
31 490 institutions, rational allocation of medical resources, maximization of use efficiency  
32 491 and refinement of patient management services.

33 492 However, the first diagnosis in a primary health care facility faces a dilemma. Patients  
34 493 tend to trust large hospitals that are well-equipped with advanced instruments and  
35 494 have highly skilled physicians. From the health provider's perspective, weaknesses  
36 495 such as the insufficient service capacity of primary health institutions, the ambiguous  
37 496 positioning of medical institutions and the inability to share information are quite  
38 497 clear.<sup>27, 29, 32</sup> For instance, according to the statistics of the 2016 Health and Family  
39 498 Planning Statistical Bulletin, 94.2% of the total primary medical and health  
40 499 institutions provided only 55.1% of the total diagnoses and treatments, whereas first-,  
41 500 second- and third-level hospitals, which accounted for 3.0% of all medical  
42 501 institutions, provided 41.2% of the diagnoses and treatments.<sup>33</sup> No incentive  
43 502 mechanisms exist in the hierarchical diagnosis and treatment system, which is  
44 503 generally led by health administrative departments and uses semi-mandatory  
45 504 measures to encourage patients to seek medical treatment in an orderly manner. This  
46 505 administrative hierarchical diagnosis and treatment system is passive and has not  
47 506 included an effective incentive mechanism.

48 507 The United Kingdom, which has one of the first established and strictest hierarchical

1  
2  
3 508 diagnosis and treatment system among Western countries, has become a typical  
4 509 representative of the British welfare system. Although prominent problems, such as  
5 510 rapid growth of medical expenses and low efficiency, have become the challenges  
6 511 faced by the NHS,<sup>34, 35</sup> its successful experiences, particularly its gatekeeper system,  
7 512 may have served as a reference for China's medical reform.

8 513 To solve the dilemma of first diagnosis by community health services, several  
9 514 approaches may be proposed on the basis of other countries' successful experiences.  
10 515 **First**, to improve the ability of primary medical and health services, the management  
11 516 of the general practitioner system and personnel training should be strengthened.  
12 517 Successful experiences have been described, such as the Quality of Health Framework  
13 518 in UK,<sup>36</sup> Royal College of General Practitioners (RACGP) in Australia,<sup>37</sup> and  
14 519 Germany's implementation of accessing management and strict practice qualification  
15 520 review for physicians.<sup>38</sup> **Second**, referring to the United States, the implementation of  
16 521 strict cost control and incentive measures can be used to clarify the diagnostic criteria  
17 522 for disease and to specify the length of hospitalization through diagnosis-related  
18 523 classifications.<sup>39</sup> **Third**, payment methods can be more diversified. For example, the  
19 524 option of paying per capita, as in Canada, could be added to encourage general  
20 525 practitioners to actively control medical expenses and attract more community  
21 526 residents to sign up for first consultations.<sup>40</sup>

### 22 23 24 25 26 27 28 29 527 **Disease severity may affect patients' preferences**

30  
31  
32 528 Although we reported that the main factors influencing participants' expected and  
33 529 actual first visits differed, we did not further explore the influences of disease severity  
34 530 and comorbidities. When individuals are ill, decisions as to whether to seek medical  
35 531 treatment and which healthcare provider to choose are made by patients and their  
36 532 family members, mainly according to personal preferences, disease severity and  
37 533 economic capacity.<sup>20</sup> A previous study has indicated that the distance to the provider  
38 534 becomes less important as the illness becomes more severe.<sup>41</sup> Self-assessment of  
39 535 disease severity may also play an important role in the selection of the first medical  
40 536 service. In addition, in cases of perceived minor or severe illness, factors influencing  
41 537 the choice of medical service differed between urban and rural respondents. In the  
42 538 case of perceived minor illness, both rural or urban residents stated many factors  
43 539 causing them not to access the system at the lower, primary level. The respondents  
44 540 indicated that higher quality of care outweighed the higher costs of transportation,  
45 541 services and medication, as well as the inconvenience of the complex physical  
46 542 environment.<sup>42</sup>

### 47 48 49 50 51 52 543 **Influences of income and medical investment on participants' choices**

53  
54  
55 544 Participants with high education, high monthly income or favorable housing  
56 545 conditions, such as self-purchased or rented commercial houses, were more inclined  
57 546 to choose high-level medical institutions for their first visit. These findings were  
58 547 consistent with those from a previous systematic review, which has also revealed that

1  
2  
3 548 higher income, higher education and urbanization are associated with access at high  
4 549 levels.<sup>22</sup>

5  
6 550 Income is usually considered a measure of socioeconomic status. To some extent, the  
7 551 definition of the position of income in its hierarchy relative to the prevailing social  
8 552 norm may matter, rather than income itself. The influence of income on medical  
9 553 preferences may involve various factors including socioeconomic status, income and  
10 554 environment. Generally, a positive correlation exists between income and healthcare  
11 555 use.<sup>24</sup> Wealthy individuals are less likely to underuse healthcare resources; instead,  
12 556 they spend more money and time on healthcare, whereas individuals with lower  
13 557 income face greater barriers to accessing adequate health care.<sup>43</sup> A study from Finland  
14 558 has also indicated that retirees over the age of 60 or individuals without formal  
15 559 employment have relatively greater difficulty in accessing medical help or even may  
16 560 not seek treatment because of their lower incomes.<sup>32, 44</sup> A study conducted in 14  
17 561 tertiary hospitals in China has reported that patients' preferences are influenced  
18 562 mainly by illness severity and sociodemographic characteristics, and patients with  
19 563 higher monthly incomes express a preference for first-class providers.<sup>20</sup> In contrast,  
20 564 Geitona *et al.* have suggested that the utilization of primary and secondary healthcare  
21 565 in Greece is determined primarily by health status rather than socioeconomic factors.  
22 566<sup>45</sup>

23  
24 567 The relationship between income and health is also demonstrated through investment  
25 568 in medical services. Total health expenditure, an internationally accepted indicator, is  
26 569 widely considered an effective way to understand the health status of a country.  
27 570 Taking the government capital investment in health services into account, further  
28 571 increasing investment in medical and health services, and paying greater attention to  
29 572 population health are crucial. Some countries in South East Asia spend very little on  
30 573 health; for example, India spends \$215 in terms of purchasing power parity per  
31 574 person, which is lower than that in comparable middle-income countries, such as  
32 575 China, Brazil and South Africa. A great need exists for countries to extend health  
33 576 funding by taking a broader view of investing in human capital. Thus, on the basis of  
34 577 the observations of the current study, we strongly recommend that cities with rapid  
35 578 economic growth accelerate their investment in medical resources to solve the  
36 579 problems related to the imbalances between the economy and health.

## 37 38 39 40 41 42 43 44 45 46 580 **Limitations**

47  
48  
49 581 Several limitations of this study must be addressed. **First**, although the study sample  
50 582 was representative, as a result of random sampling according to the proportions of the  
51 583 population from all districts of Shenzhen, because of the large floating population in  
52 584 Shenzhen, the interpretation and extrapolation of the observed preferences for first  
53 585 medical service to the entire city population should be performed with great caution.  
54 586 **Second**, we did not further explore the effects of disease severity nonparticipants'  
55 587 preferences regarding their initial visit. Self-assessment of disease severity may play  
56 588 an important role in the selection of first medical service. Convenience, such as  
57 589 distance, becomes less important as an illness becomes more severe.<sup>41</sup> **Third**, because

1  
2  
3 590 the study focused on participants 18 years of age or older, we were unable to collect  
4 591 information on the preferences regarding first medical service from children or their  
5 592 parents. Shenzhen is a city with a young population age structure, and, because of the  
6 593 two-child policy recently imposed by the Chinese government, pediatrician shortage  
7 594 has become an increasingly important issue. Parents' choices regarding high-level  
8 595 medical institutions may be affected by the shortage of specialists.<sup>46</sup> Selection bias  
9 596 might have existed. Because the study participants were outpatient, we could not  
10 597 demonstrate and compare the preferences and attitudes towards first medical service  
11 598 between inpatients and non-patients.

12 599 **Finally**, although the participants were randomly selected from ten districts, we did  
13 600 not consider the effects of geographical characteristics on the residents' preferences  
14 601 regarding first medical service. Shenzhen is long and narrow from east to west and  
15 602 shorter from north to south. The allocation and accessibility of medical resources may  
16 603 somewhat affect people's willingness to use and preferences regarding medical  
17 604 service.

18 605

## 19 606 **Conclusion**

20 607 In general, more than 50% of the participants were willing to select municipal and  
21 608 district-level medical institutions for the first visit. Those with higher education or  
22 609 income levels, or Shenzhen registered permanent residence, were more inclined to  
23 610 choose high-level medical institutions for the first visit. Medical technology and  
24 611 convenience were considered the main factors in the choice of medical institution.

## 25 612 **Acknowledgements**

26 613 We acknowledge the participation of each subject. We also would like to thank  
27 614 Professor Yang Zheng and Professor Huang Zhigang for their help and support in the  
28 615 study design and data collection.

## 29 616 **Contributors**

30 617 DJ and XZ conceived and designed the study. XJ, LK, ZZ, LX and HS conducted the  
31 618 field work. DJ and ZX conducted the field work and did the initial analyses of the  
32 619 data and wrote the manuscript. CH commented on the interpretation of the data. DJ,  
33 620 XZ and XJ revised and reviewed the manuscript. All authors have seen and approved  
34 621 the final version the abstract for publication.

## 35 622 **Funding**

36 623 This study was partly supported by PhD Start-up Fund of Guangdong Medical  
37 624 University (No: B2019007), Guangdong Province Educational Science "Thirteenth

1  
2  
3 625 Five-Year Plan" Project (No: 2019GXJK226), Humanities and Social Sciences  
4 626 Planning Project of the Ministry of Education (No: 17YJAZH094 ) and Special  
5 627 project of Guangdong Provincial Department of Education (No: 2020KZDZX1106).

6  
7  
8 628 **Competing interest statement :**

9  
10 629 No competing interests.

11 630 **Data sharing:**

12  
13 631 No additional data available.

14  
15  
16 632 **References**

- 17  
18  
19 633 1. Liu GG, Vortherms SA, Hong X. China's Health Reform Update. *Annu Rev*  
20 634 *Public Health*. 2017;38:431-48.  
21  
22 635 2. Chinese State Council. Guiding Opinions of the General Office of the State  
23 636 Council on Promoting the Construction of a Hierarchical Diagnosis and Treatment  
24 637 System[EB/OL]. (2015-10-20)[2022-1-11].  
25 638 [http://www.gov.cn/zhengce/content/2015-10/20/content\\_10250.htm](http://www.gov.cn/zhengce/content/2015-10/20/content_10250.htm).  
26  
27 639 3. Wang X, Yang H, Duan Z, et al. Spatial accessibility of primary health care in  
28 640 China: A case study in Sichuan Province. *Soc Sci Med*. 2018;209:14-24.  
29  
30 641 4. Wang HH, Wang JJ, Wong SY, et al. The development of urban community  
31 642 health centres for strengthening primary care in China: a systematic literature review.  
32 643 *Br Med Bull*. 2015;116:139-53.  
33  
34 644 5. Yang J, Siri JG, Remais JV, et al. The Tsinghua-Lancet Commission on Healthy  
35 645 Cities in China: unlocking the power of cities for a healthy China. *Lancet*.  
36 646 2018;391(10135):2140-84.  
37  
38 647 6. Xiao Y, Chen X, Li Q, et al. Towards healthy China 2030: Modeling health care  
39 648 accessibility with patient referral. *Soc Sci Med*. 2021;276:113834.  
40  
41 649 7. Alvarez-Rosete A, Mays N. Understanding NHS Policy Making in England: The  
42 650 Formulation of the NHS Plan, 2000. *The British Journal of Politics and International*  
43 651 *Relations*. 2014;16(4):624-44.  
44  
45 652 8. Wu Q, Xie X, Liu W, et al. Implementation efficiency of the hierarchical  
46 653 diagnosis and treatment system in China: A case study of primary medical and health  
47 654 institutions in Fujian province. *Int J Health Plann Manage*. 2021;37(1):214-27.  
48  
49 655 9. Forrest CB. Primary care in the United States: primary care gatekeeping and  
50 656 referrals: effective filter or failed experiment? *BMJ*. 2003;326(7391):692-5.  
51  
52 657 10. Qiao L, Li Y, Liu Y, et al. The spatio-temporal change of China's net floating  
53 658 population at county scale from 2000 to 2010. *Asia Pacific Viewpoint*.  
54 659 2016;57(3):365-78.  
55  
56 660 11. Zhu L, Zhong S, Tu W, et al. Assessing Spatial Accessibility to Medical  
57 661 Resources at the Community Level in Shenzhen, China. *International journal of*  
58 662 *environmental research and public health*. 2019;16(2):242.  
59  
60 663 12. Yip W, Hsiao W. Harnessing the privatisation of China's fragmented health-care

- 1  
2  
3 664 delivery. *Lancet*. 2014;384(9945):805-18.
- 4 665 13. Wu D, Lam TP. Underuse of Primary Care in China: The Scale, Causes, and  
5 666 Solutions. *J Am Board Fam Med*. 2016;29(2):240-7.
- 6 667 14. Li X, Lu J, Hu S, et al. The primary health-care system in China. *Lancet*.  
7 668 2017;390(10112):2584-94.
- 8 669 15. Commission NH. China Health Statistics Yearbook. Beijing: Peking Union  
9 670 Medical College Press; 2019.
- 10 671 16. Li X, Krumholz HM, Yip W, et al. Quality of primary health care in China:  
11 672 challenges and recommendations. *Lancet*. 2020;395(10239):1802-12.
- 12 673 17. Yip W, Fu H, Chen AT, et al. 10 years of health-care reform in China: progress  
13 674 and gaps in Universal Health Coverage. *Lancet*. 2019;394(10204):1192-204.
- 14 675 18. Shenzhen Statistics Bureau, Survey Office of the National Bureau of Statistics in  
15 676 Shenzhen. Shenzhen Statistical Year Book 2017. Beijing: China Statistics Press;  
16 677 2017..
- 17 678 19. Yuan X. Study on Resource Allocation of Community Health Service Centres in  
18 679 Shenzhen Shenzhen University; 2017.
- 19 680 20. Yu W, Li M, Ye F, et al. Patient preference and choice of healthcare providers in  
20 681 Shanghai, China: a cross-sectional study. *BMJ Open*. 2017;7(10):e016418.
- 21 682 21. Jia E, Gu Y, Peng Y, et al. Preferences of Patients with Non-Communicable  
22 683 Diseases for Primary Healthcare Facilities: A Discrete Choice Experiment in Wuhan,  
23 684 China. *International journal of environmental research and public health*.  
24 685 2020;17(11):3987.
- 25 686 22. Liu Y, Kong Q, Yuan S, et al. Factors influencing choice of health system access  
26 687 level in China: A systematic review. *PLoS One*. 2018;13(8):e0201887.
- 27 688 23. Kasl SV, Cobb S. Health behavior, illness behavior, and sick-role behavior. II.  
28 689 Sick-role behavior. *Arch Environ Health*. 1966;12(4):531-41.
- 29 690 24. Zeng Y, Wan Y, Yuan Z, et al. Healthcare-Seeking Behavior among Chinese  
30 691 Older Adults: Patterns and Predictive Factors. *International journal of environmental  
31 692 research and public health*. 2021;18(6):2969.
- 32 693 25. Wu D, Lam TP, Lam KF, et al. Health reforms in china: the public's choices for  
33 694 first-contact care in urban areas. *Fam Pract*. 2017;34(2):194-200.
- 34 695 26. Sturgeon D. Convenience, quality and choice: Patient and service-provider  
35 696 perspectives for treating primary care complaints in urgent care settings. *Int Emerg  
36 697 Nurs*. 2017;35:43-50.
- 37 698 27. Santos R, Gravelle H, Propper C. Does Quality Affect Patients' Choice of  
38 699 Doctor? Evidence from England. *Econ J (London)*. 2017;127(600):445-94.
- 39 700 28. Fanjiang G, von Glahn T, Chang H, et al. Providing patients web-based data to  
40 701 inform physician choice: if you build it, will they come? *J Gen Intern Med*.  
41 702 2007;22(10):1463-6.
- 42 703 29. Hou S, Gan Y. Analysis and Implications of the Factors Influencing Beijing  
43 704 Residents' Choice of Medical Services. *Chinese Medical Journal*. 2017;34(4):350-2.
- 44 705 30. Lewis S, Willis K, Collyer F. Navigating and making choices about healthcare:  
45 706 The role of place. *Health Place*. 2018;52:215-20.
- 46 707 31. Gan Y, Li W, Cao S, et al. Patients' Willingness on Community Health Centers

- 1  
2  
3 708 as Gatekeepers and Associated Factors in Shenzhen, China: A Cross-sectional Study.  
4 709 *Medicine*. 2016;95(14):e3261.
- 5 710 32. Pitkanen V, Linnosmaa I. Choice, quality and patients' experience: evidence from  
6 711 a Finnish physiotherapy service. *Int J Health Econ Manag*. 2021;21(2):229-45.
- 7 712 33. National Health and Family Planning Commission of China. Statistical bulletin  
8 713 on the development of China's health and family planning in 2016[EB/OL].  
9 714 (2017-08-18)[2022-1-11].  
10 715 [http://www.nhc.gov.cn/guihuaxxs/s10748/201708/d82fa7141696407abb4ef764f3edf0](http://www.nhc.gov.cn/guihuaxxs/s10748/201708/d82fa7141696407abb4ef764f3edf095.shtml)  
11 716 95.shtml.
- 12 717 34. Ding C. Comparative analysis of medical insurance models in Germany and  
13 718 Britain: Bismarck model and Beveridge model. *Collected Essays on Finance and*  
14 719 *Economics*. 2009(1):6.
- 15 720 35. Hu L. Reform and Enlightenment of British National Medical Service System  
16 721 *Health Economics Research*. 2011(3):3.
- 17 722 36. Shekelle P. New contract for general practitioners. *BMJ*. 2003;326(7387):457-8.
- 18 723 37. You C, Wang F, Zhu Y, et al. Summary of Performance Evaluation on Primary  
19 724 Health Care and General Practice in Australia. *Chinese Primary Health Care*.  
20 725 2011;25(2):14-6.
- 21 726 38. Zhang Y, Huang R, Jiang P, et al. Teaching Model and Evaluation System of  
22 727 General Practice Training in Germany and Its Enlightenment to China. *Chinese*  
23 728 *General Practice*. 2019;022(034):4179-84.
- 24 729 39. Palmer G, Reid B. Evaluation of the performance of diagnosis-related groups and  
25 730 similar casemix systems: methodological issues. *Health Services Management*  
26 731 *Research*. 2001;14(2):71-81.
- 27 732 40. Tian J, Ji X. What Can We Learn From Canadian Experience of General  
28 733 Practitioner System? *Chinese General Practice*. 2013;16(26):3.
- 29 734 41. Qian D, Pong RW, Yin A, et al. Determinants of health care demand in poor,  
30 735 rural China: the case of Gansu Province. *Health Policy Plan*. 2009;24(5):324-34.
- 31 736 42. Liu Y, Zhong L, Yuan S, et al. Why patients prefer high-level healthcare  
32 737 facilities: a qualitative study using focus groups in rural and urban China. *BMJ Glob*  
33 738 *Health*. 2018;3(5):e000854.
- 34 739 43. Wang Z, Li X, Chen M, et al. Social health insurance, healthcare utilization, and  
35 740 costs in middle-aged and elderly community-dwelling adults in China. *Int J Equity*  
36 741 *Health*. 2018;17(1):17.
- 37 742 44. Meyer SB, Luong TC, Mamerow L, et al. Inequities in access to healthcare:  
38 743 analysis of national survey data across six Asia-Pacific countries. *Bmc Health*  
39 744 *Services Research*. 2013;13(1):238.
- 40 745 45. Geitona M, Zavras D, Kyriopoulos J. Determinants of healthcare utilization in  
41 746 Greece: implications for decision-making. *Eur J Gen Pract*. 2007;13(3):144-50.
- 42 747 46. Hu KJ, Sun ZZ, Rui YJ, et al. Shortage of paediatricians in China. *Lancet*.  
43 748 2014;383(9921):954.

1  
2  
3  
4  
5  
6  
7  
8  
9  
10  
11  
12  
13  
14  
15  
16  
17  
18  
19  
20  
21  
22  
23  
24  
25  
26  
27  
28  
29  
30  
31  
32  
33  
34  
35  
36  
37  
38  
39  
40  
41  
42  
43  
44  
45  
46  
47  
48  
49  
50  
51  
52  
53  
54  
55  
56  
57  
58  
59  
60STROBE Statement—Checklist of items that should be included in reports of *cross-sectional studies*

|                              | Item No | Recommendation                                                                                                                                                                                    | Page number |
|------------------------------|---------|---------------------------------------------------------------------------------------------------------------------------------------------------------------------------------------------------|-------------|
| <b>Title and abstract</b>    | 1       | (a) Indicate the study's design with a commonly used term in the title or the abstract                                                                                                            | 1, 2, 3     |
|                              |         | (b) Provide in the abstract an informative and balanced summary of what was done and what was found                                                                                               | 2, 3        |
| <b>Introduction</b>          |         |                                                                                                                                                                                                   |             |
| Background/rationale         | 2       | Explain the scientific background and rationale for the investigation being reported                                                                                                              | 4, 5        |
| Objectives                   | 3       | State specific objectives, including any prespecified hypotheses                                                                                                                                  | 6           |
| <b>Methods</b>               |         |                                                                                                                                                                                                   |             |
| Study design                 | 4       | Present key elements of study design early in the paper                                                                                                                                           | 6           |
| Setting                      | 5       | Describe the setting, locations, and relevant dates, including periods of recruitment, exposure, follow-up, and data collection                                                                   | 6           |
| Participants                 | 6       | (a) Give the eligibility criteria, and the sources and methods of selection of participants                                                                                                       | 6           |
| Variables                    | 7       | Clearly define all outcomes, exposures, predictors, potential confounders, and effect modifiers. Give diagnostic criteria, if applicable                                                          | N/A         |
| Data sources/<br>measurement | 8*      | For each variable of interest, give sources of data and details of methods of assessment (measurement). Describe comparability of assessment methods if there is more than one group              | 6, 7        |
| Bias                         | 9       | Describe any efforts to address potential sources of bias                                                                                                                                         | 6           |
| Study size                   | 10      | Explain how the study size was arrived at                                                                                                                                                         | 6           |
| Quantitative variables       | 11      | Explain how quantitative variables were handled in the analyses. If applicable, describe which groupings were chosen and why                                                                      | 7           |
| Statistical methods          | 12      | (a) Describe all statistical methods, including those used to control for confounding                                                                                                             | 7           |
|                              |         | (b) Describe any methods used to examine subgroups and interactions                                                                                                                               | 7           |
|                              |         | (c) Explain how missing data were addressed                                                                                                                                                       | 7           |
|                              |         | (d) If applicable, describe analytical methods taking account of sampling strategy                                                                                                                | 6           |
|                              |         | (e) Describe any sensitivity analyses                                                                                                                                                             | N/A         |
| <b>Results</b>               |         |                                                                                                                                                                                                   |             |
| Participants                 | 13*     | (a) Report numbers of individuals at each stage of study—eg numbers potentially eligible, examined for eligibility, confirmed eligible, included in the study, completing follow-up, and analysed | N/A         |
|                              |         | (b) Give reasons for non-participation at each stage                                                                                                                                              | N/A         |
|                              |         | (c) Consider use of a flow diagram                                                                                                                                                                | N/A         |
| Descriptive data             | 14*     | (a) Give characteristics of study participants (eg                                                                                                                                                | 8           |



|                          |     |                                                                                                                                                                                                              |            |
|--------------------------|-----|--------------------------------------------------------------------------------------------------------------------------------------------------------------------------------------------------------------|------------|
|                          |     | demographic, clinical, social) and information on exposures and potential confounders                                                                                                                        |            |
|                          |     | (b) Indicate number of participants with missing data for each variable of interest                                                                                                                          | N/A        |
| Outcome data             | 15* | Report numbers of outcome events or summary measures                                                                                                                                                         | 8, 9       |
| Main results             | 16  | (a) Give unadjusted estimates and, if applicable, confounder-adjusted estimates and their precision (eg, 95% confidence interval). Make clear which confounders were adjusted for and why they were included | 23, 24, 25 |
|                          |     | (b) Report category boundaries when continuous variables were categorized                                                                                                                                    | 8, 9       |
|                          |     | (c) If relevant, consider translating estimates of relative risk into absolute risk for a meaningful time period                                                                                             | N/A        |
| Other analyses           | 17  | Report other analyses done—eg analyses of subgroups and interactions, and sensitivity analyses                                                                                                               | 9-23       |
| <b>Discussion</b>        |     |                                                                                                                                                                                                              |            |
| Key results              | 18  | Summarise key results with reference to study objectives                                                                                                                                                     | 25         |
| Limitations              | 19  | Discuss limitations of the study, taking into account sources of potential bias or imprecision. Discuss both direction and magnitude of any potential bias                                                   | 30, 31     |
| Interpretation           | 20  | Give a cautious overall interpretation of results considering objectives, limitations, multiplicity of analyses, results from similar studies, and other relevant evidence                                   | 25-30      |
| Generalisability         | 21  | Discuss the generalisability (external validity) of the study results                                                                                                                                        | 31         |
| <b>Other information</b> |     |                                                                                                                                                                                                              |            |
| Funding                  | 22  | Give the source of funding and the role of the funders for the present study and, if applicable, for the original study on which the present article is based                                                | 32         |

\*Give information separately for exposed and unexposed groups.

**Note:** An Explanation and Elaboration article discusses each checklist item and gives methodological background and published examples of transparent reporting. The STROBE checklist is best used in conjunction with this article (freely available on the Web sites of PLoS Medicine at <http://www.plosmedicine.org/>, Annals of Internal Medicine at <http://www.annals.org/>, and Epidemiology at <http://www.epidem.com/>). Information on the STROBE Initiative is available at [www.strobe-statement.org](http://www.strobe-statement.org).
